# Supplementary material for: Databases for technical aspects of immunohistochemistry: 2021 update
Source: PubMed Central journal article supplement — J Toxicol Pathol. 2021 Feb 25;34(2):161–80. doi: 10.1293/tox.2021-0006 (PMC8100252; doi:10.1293/tox.2021-0006), 2021-02-25
Supplement: tox-34-161-s001.pdf [file tox-34-161-s001.pdf]

Supplementary Table 1-1 Immunological properties of primary antibodies and their respective IHC staining conditions

|                                                          |            | Primary antibody                         |                      |                    |             |    |    |    |    |     |     |            |           |          |              | Dilution   | Incubation time                             | Temperature                                 | Supplementary information               | Positive control | Reactivity |
|----------------------------------------------------------|------------|------------------------------------------|----------------------|--------------------|-------------|----|----|----|----|-----|-----|------------|-----------|----------|--------------|------------|---------------------------------------------|---------------------------------------------|-----------------------------------------|------------------|------------|
| Antibody                                                 |            |                                          |                      | Species reactivity |             |    |    |    |    |     |     |            |           |          |              |            |                                             |                                             |                                         |                  |            |
| Antigen                                                  | Clone      | Supplier                                 | Catalog No.          | Clonality          | Host animal | Rt | Mo | Rb | GP | Pri | Dog | Sw         | Other     |          |              |            |                                             |                                             |                                         |                  |            |
| ACTH                                                     | SPM333     | Santa Cruz Biotechnology, Inc.           | sc-52980             | MoAb               | Mo          | ○  | ○  | -  | -  | -   | -   | -          | -         | ~×1/100  | O/N          | 4°C        | -                                           | Pituitary                                   | ○                                       |                  |            |
|                                                          | 02A3       | Agilent Technology                       | M350101-2            | MoAb               | Mo          | ○  | -  | -  | -  | -   | -   | -          | -         | ~×1/500  | ~60m         | RT         | -                                           | Pituitary                                   | ○                                       |                  |            |
| Actin, β                                                 | AC-74      | Sigma-Aldrich                            | A2228                | MoAb               | Mo          | ○  | ○  | ○  | -  | ○   | -   | -          | -         | ~×1/500  | O/N          | 4°C        | -                                           | Testis                                      | ○                                       |                  |            |
| Actin, muscle                                            | HHF35      | Agilent Technology                       | M063501-2            | MoAb               | Mo          | ○  | -  | -  | -  | -   | -   | -          | -         | ~×1/100  | ~30m         | RT         | -                                           | Muscle                                      | ○                                       |                  |            |
| Actin, sarcomeric                                        | Alpha-Sr-1 | Agilent Technology                       | M087401-2            | MoAb               | Mo          | ○  | -  | -  | -  | -   | -   | -          | -         | ×1/10    | ~120m or O/N | RT or 4°C  | -                                           | Muscle                                      | ○                                       |                  |            |
|                                                          |            |                                          |                      | MoAb               | Mo          | ○  | -  | -  | -  | -   | -   | -          | -         | -        | ~×1/100      | ~60m       | RT                                          | -                                           | Muscle                                  | ○                |            |
| Actin, α-smooth muscle                                   | IA4        | Agilent Technology                       | M085129-2            | MoAb               | Mo          | ○  | -  | -  | -  | -   | ○   | -          | -         | ~×1/50   | ~30m         | 4°C        | -                                           | Other                                       | ○                                       |                  |            |
|                                                          |            |                                          |                      | MoAb               | Mo          | ○  | ○  | -  | -  | -   | -   | -          | -         | -        | ~×1/100      | O/N        | 4°C                                         | -                                           | Vessel                                  | ○                |            |
|                                                          |            |                                          |                      | MoAb               | Mo          | ○  | ○  | -  | -  | -   | -   | -          | -         | -        | -            | ~×1/50     | O/N                                         | 4°C                                         | -                                       | Mammary          | ○          |
|                                                          |            |                                          |                      | MoAb               | Mo          | -  | -  | -  | -  | -   | ○   | ○          | -         | -        | -            | ~×1/200    | O/N                                         | 4°C                                         | -                                       | Vessel           | ○          |
|                                                          |            |                                          |                      | MoAb               | Mo          | ○  | -  | -  | -  | -   | -   | -          | -         | -        | -            | ~×1/1000   | ~60m                                        | RT                                          | -                                       | Eye              | ○          |
|                                                          |            |                                          |                      | MoAb               | Mo          | ○  | -  | -  | -  | -   | -   | -          | -         | Marmoset | ~×1/100      | ~60m       | RT                                          | Diluted with IMMUNOSHOT immunostaining Fine | Intestine                               | ○                |            |
|                                                          |            |                                          |                      | MoAb               | Mo          | -  | ○  | -  | -  | -   | -   | -          | -         | -        | -            | ~×1/100    | ~60m                                        | RT                                          | -                                       | Intestine        | ○          |
|                                                          |            |                                          |                      | MoAb               | Mo          | ○  | -  | -  | -  | -   | -   | -          | -         | -        | -            | ~×1/500    | ~120m or O/N                                | RT or 4°C                                   | -                                       | Muscle           | ○          |
|                                                          |            |                                          |                      | MoAb               | Mo          | ○  | -  | -  | -  | -   | -   | ○          | -         | -        | -            | ~×1/1000   | ~60m                                        | RT                                          | -                                       | Vessel           | ○          |
|                                                          |            |                                          |                      | MoAb               | Mo          | ○  | -  | -  | -  | -   | -   | -          | -         | -        | -            | ~×1/100    | O/N                                         | 4°C                                         | -                                       | Mammary          | ○          |
|                                                          | MoAb       | Mo                                       | -                    | -                  | -           | -  | -  | -  | ○  | -   | Cow | ~×1/1000   | ~30m      | RT       | -            | Intestine  | ○                                           |                                             |                                         |                  |            |
|                                                          | MoAb       | Mo                                       | -                    | -                  | -           | -  | -  | -  | ○  | -   | -   | -          | -         | O/N      | 4°C          | -          | Lung                                        | ○                                           |                                         |                  |            |
|                                                          | MoAb       | Mo                                       | Nichirei Biosciences | 412021             | MoAb        | Mo | ○  | ○  | -  | -   | -   | -          | -         | -        | Prediluted   | ~60m       | RT                                          | -                                           | Kidney (Mouse)<br>Large intestine (Rat) | ○                |            |
|                                                          | MoAb       | Mo                                       | Abcam plc            | ab32575            | MoAb        | Rb | ○  | -  | -  | -   | -   | -          | -         | -        | ~×1/500      | O/N        | 4°C                                         | -                                           | Muscle                                  | ○                |            |
| MoAb                                                     | Mo         | Abcam plc                                | ab32575              | MoAb               | Rb          | ○  | ○  | -  | -  | -   | -   | -          | -         | ~×1/500  | ~60m         | RT         | -                                           | Uterus                                      | ○                                       |                  |            |
| MoAb                                                     | Mo         | Abcam plc                                | ab124964             | MoAb               | Rb          | -  | ○  | -  | -  | -   | -   | -          | -         | ~×1/500  | O/N          | 4°C        | -                                           | Muscle                                      | ○                                       |                  |            |
| Adipophilin                                              | -          | -                                        | GP40                 | PoAb               | GP          | ○  | -  | -  | -  | -   | -   | -          | -         | ~×1/100  | O/N          | 4°C        | -                                           | Liver                                       | △                                       |                  |            |
|                                                          |            |                                          |                      |                    |             | ○  | ○  | -  | -  | -   | -   | -          | -         | ~×1/100  | ~60m         | RT         | -                                           | Adrenal                                     | ○                                       |                  |            |
|                                                          |            |                                          |                      |                    |             | ○  | ○  | -  | -  | -   | -   | -          | -         | ~×1/1000 | ~60m         | 37°C       | -                                           | Liver                                       | ○                                       |                  |            |
|                                                          |            |                                          |                      |                    |             | -  | ○  | -  | -  | -   | -   | -          | ○         | ~×1/100  | ~60m         | RT         | Diluted with IMMUNOSHOT immunostaining Fine | Other                                       | ○                                       |                  |            |
|                                                          | AP125      | Progen                                   | -                    | 651102             | MoAb        | Mo | ○  | -  | -  | -   | -   | ○          | -         | -        | Prediluted   | ~60m       | RT                                          | -                                           | Liver                                   | ○                |            |
|                                                          |            |                                          |                      |                    | MoAb        | Mo | ○  | -  | -  | -   | -   | ○          | -         | -        | -            | Prediluted | ~60m                                        | RT                                          | -                                       | Adrenal          | ○          |
|                                                          |            |                                          |                      |                    | MoAb        | Mo | ○  | -  | -  | -   | -   | -          | -         | Marmoset | ~×1/200      | ~30m       | RT                                          | Diluted with IMMUNOSHOT immunostaining Fine | Adrenal                                 | ○                |            |
|                                                          |            |                                          |                      |                    | MoAb        | Mo | ○  | -  | -  | -   | -   | -          | -         | -        | -            | Prediluted | ~60m                                        | RT                                          | -                                       | Liver            | ○          |
| MoAb                                                     | Mo         | ○                                        | -                    | -                  | -           | -  | -  | -  | -  | -   | -   | Prediluted | ~60m      | RT       | -            | Liver      | ○                                           |                                             |                                         |                  |            |
| MoAb                                                     | Mo         | Acris Antibodies GmbH                    | BM5051               | MoAb               | Mo          | ○  | -  | -  | -  | -   | -   | -          | ~×1/50    | O/N      | 4°C          | -          | Mammary                                     | ○                                           |                                         |                  |            |
| MoAb                                                     | Mo         | Novus Biologicals                        | NB110-40877          | PoAb               | Rb          | -  | ○  | -  | -  | -   | -   | -          | ~×1/20000 | O/N      | 4°C          | -          | Adrenal                                     | ○                                           |                                         |                  |            |
| Albumin                                                  | -          | Agilent Technology                       | A000102-2            | PoAb               | Rb          | ○  | -  | -  | -  | -   | -   | -          | ~×1/1000  | ~60m     | RT           | -          | Eye                                         | ○                                           |                                         |                  |            |
| Amylase 2A                                               | -          | Proteintech                              | 15845-1-AP           | PoAb               | Rb          | ○  | -  | -  | -  | -   | -   | -          | ~×1/200   | ~60m     | RT           | -          | Pancreas                                    | ○                                           |                                         |                  |            |
| β-Amyloid                                                | 6E10       | Covance                                  | SIG-39300-99         | MoAb               | Mo          | -  | ○  | -  | -  | -   | -   | -          | -         | ~×1/500  | O/N          | 4°C        | -                                           | Brain                                       | ○                                       |                  |            |
|                                                          | 82E1       | Immuno-Biological Laboratories Co., Ltd. | 10326                | MoAb               | Mo          | -  | ○  | -  | -  | -   | -   | -          | -         | ~×1/200  | ~60m         | RT         | -                                           | Brain                                       | ○                                       |                  |            |
| Androgen receptor                                        | G122-25    | BD Pharmingen Inc.                       | 554224               | MoAb               | Mo          | -  | -  | ○  | -  | -   | -   | -          | ~×1/100   | O/N      | 4°C          | -          | Gonad                                       | ○                                           |                                         |                  |            |
| Anti-Human Macrophage Scavenger Receptor A (MSR-A:CD204) | SRA-E5     | Trans Genic                              | KT022                | MoAb               | Mo          | -  | -  | -  | -  | ○   | -   | -          | -         | ~×1/500  | ~60m         | RT         | -                                           | Spleen                                      | ○                                       |                  |            |
| Aquaporin 1                                              | I/22       | Abcam plc                                | ab9566               | MoAb               | Mo          | ○  | ○  | -  | -  | ○   | -   | -          | -         | ~×1/200  | O/N          | 4°C        | -                                           | Kidney                                      | ○                                       |                  |            |
|                                                          | I/ASF6     | GeneTen                                  | GTX11023             | MoAb               | Mo          | ○  | ○  | -  | -  | -   | -   | -          | -         | ~×1/1000 | ~60m         | RT         | -                                           | Kidney                                      | ○                                       |                  |            |
|                                                          | -          | Merck                                    | AB2219               | PoAb               | Rb          | ○  | -  | -  | -  | -   | -   | -          | -         | ×1/1000  | O/N          | 4°C        | -                                           | Kidney                                      | ○                                       |                  |            |

Supplementary Table 1-2 Immunological properties of primary antibodies and their respective IHC staining conditions

| Antibody                                                 | Primary antibody |             |           |                          |                |                          |                        |                   |                                  |               |
|----------------------------------------------------------|------------------|-------------|-----------|--------------------------|----------------|--------------------------|------------------------|-------------------|----------------------------------|---------------|
|                                                          | Fixing solution  | Fixing time | Embedding | Antigen retrieval method | Solution       | Concentration/pH/reagent | Incubation temperature | Incubation time   | Blocking                         |               |
|                                                          |                  |             |           | Method                   |                |                          |                        |                   | Blocking solution                | Blocking time |
| ACTH                                                     | 10% For          | Unknown     | P         | Not complied             | -              | -                        | -                      | -                 | -                                | -             |
|                                                          | 10% For          | ~1w         | P         | Not complied             | -              | -                        | -                      | -                 | Block Ace                        | ~1hr          |
| Actin, $\beta$                                           | 10% For          | Unknown     | P         | Not complied             | -              | -                        | -                      | -                 | -                                | -             |
| Actin, muscle                                            | 10% For          | ~1m         | P         | Not complied             | -              | -                        | -                      | -                 | -                                | -             |
| Actin, sarcomeric                                        | 10% For          | ~1m         | P         | Not complied             | -              | -                        | -                      | -                 | -                                | -             |
|                                                          | 10% For          | ~1w         | P         | MW                       | Citric acid BF | 0.01M                    | 70-100°C               | ~30m              | -                                | -             |
|                                                          | 10% For          | ~1w         | P         | PC                       | Citric acid BF | 10mM                     | 100°C<                 | ~10m              | Block Ace                        | ~1hr          |
| Actin, $\alpha$ -smooth muscle                           | 10% For          | Unknown     | P         | Not complied             | -              | -                        | -                      | -                 | -                                | -             |
|                                                          | 10% For          | 1y~         | P         | AU                       | Citric acid BF | -                        | 100°C<                 | ~5m               | 4% Block Ace                     | ~1hr          |
|                                                          | 10% For          | ~1w         | P         | PC                       | Citric acid BF | 0.01M                    | 100°C<                 | ~5m               | 3% H <sub>2</sub> O <sub>2</sub> | ~1hr          |
|                                                          | 10% For          | ~1m         | P         | Not complied             | -              | -                        | -                      | -                 | BSA                              | ~1hr          |
|                                                          | 10% For          | ~1w         | P         | Not complied             | -              | -                        | -                      | -                 | 2% BSA/PBS                       | ~1hr          |
|                                                          | 10% For          | ~1w         | P         | PC                       | Citric acid BF | 10mM                     | 100°C<                 | ~10m              | Block Ace                        | ~1hr          |
|                                                          | 10% For          | ~1w         | P         | PC                       | Citric acid BF | 10mM                     | 100°C<                 | ~10m              | Reagent in kit                   | ~1hr          |
|                                                          | 10% For          | ~1m         | P         | Not complied             | -              | -                        | -                      | -                 | -                                | -             |
|                                                          | 10% For          | ~1d         | P         | Not complied             | -              | -                        | -                      | -                 | 5% Skim milk in PBS              | ~1hr          |
|                                                          | 10% For          | ~1m         | P         | MW                       | Citric acid BF | -                        | 100°C<                 | ~30m              | -                                | -             |
|                                                          | 10% For          | ~1w         | P         | MW                       | Citric acid BF | 0.1M                     | 100°C<                 | ~30m              | No information                   | -             |
|                                                          | 10% For          | ~1w         | P         | AU                       | Tris BF        | -                        | 100°C<                 | ~10m              | Blocking One                     | ~1hr          |
|                                                          | 10% For          | ~1y         | P         | Not complied             | -              | -                        | -                      | -                 | 0.5% Casein/PBS                  | ~1hr          |
|                                                          | 10% For          | Unknown     | P         | MW or not complied       | Citric acid BF | -                        | Unknown                | ~10m              | Block Ace                        | ~1hr          |
| 10% For                                                  | ~1w              | P           | Boil      | Distilled water          | -              | 70-100°C                 | ~30m                   | -                 | -                                |               |
| 10% For                                                  | ~1w              | P           | MW        | EDTA                     | 1mM            | 100°C<                   | ~30m                   | 2.5% Normal serum | ~1hr                             |               |
| Adipophilin                                              | 10% For          | 1y~         | P         | AU                       | Citric acid BF | -                        | 100°C<                 | ~5m               | 4% Block Ace                     | ~1hr          |
|                                                          | 10% For          | ~1w         | P         | MW                       | Citric acid BF | -                        | 100°C<                 | ~30m              | 2.5% Normal serum                | ~1hr          |
|                                                          | 10% For          | ~O/N        | P         | PC                       | Citric acid BF | -                        | 70-100°C               | ~10m              | Goat Serum                       | 30min         |
|                                                          | 10% For          | ~1w         | P         | PC                       | Citric acid BF | 10mM                     | 100°C<                 | ~10m              | Block Ace                        | ~1hr          |
|                                                          | 10% For          | ~1d         | F         | Not complied             | -              | -                        | -                      | -                 | 5% Skim milk in PBS              | ~1hr          |
|                                                          | 10% For          | ~1m         | P         | Not complied             | -              | -                        | -                      | -                 | Goat Serum                       | ~1hr          |
|                                                          | 10% For          | ~1w         | P         | PC                       | -              | -                        | 100°C<                 | ~10m              | Block Ace                        | ~1hr          |
|                                                          | 10% For          | ~1y         | P         | MW                       | -              | -                        | 100°C<                 | ~5m               | 10% Goat Serum                   | ~1hr          |
|                                                          | 10% For          | ~1y         | P         | MW                       | -              | -                        | 100°C<                 | ~5m               | 10% Goat Serum                   | ~1hr          |
|                                                          | 10% For          | ~1w         | P         | AU                       | Citric acid BF | -                        | 100°C<                 | ~30m              | No information                   | -             |
| 10% For                                                  | ~1m              | P           | AU        | Citric acid BF           | pH6.0          | 100°C<                   | ~10m                   | Goat Serum        | ~1hr                             |               |
| Albumin                                                  | 10% For          | ~1d         | P         | Proteinase               | Dako RTU       | -                        | RT                     | ~10m              | 2% BSA/PBS                       | ~1hr          |
| Amylase 2A                                               | 10% For          | ~1d         | P         | PC                       | Citric acid BF | -                        | 70-100°C               | ~10m              | Normal serum                     | 30min         |
| $\beta$ -Amyloid                                         | 10% For          | Unknown     | P         | Insuccation              | Formic acid    | 70%                      | RT                     | ~30m              | Block Ace                        | ~1hr          |
|                                                          | PFA              | ~1w         | P         | Insuccation              | Formic acid    | 90%                      | RT                     | ~5m               | -                                | -             |
| Androgen receptor                                        | 10% For          | Unknown     | P         | MW                       | Citric acid BF | -                        | 70-100°C               | ~30m              | Block Ace                        | ~1hr          |
| Anti-Human Macrophage Scavenger Receptor A (MSR-A:CD204) | 10% For          | ~2d         | P         | MW                       | Citric acid BF | pH9.0                    | -                      | ~30m              | -                                | -             |
| Aquaporin 1                                              | 10% For          | ~O/N        | P         | Boil                     | Citric acid BF | 10mM pH6.0               | 70-100°C               | ~60m              | Skim milk                        | ~1hr          |
|                                                          | 10% For          | ~1m         | P         | AU                       | Citric acid BF | pH6.0                    | 100°C<                 | ~10m              | Goat Serum                       | ~1hr          |
|                                                          | 10% For          | ~1w         | P         | AU                       | Citric acid BF | -                        | 100°C<                 | ~30m              | Protein block serum              | 30min         |

Supplementary Table 1-3 Immunological properties of primary antibodies and their respective IHC staining conditions

| Primary antibody                                         | Secondary antibody                                       |  |                     |             |                 |             |                                  | Supplementary information | Figure No. |                 |
|----------------------------------------------------------|----------------------------------------------------------|--|---------------------|-------------|-----------------|-------------|----------------------------------|---------------------------|------------|-----------------|
| Antibody                                                 | Secondary antibody information                           |  | Supplier            | Catalog No. | Incubation time | Temperature | Reagent                          |                           |            | Incubation time |
|                                                          | Product                                                  |  |                     |             |                 |             |                                  |                           |            |                 |
| ACTH                                                     | Histofine Simple Stain Rat MAX-PO(MULTI)                 |  | Nichirei            | 414191      | ~30m            | RT          | DAB                              | No information            | -          |                 |
|                                                          | Histofine Simple Stain Rat MAX-PO(MULTI)                 |  | Nichirei            | 414191      | ~30m            | RT          | DAB                              | -10m                      | -          |                 |
| Actin, $\beta$                                           | Histofine Simple Stain Rat MAX-PO(MULTI)                 |  | Nichirei            | 414191      | -               | -           | -                                | No information            | -          |                 |
| Actin, muscle                                            | Histofine Simple Stain Rat MAX-PO(M)                     |  | Nichirei            | 414171      | ~30m            | RT          | DAB                              | ~5m                       | -          |                 |
| Actin, sarcomeric                                        | Histofine Simple Stain Rat MAX-PO(M)                     |  | Nichirei            | 414171      | ~30m            | RT          | DAB                              | ~5m                       | -          |                 |
|                                                          | -                                                        |  | Agilent Technology  | E0413       | ~30m            | RT          | DAB                              | ~5m                       | -          |                 |
|                                                          | Histofine Simple Stain Rat MAX-PO(MULTI)                 |  | Nichirei            | 414191      | ~30m            | RT          | DAB                              | ~20m                      | -          |                 |
| Actin, $\alpha$ -smooth muscle                           | -                                                        |  | Nichirei            | -           | ~30m            | RT          | DAB                              | No information            | -          |                 |
|                                                          | EnVision+/HRP, Mouse                                     |  | Agilent Technology  | -           | ~30m            | 37°C        | DAB                              | ~3m                       | -          |                 |
|                                                          | EnVision+ Dual Link, Single Reagents, HRP                |  | Agilent Technology  | K4063       | ~30m            | RT          | DAB                              | ~1m                       | 1          |                 |
|                                                          | Histofine Simple Stain Rat MAX-PO(M)                     |  | Nichirei            | 414171      | ~30m            | RT          | DAB                              | ~1m                       | -          |                 |
|                                                          | Histofine Simple Stain Rat MAX-PO(MULTI) (Histo Stainer) |  | Nichirei            | 714191      | ~30m            | RT          | DAB                              | ~10m                      | -          |                 |
|                                                          | Histofine Simple Stain Rat MAX-PO(MULTI)                 |  | Nichirei            | 414191      | ~30m            | RT          | DAB                              | ~10m                      | -          |                 |
|                                                          | Histofine mouse Stain Kit                                |  | Nichirei            | 414321      | ~10m            | RT          | DAB                              | ~10m                      | -          |                 |
|                                                          | Histofine Simple Stain Rat MAX-PO(M)                     |  | Nichirei            | 414171      | ~30m            | RT          | DAB                              | ~5m                       | -          |                 |
|                                                          | Histofine Simple Stain Rat MAX-PO(M)                     |  | Nichirei            | 414171      | ~60m            | RT          | DAB                              | ~10m                      | -          |                 |
|                                                          | EnVision+ Dual Link, Single Reagents, HRP                |  | Agilent Technology  | K4063       | ~30m            | RT          | DAB                              | ~3m                       | -          |                 |
|                                                          | Histofine Simple Stain MAX-PO(M)                         |  | Nichirei            | 424131      | ~30m            | RT          | DAB                              | ~10m                      | -          |                 |
|                                                          | Histofine Simple Stain MAX-PO(MULTI)                     |  | Nichirei            | 424154      | ~30m            | 37°C        | DAB                              | ~3m                       | -          |                 |
|                                                          | Histofine mouse Stain Kit                                |  | Nichirei            | 414321      | ~10m            | RT          | DAB                              | ~10m                      | 2          |                 |
|                                                          | Histofine Simple Stain Rat MAX-PO(MULTI)                 |  | Nichirei            | 414191      | ~30m            | RT          | DAB                              | ~3m                       | -          |                 |
| Adipophilin                                              | Envision+ / HRP, RUO Rabbit                              |  | Agilent Technology  | K4003       | ~30m            | RT          | DAB                              | ~5m                       | -          |                 |
|                                                          | VECTOR ImmPRESS HRP REAGENT Anti-Rabbit IgG              |  | Vector Laboratories | MP-7451     | ~30m            | RT          | ImmPACT NovaRED                  | ~3m                       | -          |                 |
|                                                          | Goat Anti-Guinea Pig IgG Antibody (H+L), Biotinylated    |  | Vector Laboratories | BA-7000     | ~30m            | 37°C        | DAB                              | ~1m                       | -          |                 |
|                                                          | VECTASTAIN ABC-HRP Kit, Peroxidase (Guinea pig IgG)      |  | Vector Laboratories | PK-4007     | ~30m            | RT          | DAB                              | ~3m                       | -          |                 |
|                                                          | VECTASTAIN ABC-HRP Kit, Peroxidase (Guinea pig IgG)      |  | Vector Laboratories | PK-4007     | ~30m            | RT          | DAB                              | ~1m                       | -          |                 |
|                                                          | Histofine Simple Stain Mouse MAX-PO(R)                   |  | Nichirei            | 414341      | ~30m            | RT          | DAB                              | ~10m                      | -          |                 |
|                                                          | Histofine Simple Stain Rat MAX-PO(M)                     |  | Nichirei            | 414171      | ~60m            | RT          | DAB                              | ~10m                      | 3          |                 |
|                                                          | Histofine Simple Stain Rat MAX-PO(MULTI)                 |  | Nichirei            | 414191F     | ~30m            | RT          | DAB                              | ~1m                       | -          |                 |
|                                                          | Histofine Simple Stain Rat MAX-PO(MULTI)                 |  | Nichirei            | 414191      | ~30m            | RT          | DAB                              | ~10m                      | -          |                 |
|                                                          | Histofine Histofine Simple Stain AP(M)                   |  | Nichirei            | 414241      | ~30m            | RT          | NF(New Fuchsin Substrate System) | ~5m                       | -          |                 |
|                                                          | EnVision+/HRP, Mouse                                     |  | Agilent Technology  | -           | ~30m            | RT          | DAB                              | ~20s                      | -          |                 |
|                                                          | VECTASTAIN Elite ABC Kit(mouse)                          |  | Vector Laboratories | PK-6102     | ~30m            | RT          | DAB                              | ~5m                       | 4          |                 |
|                                                          | Histofine Simple Stain MAX-PO(MULTI)                     |  | Nichirei            | 414131F     | ~30m            | RT          | DAB                              | ~1m                       | -          |                 |
| Albumin                                                  | Histofine Simple Stain Rat MAX-PO(MULTI) (Histo Stainer) |  | Nichirei            | 714191      | ~30m            | RT          | DAB                              | ~10m                      | -          |                 |
| Amylase 2A                                               | VECTASTAIN Elite ABC Kit(rabbit IgG)                     |  | Vector Laboratories | PK-6101     | ~30m            | RT          | DAB                              | ~30s                      | -          |                 |
| $\beta$ -Amyloid                                         | Histofine mouse Stain Kit                                |  | Nichirei            | 414321      | ~10m            | RT          | DAB                              | ~10m                      | -          |                 |
|                                                          | Peroxidase-labeled streptavidin                          |  | Nichirei            | 426062      | ~5m             | RT          | DAB                              | ~30s                      | -          |                 |
| Androgen receptor                                        | VECTASTAIN Elite ABC Kit(mouse IgG)                      |  | Vector Laboratories | PK-6102     | ~30m            | RT          | DAB                              | ~10m                      | -          |                 |
| Anti-Human Macrophage Scavenger Receptor A (MSR-A:CD204) | EnVision+ Dual Link, Single Reagents, HRP                |  | Agilent Technology  | K4063       | ~60m            | RT          | DAB                              | ~3m                       | 5          |                 |
| Aquaporin 1                                              | EnVision+/HRP, Mouse                                     |  | Agilent Technology  | -           | ~60m            | RT          | DAB                              | ~5m                       | 6          |                 |
|                                                          | Histofine Simple Stain MAX-PO(MULTI)                     |  | Nichirei            | 414131F     | ~30m            | RT          | DAB                              | ~1m                       | 7          |                 |
|                                                          | Envision+ / HRP, RUO Rabbit                              |  | Agilent Technology  | K4002       | ~30m            | RT          | DAB                              | ~5m                       | 8          |                 |

Supplementary Table 2-1 Immunological properties of primary antibodies and their respective IHC staining conditions

| Primary antibody         |             |                              |                  |           |             |                    |    |    |    |     |     |    |                   |          |                 |             |                                             |                                             |            |   |
|--------------------------|-------------|------------------------------|------------------|-----------|-------------|--------------------|----|----|----|-----|-----|----|-------------------|----------|-----------------|-------------|---------------------------------------------|---------------------------------------------|------------|---|
| Antibody                 |             |                              |                  |           |             | Species reactivity |    |    |    |     |     |    |                   | Dilution | Incubation time | Temperature | Supplementary information                   | Positive control                            | Reactivity |   |
| Antigen                  | Clone       | Supplier                     | Catalog No.      | Clonality | Host animal | Rt                 | Mo | Rb | GP | Pri | Dog | Sw | Other             |          |                 |             |                                             |                                             |            |   |
| Aquaporin 2              | -           | Prosci                       | 50-225           | PoAb      | Rb          | ○                  | -  | -  | -  | -   | -   | -  | -                 | ~×1/1000 | O/N             | 4°C         | -                                           | Kidney                                      | ○          |   |
| ATG5                     | -           | Novus Biologicals            | NB110-53818      | PoAb      | Rb          | ○                  | -  | -  | -  | -   | -   | -  | -                 | ~×1/500  | ~60m            | RT          | -                                           | Kidney                                      | ○          |   |
| ATP synthase C           | SCMAS       | Abcam plc                    | ab181243         | MoAb      | Rb          | -                  | ○  | -  | -  | -   | -   | -  | -                 | ~×1/200  | ~60m            | RT          | Diluted with IMMUNOSHOT immunostaining Fine | Brain                                       | ○          |   |
| Bcl-2                    | I24         | Agilent Technology           | M088701-2        | MoAb      | Mo          | ○                  | -  | -  | -  | -   | -   | -  | -                 | ~×1/100  | O/N             | 4°C         | -                                           | Spleen                                      | ○          |   |
| BCRP                     | BXP-53      | Enzo Life Sciences           | ALX-801-036-C050 | MoAb      | Rt          | ○                  | ○  | -  | -  | -   | ○   | -  | -                 | ~×1/1000 | ~60m            | 4°C         | -                                           | Liver                                       | ○          |   |
|                          | BXP-21      | Cell Science                 | MON9041          | MoAb      | Mo          | -                  | -  | -  | -  | -   | -   | -  | Xenograft (Human) | ~×1/1000 | ~60m            | RT          | -                                           | Other                                       | ○          |   |
| BrdU                     | Bu20a       | Agilent Technology           | M074401-8        | MoAb      | Mo          | ○                  | ○  | -  | -  | -   | -   | -  | -                 | ~×1/1000 | O/N             | 4°C         | -                                           | Thymus                                      | ○          |   |
|                          |             |                              |                  | MoAb      | Mo          | ○                  | -  | -  | -  | -   | -   | -  | -                 | -        | ~×1/100         | O/N         | 4°C                                         | -                                           | Testis     | ○ |
|                          |             |                              |                  | MoAb      | Mo          | ○                  | -  | -  | -  | -   | -   | -  | -                 | -        | ~×1/100         | ~60m        | RT                                          | -                                           | Liver      | ○ |
|                          | IIB5        | Abcam plc                    | ab8955           | MoAb      | Mo          | ○                  | ○  | -  | -  | -   | -   | -  | -                 | ~×1/1000 | O/N             | 4°C         | -                                           | Intestine                                   | ○          |   |
| N-cadherin               | 3B9         | Thermo Fisher Scientific     | 33-3900          | MoAb      | Mo          | ○                  | -  | -  | -  | -   | ○   | -  | -                 | ~×1/1000 | ~60m            | RT          | -                                           | Kidney                                      | ○          |   |
|                          |             |                              |                  | MoAb      | Mo          | -                  | ○  | -  | -  | -   | -   | -  | -                 | -        | ~×1/100         | ~60m        | RT                                          | -                                           | Kidney     | ○ |
| Calbindin D28K           | CB-955      | Sigma-Aldrich                | C9848            | MoAb      | Mo          | -                  | ○  | -  | -  | -   | -   | -  | -                 | ~×1/1000 | O/N             | 4°C         | -                                           | Brain                                       | ○          |   |
|                          |             | Abcam plc                    | ab82812          | MoAb      | Mo          | -                  | -  | ○  | -  | -   | -   | -  | -                 | ~×1/1000 | ~60m            | RT          | -                                           | Eye                                         | ○          |   |
|                          | D114Q       | Cell Signaling Technology    | #13176           | MoAb      | Rb          | ○                  | -  | -  | -  | ○   | -   | -  | -                 | ~×1/1000 | O/N             | 4°C         | -                                           | Kidney                                      | ○          |   |
| Calponin                 | CALP        | Thermo Scientific            | MA5-11620        | MoAb      | Mo          | ○                  | -  | -  | -  | -   | ○   | -  | -                 | ~×1/1000 | ~60m            | RT          | -                                           | Mammary                                     | ○          |   |
|                          | hCP         | Sigma-Aldrich                | C2687            | MoAb      | Mo          | -                  | -  | -  | -  | -   | ○   | -  | -                 | ~×1/1000 | O/N             | 4°C         | -                                           | Mammary                                     | ○          |   |
| Calretinin               | DAK-Calret1 | Agilent Technology           | M724501-2        | MoAb      | Mo          | ○                  | -  | -  | -  | -   | -   | -  | -                 | ~×1/50   | ~30m            | RT          | -                                           | Lung                                        | ○          |   |
|                          | 6B8.2       | Merck                        | MAB1568          | MoAb      | Mo          | -                  | -  | ○  | -  | -   | -   | -  | -                 | ~×1/500  | ~60m            | RT          | -                                           | Eye                                         | ○          |   |
| Carcinoembryonic Antigen | II -7       | Agilent Technology           | M707201-2        | MoAb      | Mo          | -                  | -  | -  | -  | -   | ○   | -  | -                 | ~×1/25   | O/N             | 4°C         | -                                           | Intestine                                   | ○          |   |
| Caspase-3                | -           | Promega                      | G748             | PoAb      | Rb          | ○                  | ○  | -  | -  | -   | -   | -  | -                 | ~×1/200  | ~60m            | RT          | -                                           | Spleen                                      | ○          |   |
|                          | -           | Cell Signaling Technology    | 9662             | PoAb      | Rb          | ○                  | -  | -  | -  | -   | -   | -  | -                 | ~×1/200  | O/N             | 4°C         | -                                           | Other                                       | ○          |   |
| Cleaved Caspase-3        | -           | Cell Signaling Technology    | 9661(S)          | PoAb      | Rb          | ○                  | ○  | -  | -  | -   | -   | -  | -                 | ~×1/1000 | O/N             | 4°C         | -                                           | Intestine                                   | ○          |   |
|                          |             |                              |                  | PoAb      | Rb          | ○                  | ○  | -  | -  | -   | ○   | -  | -                 | -        | ~×1/200         | ~60m        | RT                                          | -                                           | Thymus     | ○ |
|                          |             |                              |                  | PoAb      | Rb          | ○                  | -  | -  | -  | -   | -   | -  | -                 | -        | ~×1/500         | ~30m        | RT                                          | Diluted with IMMUNOSHOT immunostaining Fine | Thymus     | ○ |
|                          |             |                              |                  | PoAb      | Rb          | -                  | ○  | -  | -  | -   | -   | -  | -                 | -        | ~×1/500         | ~30m        | RT                                          | Diluted with IMMUNOSHOT immunostaining Fine | Thymus     | ○ |
| Catalase                 | -           | Abcam plc                    | ab16731          | PoAb      | Rb          | ○                  | -  | -  | -  | -   | -   | -  | -                 | ~×1/200  | ~60m            | RT          | -                                           | Liver                                       | ○          |   |
|                          | -           |                              |                  | PoAb      | Rb          | -                  | ○  | -  | -  | -   | -   | -  | -                 | -        | ~×1/200         | ~60m        | RT                                          | -                                           | Liver      | ○ |
| β catenin                | E247        | Abcam plc                    | ab32572          | MoAb      | Rb          | -                  | ○  | -  | -  | -   | -   | -  | -                 | ~×1/500  | ~60m            | RT          | Diluted with IMMUNOSHOT immunostaining Fine | Lung                                        | ○          |   |
|                          |             |                              |                  | MoAb      | Rb          | -                  | -  | -  | -  | -   | -   | -  | Marmoset          | ~×1/500  | ~60m            | RT          | Diluted with IMMUNOSHOT immunostaining Fine | Lung                                        | ○          |   |
|                          | 14          | BD Transduction Laboratories | 610153           | MoAb      | Mo          | -                  | ○  | -  | -  | -   | -   | -  | -                 | ~×1/1000 | O/N             | 4°C         | -                                           | Intestine                                   | ○          |   |
|                          |             |                              |                  | MoAb      | Mo          | -                  | ○  | -  | -  | -   | -   | -  | -                 | ~×1/1000 | O/N             | 4°C         | -                                           | Intestine                                   | ○          |   |
| Cathepsin K              | -           | Abcam plc                    | ab19027          | MoAb      | Mo          | ○                  | -  | -  | -  | -   | -   | -  | -                 | ~×1/100  | O/N             | 4°C         | -                                           | Intestine                                   | ○          |   |
|                          |             |                              |                  | PoAb      | Rb          | -                  | ○  | -  | -  | -   | -   | -  | -                 | -        | ~×1/200         | ~60m        | RT                                          | -                                           | Bone       | ○ |

Supplementary Table 2-2 Immunological properties of primary antibodies and their respective IHC staining conditions

| Antibody                 | Primary antibody |             |           |                          |                                 |                          |                        |                 |                                                 |               |
|--------------------------|------------------|-------------|-----------|--------------------------|---------------------------------|--------------------------|------------------------|-----------------|-------------------------------------------------|---------------|
|                          | Fixing solution  | Fixing time | Embedding | Antigen retrieval method | Solution                        | Concentration/pH/reagent | Incubation temperature | Incubation time | Blocking                                        |               |
|                          |                  |             |           | Method                   |                                 |                          |                        |                 | Blocking solution                               | Blocking time |
| Aquaporin 2              | 10% For          | ~1w         | P         | AU                       | Citric acid BF                  | -                        | 100°C<                 | ~30m            | Protein block serum                             | 30min         |
| ATG5                     | PFA              | ~2d         | P         | AU                       | Citric acid BF                  | -                        | 100°C<                 | ~30m            | 3% H <sub>2</sub> O <sub>2</sub> /Protein Block | ~1hr          |
| ATP synthase C           | 10% For          | ~1w         | P         | Not complied             | -                               | -                        | -                      | -               | Block Ace                                       | ~1hr          |
| Bcl-2                    | 10% For          | Unknown     | P         | MW                       | Citric acid BF                  | -                        | -                      | ~30m            | -                                               | -             |
| BCRP                     | 10% For          | ~1w         | P         | AU                       | Distilled water                 | -                        | 100°C<                 | ~10m            | Rabbit serum                                    | ~1hr          |
|                          | 10% For          | ~1w         | P         | AU                       | Citric acid BF                  | 0.01M                    | 100°C<                 | ~30m            | Rabbit serum                                    | ~1hr          |
| BrdU                     | 10% For          | ~O/N        | P         | Proteinase               | -                               | 0.4mg/mL                 | RT                     | ~30m            | 4% Block Ace                                    | ~1hr          |
|                          | 10% For          | ~1m         | P         | Proteinase               | -                               | 0.05mol/L                | RT                     | ~10m            | -                                               | -             |
|                          | 10% For          | ~1y         | P         | PC                       | Citric acid BF                  | -                        | 100°C<                 | ~5m             | Skim milk                                       | ~1hr          |
|                          | 10% For          | ~O/N        | P         | PC                       | Citric acid BF                  | -                        | 70-100°C               | ~10m            | Normal serum                                    | 30min         |
|                          | 10% For          | ~1d         | P         | MW                       | Citric acid BF                  | -                        | 70-100°C               | ~30m            | Block Ace                                       | ~1hr          |
|                          | 10% For          | ~1w         | P         | MW                       | Citric acid BF                  | 0.01M                    | 70-100°C               | ~30m            | -                                               | -             |
| N-cadherin               | 10% For          | ~1m         | P         | AU                       | Citric acid BF                  | pH6.0                    | 100°C<                 | ~10m            | Goat Serum                                      | ~1hr          |
|                          | 10% For          | ~1m         | P         | AU                       | Citric acid BF                  | pH6.0                    | 100°C<                 | ~10m            | Goat Serum                                      | ~1hr          |
| Calbindin D28K           | 4% Zinc For      | ~2d         | P         | MW                       | Citric acid BF                  | -                        | 100°C<                 | ~30m            | -                                               | -             |
|                          | DA               | ~1d         | P         | MW                       | Citric acid BF                  | -                        | 100°C<                 | ~30m            | 3% H <sub>2</sub> O <sub>2</sub> /Protein Block | ~1hr          |
|                          | 10% For          | ~1w         | P         | Boil                     | Citric acid BF                  | -                        | 70-100°C               | ~30m            | No information                                  | -             |
|                          | 10% For          | ~O/N        | P         | Boil                     | Citric acid BF                  | 10mM pH6.0               | 70-100°C               | ~60m            | Skim milk                                       | ~1hr          |
| Calponin                 | 10% For          | ~1d         | P         | MW                       | Citric acid BF                  | 0.01M                    | 70-100°C               | ~30m            | 5% Skim milk in PBS                             | ~1hr          |
|                          | 10% For          | ~1w         | P         | AU                       | Citric acid BF                  | -                        | 100°C<                 | ~30m            | 10% Goat Serum                                  | ~1hr          |
| Calretinin               | 10% For          | ~1m         | P         | Boil                     | Citric acid BF                  | -                        | 70-100°C               | ~30m            | -                                               | -             |
|                          | DA               | ~1d         | P         | MW                       | Citric acid BF                  | -                        | 100°C<                 | ~30m            | 3% H <sub>2</sub> O <sub>2</sub> /Protein Block | ~1hr          |
| Carcinoembryonic Antigen | 10% For          | ~1w         | P         | AU                       | Tris BF                         | -                        | 100°C<                 | ~10m            | Blocking One                                    | ~1hr          |
| Caspase-3                | DA               | ~O/N        | P         | MW                       | Immunosaver                     | -                        | 100°C<                 | ~5m             | 2% BSA/PBS                                      | ~1hr          |
|                          | 10% For          | Unknown     | P         | MW                       | Citric acid BF                  | -                        | -                      | -               | -                                               | -             |
| Cleaved Caspase-3        | 10% For          | ~1w         | P         | AU                       | EDTA                            | 1mM                      | 100°C<                 | ~30m            | -                                               | -             |
|                          | 10% For          | ~1w         | P         | MW                       | EDTA                            | 1mM                      | 100°C<                 | ~30m            | 2.5% Normal serum                               | ~1hr          |
|                          | 10% For          | ~1w         | P         | PC                       | -                               | -                        | 100°C<                 | ~10m            | Block Ace                                       | ~1hr          |
|                          | 10% For          | ~1w         | P         | PC                       | -                               | -                        | 100°C<                 | ~5m             | Block Ace                                       | ~1hr          |
|                          | 10% For          | Unknown     | P         | MW                       | Citric acid BF                  | -                        | -                      | ~30m            | -                                               | -             |
| Catalase                 | 10% For          | ~1w         | P         | PC                       | Target Retrieval Solution, pH 9 | -                        | 100°C<                 | ~10m            | Block Ace                                       | ~1hr          |
|                          | 10% For          | ~1w         | P         | PC                       | Citric acid BF                  | 10mM                     | 100°C<                 | ~10m            | Block Ace                                       | ~1hr          |
| β catenin                | 10% For          | ~1w         | P         | PC                       | Target Retrieval Solution, pH 9 | -                        | 100°C<                 | ~10m            | Block Ace                                       | ~1hr          |
|                          | 10% For          | ~10d        | P         | PC                       | -                               | -                        | 100°C<                 | ~10m            | Block Ace                                       | ~1hr          |
|                          | 10% For          | ~1w         | P         | PC                       | Citric acid BF                  | 0.01M                    | 100°C<                 | ~5m             | 3% H <sub>2</sub> O <sub>2</sub>                | ~1hr          |
|                          | 10% For          | ~1d         | P         | AU                       | -                               | -                        | 100°C<                 | ~30m            | -                                               | -             |
|                          | 10% For          | ~O/N        | P         | PC                       | Citric acid BF                  | -                        | 70-100°C               | ~10m            | Normal serum                                    | 30min         |
| Cathepsin K              | 10% For          | ~1w         | P         | Boil                     | EDTA                            | 1mM                      | 70-100°C               | O/N             | -                                               | -             |

Supplementary Table 2-3 Immunological properties of primary antibodies and their respective IHC staining conditions

| Primary antibody         | Secondary antibody                                                            |                     |                |                 |             |         |                 | Supplementary information | Figure No. |
|--------------------------|-------------------------------------------------------------------------------|---------------------|----------------|-----------------|-------------|---------|-----------------|---------------------------|------------|
| Antibody                 | Secondary antibody information                                                | Supplier            | Catalog No.    | Incubation time | Temperature | Reagent | Incubation time |                           |            |
|                          | Product                                                                       |                     |                |                 |             |         |                 |                           |            |
| Aquaporin 2              | Envision+ / HRP, RUO Rabbit                                                   | Agilent Technology  | K4002          | ~30m            | RT          | DAB     | ~5m             | -                         | 9          |
| ATG5                     | Histofine Simple Stain Rat MAX-PO(R)                                          | Nichirei            | 414181         | ~60m            | RT          | DAB     | ~30s            | -                         |            |
| ATP synthase C           | Histofine Simple Stain Mouse MAX-PO(R)                                        | Nichirei            | 414341         | ~30m            | RT          | DAB     | ~10m            | -                         |            |
| Bcl-2                    | -                                                                             | -                   | -              | -               | -           | -       | No information  | -                         |            |
| BCRP                     | Unknown                                                                       | -                   | -              | -               | -           | DAB     | ~5m             | -                         |            |
|                          | Rabbit Anti-Mouse Immunoglobulins/Biotine - Rabbit F(ab)2 (affinity isolated) | Agilent Technology  | E0413          | ~30m            | RT          | DAB     | ~5m             | -                         |            |
| BrdU                     | EnVision+/HRP, Mouse                                                          | Agilent Technology  | -              | ~30m            | 37°C        | DAB     | ~3m             | -                         | 10         |
|                          | Histofine Simple Stain Rat MAX-PO(M)                                          | Nichirei            | 414171         | ~30m            | RT          | DAB     | ~5m             | -                         |            |
|                          | Histofine SAB- PO(M)                                                          | Nichirei            | 424022         | ~10m            | RT          | DAB     | ~20m            | -                         |            |
|                          | VECTASTAIN Elite ABC Kit(mouse IgG)                                           | Vector Laboratories | PK-6102        | ~30m            | RT          | DAB     | ~1m             | -                         |            |
|                          | Anti-Mouse IgG F(ab)2-Biotin antibody produced in rabbit                      | Sigma Aldrich       | SAB3701007-2MG | ~30m            | RT          | DAB     | ~5m             | -                         |            |
|                          | Rabbit Anti-Mouse Immunoglobulins/Biotine - Rabbit F(ab)2 (affinity isolated) | Agilent Technology  | E0413          | ~30m            | RT          | DAB     | ~5m             | -                         |            |
| N-cadherin               | Histofine Simple Stain MAX-PO(MULTI)                                          | Nichirei            | 414131F        | ~30m            | RT          | DAB     | ~1m             | -                         | 11         |
|                          | Histofine mouse Stain Kit                                                     | Nichirei            | 414321F        | ~30m            | RT          | DAB     | ~1m             | -                         |            |
| Calbindin D28K           | EnVision+ Dual Link, Single Reagents, HRP                                     | Agilent Technology  | K4063          | ~30m            | RT          | DAB     | ~3m             | -                         |            |
|                          | Envision+ / HRP, RUO Mouse                                                    | Agilent Technology  | K4001          | ~30m            | RT          | DAB     | ~5m             | -                         | 12         |
|                          | Histofine Simple Stain Rat MAX-PO(MULTI)                                      | Nichirei            | 414191         | ~30m            | 37°C        | DAB     | ~10m            | -                         |            |
|                          | EnVision+/HRP, Mouse                                                          | Agilent Technology  | -              | ~60m            | RT          | DAB     | ~5m             | -                         | 13         |
| Calponin                 | Histofine Simple Stain Rat MAX-PO(M)                                          | Nichirei            | 414171         | ~60m            | RT          | DAB     | ~10m            | -                         | 14         |
|                          | EnVision+/HRP, Mouse                                                          | Agilent Technology  | -              | ~30m            | RT          | DAB     | ~3m             | -                         | 15         |
| Calretinin               | Histofine Simple Stain Rat MAX-PO(M)                                          | Nichirei            | 414171         | ~30m            | RT          | DAB     | ~5m             | -                         |            |
|                          | Envision+ / HRP, RUO Mouse                                                    | Agilent Technology  | K4001          | ~30m            | RT          | DAB     | ~1m             | -                         | 16         |
| Carcinoembryonic Antigen | Histofine Simple Stain MAX-PO(MULTI)                                          | Nichirei            | 424154         | ~30m            | 37°C        | DAB     | ~3m             | -                         |            |
| Caspase-3                | Histofine Simple Stain Rat MAX-PO(MULTI) (Histo Stainer)                      | Nichirei            | 714191         | ~30m            | RT          | DAB     | ~10m            | -                         |            |
|                          | -                                                                             | -                   | -              | -               | -           | -       | No information  | -                         |            |
| Cleaved Caspase-3        | Histofine Simple Stain Rat MAX-PO(MULTI) (Histo Stainer)                      | Nichirei            | 714191         | ~30m            | RT          | DAB     | ~10m            | -                         |            |
|                          | VECTOR ImmPRESS HRP REAGENT Anti-Rabbit IgG                                   | Vector Laboratories | MP-7451        | ~30m            | RT          | DAB     | ~3m             | -                         |            |
|                          | Histofine Simple Stain Rat MAX-PO(MULTI)                                      | Nichirei            | 414191         | ~30m            | RT          | DAB     | ~5m             | -                         |            |
|                          | Histofine Simple Stain Mouse MAX-PO(R)                                        | Nichirei            | 414341         | ~30m            | RT          | DAB     | ~5m             | -                         |            |
|                          | Histofine Simple Stain Rat MAX-PO(R)                                          | Nichirei            | 414181         | -               | -           | -       | No information  | -                         |            |
| Catalase                 | Histofine Simple Stain Rat MAX-PO(MULTI)                                      | Nichirei            | 414191         | ~30m            | RT          | DAB     | ~5m             | -                         |            |
|                          | Histofine Simple Stain Mouse MAX-PO(R)                                        | Nichirei            | 414341         | ~30m            | RT          | DAB     | ~5m             | -                         |            |
| β catenin                | Histofine Simple Stain Mouse MAX-PO(R)                                        | Nichirei            | 414341         | ~30m            | RT          | DAB     | ~10m            | -                         |            |
|                          | Histofine Simple Stain MAX-PO(R)                                              | Nichirei            | 424141         | ~30m            | RT          | DAB     | ~10m            | -                         |            |
|                          | Envision+ / HRP, RUO Mouse                                                    | Agilent Technology  | K4000          | ~30m            | RT          | DAB     | ~3m             | -                         |            |
|                          | EnVision+ Dual Link, Single Reagents, HRP                                     | Agilent Technology  | K4063          | ~30m            | RT          | DAB     | ~3m             | -                         | 17         |
|                          | VECTASTAIN Elite ABC Kit(mouse IgG)                                           | Vector Laboratories | PK-6102        | ~30m            | RT          | DAB     | ~3m             | -                         |            |
| Cathepsin K              | Histofine Simple Stain Mouse MAX-PO(R)                                        | Nichirei            | 414341         | ~30m            | RT          | DAB     | ~5m             | -                         |            |

Supplementary Table 3-1 Immunological properties of primary antibodies and their respective IHC staining conditions

| Primary antibody |                    |                                      |             |           |                    |                    |      |    |    |     |     |    |          |               |                 |             |                           |                  |            |            |            |   |
|------------------|--------------------|--------------------------------------|-------------|-----------|--------------------|--------------------|------|----|----|-----|-----|----|----------|---------------|-----------------|-------------|---------------------------|------------------|------------|------------|------------|---|
| Antibody         |                    |                                      |             |           |                    | Species reactivity |      |    |    |     |     |    |          | Dilution      | Incubation time | Temperature | Supplementary information | Positive control | Reactivity |            |            |   |
| Antigen          | Clone              | Supplier                             | Catalog No. | Clonality | Host animal        | Rt                 | Mo   | Rb | GP | Pri | Dog | Sw | Other    |               |                 |             |                           |                  |            |            |            |   |
| CD3              | F7.2.38            | Agilent Technology                   | M725401-2   | MoAb      | Mo                 | -                  | -    | -  | -  | -   | ○   | -  | Cow      | ~×1/100       | ~30m            | RT          | -                         | Lymph node       | ○          |            |            |   |
|                  |                    |                                      |             | MoAb      | Mo                 | ○                  | -    | -  | -  | -   | -   | -  | -        | -             | -               | ~×1/50      | ~60m                      | RT               | -          | Spleen     | ○          |   |
|                  |                    |                                      |             | MoAb      | Mo                 | ○                  | -    | -  | -  | -   | -   | -  | -        | -             | -               | -           | ~×1/100                   | ~30m             | RT         | -          | Spleen     | ○ |
|                  |                    |                                      |             | MoAb      | Mo                 | ○                  | -    | -  | -  | -   | ○   | -  | -        | -             | -               | -           | ~×1/1000                  | ~60m             | RT         | -          | Lymph node | ○ |
|                  | SP-7               | Abcam plc                            | ab16669     | MoAb      | Rb                 | ○                  | -    | -  | -  | -   | -   | -  | -        | -             | ~×1/200         | ~60m        | RT                        | -                | Spleen     | ○          |            |   |
|                  |                    |                                      |             | MoAb      | Rb                 | ○                  | ○    | -  | -  | -   | -   | -  | -        | -             | Cat             | ~×1/100     | ~60m                      | RT               | -          | Lymph node | ○          |   |
|                  | -                  | Abcam plc                            | ab5690      | PoAb      | Rb                 | -                  | ○    | -  | -  | -   | -   | -  | -        | -             | ~×1/100         | ~30m        | RT                        | -                | Lymph node | ○          |            |   |
|                  |                    |                                      |             | PoAb      | Rb                 | -                  | -    | -  | -  | -   | -   | ○  | -        | -             | -               | Prediluted  | ~60m                      | 37°C             | -          | Spleen     | ○          |   |
|                  | -                  | Agilent Technology                   | IS50330-2J  | PoAb      | Rb                 | -                  | -    | -  | -  | -   | ○   | -  | -        | -             | Prediluted      | ~60m        | RT                        | -                | Spleen     | ○          |            |   |
|                  |                    |                                      |             | PoAb      | Rb                 | ○                  | -    | -  | -  | -   | -   | -  | -        | -             | -               | Prediluted  | ~30m                      | RT               | -          | Lymph node | ○          |   |
|                  | -                  | Sigma-Aldrich                        | C7930       | PoAb      | Rb                 | -                  | -    | -  | -  | -   | ○   | ○  | -        | -             | ~×1/1000        | O/N         | 4°C                       | -                | Lymph node | ○          |            |   |
|                  |                    |                                      |             | PoAb      | Sh                 | ○                  | ○    | -  | -  | -   | -   | -  | -        | -             | -               | ~×1/100     | ~30m                      | RT               | -          | Spleen     | ○          |   |
|                  | -                  | Santa Cruz Biotechnology, Inc.       | sc-1127     | PoAb      | Sh                 | ○                  | ○    | -  | -  | -   | -   | -  | -        | -             | ~×1/100         | ~30m        | RT                        | -                | Spleen     | ○          |            |   |
|                  |                    |                                      |             | MoAb      | Rt                 | -                  | ○    | -  | -  | -   | -   | -  | -        | -             | -               | ~×1/100     | ~30m                      | RT               | -          | Lymph node | ○          |   |
| -                | Agilent Technology | M725429-2                            | MoAb        | Mo        | -                  | -                  | -    | -  | -  | -   | ○   | -  | Cow, Cat | ~×1/50        | O/N             | 4°C         | -                         | Lymph node       | ○          |            |            |   |
|                  |                    |                                      | MoAb        | Rb        | ○                  | ○                  | -    | -  | -  | -   | -   | -  | -        | -             | Prediluted      | O/N         | 4°C                       | -                | Spleen     | ○          |            |   |
| CD3e             | -                  | Nichirei Biosciences                 | 413591      | MoAb      | Rb                 | ○                  | ○    | -  | -  | -   | -   | -  | -        | Prediluted    | O/N             | 4°C         | -                         | Spleen           | ○          |            |            |   |
| CD4              | -                  | Biorbyt                              | orb4830     | PoAb      | Rb                 | ○                  | ○    | ○  | -  | -   | ×   | -  | -        | ~×1/100       | O/N             | 4°C         | -                         | Lymph node       | ○          |            |            |   |
|                  |                    |                                      |             | PoAb      | Mo                 | ○                  | -    | -  | -  | -   | -   | -  | -        | -             | ~×1/50          | O/N         | 4°C                       | -                | Lymph node | ○          |            |   |
|                  | OT110B5            | OriGene                              | TA500477    | MoAb      | Mo                 | ○                  | -    | -  | -  | -   | -   | -  | -        | ~×1/50        | O/N             | 4°C         | -                         | Lymph node       | ○          |            |            |   |
|                  | 1F6                | Nichirei Biosciences                 | 413181      | MoAb      | Mo                 | -                  | -    | -  | -  | ○   | -   | -  | -        | Prediluted    | O/N             | 4°C         | -                         | Lymph node       | ○          |            |            |   |
| -                | -                  | Santa Cruz Biotechnology, Inc.       | sc-13573    | MoAb      | Rt                 | -                  | ○    | -  | -  | -   | -   | -  | -        | ~×1/1000      | ~60m            | RT          | -                         | Lymph node       | ○          |            |            |   |
| CD10             | 56C6               | Thermo Fisher Scientific             | MA5-14050   | MoAb      | Mo                 | -                  | -    | -  | -  | -   | ○   | -  | -        | ~×1/500       | O/N             | 4°C         | -                         | Spleen           | ○          |            |            |   |
| CD11b            | OX42               | Bio-Rad Laboratories, Inc.           | MCA74G      | MoAb      | Mo                 | ○                  | -    | -  | -  | -   | -   | -  | -        | ~×1/500       | ~60m            | RT          | -                         | Liver            | ○          |            |            |   |
| CD20             | -                  | Lab Vision(Thermo Fisher Scientific) | RB-9013     | PoAb      | Rb                 | -                  | -    | -  | -  | -   | ○   | -  | Cow      | ~×1/500       | ~30m            | RT          | -                         | Lymph node       | ○          |            |            |   |
|                  |                    |                                      |             | PoAb      | Rb                 | -                  | -    | -  | -  | -   | ○   | -  | -        | -             | Cat             | ~×1/200     | ~60m                      | RT               | -          | Spleen     | ○          |   |
|                  | -                  | BIOCARE Medical LLC                  | ACR 3004 A  | PoAb      | Rb                 | -                  | -    | -  | -  | -   | ○   | -  | -        | ~×1/100       | ~60m            | RT          | -                         | Lymph node       | ○          |            |            |   |
|                  |                    |                                      |             | PoAb      | Rb                 | -                  | ○    | -  | -  | -   | -   | -  | -        | -             | -               | ~×1/500     | O/N                       | 4°C              | -          | Lymph node | ○          |   |
| CD20cy           | L26                | Agilent Technology                   | IS60430-2J  | MoAb      | Mo                 | -                  | -    | -  | -  | ○   | -   | -  | -        | Prediluted    | ~60m            | RT          | -                         | Spleen           | ○          |            |            |   |
| CD31             | -                  | Abcam plc                            | ab28364     | PoAb      | Rb                 | -                  | ○    | -  | -  | -   | -   | -  | -        | ~×1/100       | O/N             | 4°C         | -                         | Heart            | ○          |            |            |   |
|                  |                    |                                      |             | MEC13.3   | BD Pharmingen Inc. | 550274             | MoAb | Rt | -  | ○   | -   | -  | -        | -             | -               | ~×1/200     | O/N                       | 4°C              | -          | Skin       | ○          |   |
| CD34             | -                  | Boster Immunoleader                  | PA1334      | PoAb      | Rb                 | ○                  | -    | -  | -  | -   | -   | -  | -        | ~×1/200       | O/N             | 4°C         | -                         | Liver            | ○          |            |            |   |
|                  |                    |                                      |             | PoAb      | Rb                 | ○                  | ○    | -  | -  | -   | -   | -  | -        | -             | -               | ~×1/1000    | ~60m                      | RT               | -          | Intestine  | ○          |   |
| CD36             | -                  | Novus Biologicals                    | NB400-144   | PoAb      | Rb                 | ○                  | ○    | -  | -  | -   | -   | -  | -        | ~×1/1000-5000 | ~30m            | RT          | -                         | Lung             | ○          |            |            |   |
| CD45R            | RA3-6B2            | BD Pharmingen Inc.                   | 550286      | MoAb      | Rt                 | -                  | ○    | -  | -  | -   | -   | -  | -        | ~×1/50        | O/N             | 4°C         | -                         | Lymph node       | ○          |            |            |   |
|                  |                    |                                      |             | MoAb      | Rt                 | -                  | ○    | -  | -  | -   | -   | -  | -        | -             | ~×1/100         | ~60m        | RT                        | -                | Lymph node | ○          |            |   |
|                  |                    | R&D Systems                          | MAB1217     | MoAb      | Rt                 | -                  | ○    | -  | -  | -   | -   | -  | -        | -             | ~×1/100         | ~60m        | RT                        | -                | Spleen     | ○          |            |   |
|                  |                    |                                      |             | MoAb      | Rt                 | -                  | ○    | -  | -  | -   | -   | -  | -        | -             | ~×1/500         | ~60m        | RT                        | -                | Lymph node | ○          |            |   |
| CD61             | Y2/51              | Agilent Technology                   | M075301-2   | MoAb      | Mo                 | -                  | -    | -  | -  | -   | ○   | -  | ~×1/50   | O/N           | 4°C             | -           | Bone marrow               | ○                |            |            |            |   |

Supplementary Table 3-2 Immunological properties of primary antibodies and their respective IHC staining conditions

| Antibody | Primary antibody |             |           |                          |                                          |                          |                        |                     |                                                 |               |
|----------|------------------|-------------|-----------|--------------------------|------------------------------------------|--------------------------|------------------------|---------------------|-------------------------------------------------|---------------|
|          | Fixing solution  | Fixing time | Embedding | Antigen retrieval method | Solution                                 | Concentration/pH/reagent | Incubation temperature | Incubation time     | Blocking                                        |               |
|          |                  |             |           | Method                   |                                          |                          |                        |                     | Blocking solution                               | Blocking time |
| CD3      | 10% For          | ~1w         | P         | MW                       | Citric acid BF                           | 0.1M                     | 100°C<                 | ~30m                | No information                                  | -             |
|          | 10% For          | ~1w         | P         | AU                       | Citric acid BF                           | -                        | 100°C<                 | ~30m                | 3% H <sub>2</sub> O <sub>2</sub> /Protein Block | ~1hr          |
|          | 10% For          | ~1w         | P         | AU                       | Citric acid BF                           | -                        | 100°C<                 | ~30m                | -                                               | -             |
|          | 10% For          | ~1d         | P         | MW                       | Tris-EDTA (10 mM Tris/1 mM EDTA, pH 9.0) | 1mM                      | 70-100°C               | ~30m                | 5% Skim milk in PBS                             | ~1hr          |
|          | 10% For          | ~1w         | P         | AU                       | Citric acid BF                           | 0.01M or Agilent S1699   | 100°C<                 | ~30m                | -                                               | -             |
|          | 10% For          | ~1w         | P         | MW                       | Tris BF                                  | pH6.0                    | 100°C<                 | ~5m                 | 2% BSA/PBS                                      | ~1hr          |
|          | 10% For          | ~1w         | P         | AU                       | Citric acid BF                           | -                        | 100°C<                 | ~30m                | Goat Serum                                      | ~1hr          |
|          | 10% For          | 1y~         | P         | AU                       | Citric acid BF                           | -                        | 100°C<                 | ~5m                 | 4% Block Ace                                    | ~1hr          |
|          | 10% For          | ~1w         | P         | MW                       | Citric acid BF                           | -                        | 100°C<                 | ~30m                | Blocking One                                    | ~1hr          |
|          | 10% For          | ~6m         | P         | AU                       | EDTA                                     | -                        | 100°C<                 | ~5m                 | 0.5% Casein/PBS                                 | ~1hr          |
|          | 10% For          | ~1w         | P         | Proteinase               | -                                        | -                        | RT                     | ~5m                 | Block Ace                                       | ~1hr          |
|          | 10% For          | ~1w         | P         | AU                       | Citric acid BF                           | -                        | 100°C<                 | ~30m                | 10% Goat Serum                                  | ~1hr          |
|          | 10% For          | ~6m         | P         | AU                       | Tris BF                                  | -                        | 100°C<                 | ~30m                | Dako X0909                                      | ~1hr          |
| 10% For  | ~1w              | P           | PC        | Citric acid BF           | 10mM                                     | 100°C<                   | -                      | Block Ace           | ~1hr                                            |               |
| 10% For  | ~1w              | P           | AU        | Citric acid BF           | -                                        | 100°C<                   | ~30m                   | -                   | -                                               |               |
| CD3e     | 10% For          | Unknown     | P         | MW                       | Immunosaver                              | -                        | Unknown                | ~30m                | Block Ace                                       | ~1hr          |
| CD4      | 10% For          | Unknown     | P         | MW                       | Dako Target Retrieval Solution, pH 9     | -                        | -                      | ~30m                | -                                               | -             |
|          | 10% For          | Unknown     | P         | MW                       | HistoVT One                              | -                        | -                      | ~30m                | -                                               | -             |
|          | 10% For          | ~1m         | P         | Not complied             | -                                        | -                        | -                      | -                   | Goat Serum                                      | ~1hr          |
|          | -                | ~1d         | F         | Not complied             | -                                        | -                        | -                      | -                   | 2% BSA/PBS                                      | ~1hr          |
| CD10     | 10% For          | ~1w         | P         | AU                       | EDTA                                     | -                        | 100°C<                 | ~10m                | Blocking One                                    | ~1hr          |
| CD11b    | 10% For          | ~1d         | F         | Not complied             | -                                        | -                        | -                      | 5% Skim milk in PBS | ~1hr                                            |               |
| CD20     | 10% For          | ~1w         | P         | MW                       | Citric acid BF                           | 0.1M                     | 100°C<                 | ~30m                | No information                                  | -             |
|          | 10% For          | ~1w         | P         | Not complied             | -                                        | -                        | -                      | -                   | Goat Serum                                      | ~1hr          |
|          | 10% For          | Unknown     | P         | MW                       | Citric acid BF                           | 0.01M                    | 70-100°C               | ~30m                | 5% Skim milk in PBS                             | ~1hr          |
|          | 10% For          | Unknown     | P         | Not complied             | -                                        | -                        | -                      | -                   | -                                               | -             |
| CD20cy   | 10% For          | ~6m         | P         | AU                       | EDTA                                     | -                        | 100°C<                 | ~5m                 | 0.5% Casein/PBS                                 | ~1hr          |
| CD31     | 10% For          | Unknown     | P         | MW                       | Citric acid BF                           | -                        | Unknown                | ~30m                | Block Ace                                       | ~1hr          |
|          | F, Sli, 10% For  | ~1hr        | F         | Not complied             | -                                        | -                        | -                      | -                   | Swine serum(x500)                               | ~1hr          |
| CD34     | 10% For          | ~1m         | P         | PC                       | Citric acid BF                           | -                        | 100°C<                 | ~30m                | Casein                                          | O/N           |
|          | 10% For          | ~1w         | P         | AU                       | Agilent S1699                            | -                        | 100°C<                 | ~30m                | -                                               | -             |
| CD36     | 10% For          | ~1m         | P         | Boil                     | Citric acid BF                           | -                        | 70-100°C               | ~30m                | -                                               | -             |
| CD45R    | 10% For          | 1y~         | P         | AU                       | Citric acid BF                           | -                        | 100°C<                 | ~5m                 | 4% Block Ace                                    | ~1hr          |
|          | 10% For          | ~1m         | P         | Not complied             | -                                        | -                        | -                      | -                   | Goat Serum                                      | ~1hr          |
|          | 10% For          | ~1w         | P         | MW                       | Distilled water                          | -                        | 100°C<                 | ~30m                | Rabbit serum                                    | ~1hr          |
|          | 10% For          | ~1w         | P         | MW                       | Citric acid BF                           | pH6.0                    | 100°C<                 | ~10m                | 2% BSA/PBS                                      | ~1hr          |
|          | 10% For          | Unknown     | P         | MW                       | EDTA                                     | -                        | Unknown                | ~30m                | Block Ace                                       | ~1hr          |
| CD61     | 10% For          | ~1w         | P         | AU                       | Citric acid BF                           | -                        | 100°C<                 | ~10m                | Blocking One                                    | ~1hr          |



Supplementary Table 3-3 Immunological properties of primary antibodies and their respective IHC staining conditions

| Primary antibody                         |                                                                               | Secondary antibody       |             |                 |             |         |                 | Supplementary information | Figure No. |
|------------------------------------------|-------------------------------------------------------------------------------|--------------------------|-------------|-----------------|-------------|---------|-----------------|---------------------------|------------|
| Antibody                                 | Secondary antibody information                                                | Supplier                 | Catalog No. | Incubation time | Temperature | Reagent | Incubation time |                           |            |
|                                          | Product                                                                       |                          |             |                 |             |         |                 |                           |            |
| CD3                                      | Histofine Simple Stain MAX-PO(M)                                              | Nichirei                 | 424131      | ~30m            | RT          | DAB     | ~10m            | -                         |            |
|                                          | Histofine Simple Stain Rat MAX-PO(M)                                          | Nichirei                 | 414171      | ~30m            | RT          | DAB     | ~20s            | -                         |            |
|                                          | Histofine Simple Stain Rat MAX-PO(MULTI)                                      | Nichirei                 | 414191      | ~30m            | RT          | DAB     | ~30s            | 18                        |            |
|                                          | Histofine Simple Stain Rat MAX-PO(M)                                          | Nichirei                 | 414171      | ~60m            | RT          | DAB     | ~10m            | -                         |            |
|                                          | Rabbit Immunoglobulins                                                        | Agilent Technology       | E0431       | ~30m            | RT          | DAB     | ~5m             | -                         |            |
|                                          | Histofine Simple Stain Rat MAX-PO(MULTI) (Histo Stainer)                      | Nichirei                 | 714191      | ~30m            | RT          | DAB     | ~10m            | -                         |            |
|                                          | Histofine Simple Stain Rat MAX-PO(MULTI)                                      | Nichirei                 | 414191F     | ~30m            | RT          | DAB     | ~1m             | -                         |            |
|                                          | EnVision+HRP, Rabbit                                                          | Agilent Technology       | -           | ~30m            | 37°C        | DAB     | ~5m             | 19                        |            |
|                                          | Histofine Simple Stain MAX-PO(MULTI)                                          | Nichirei                 | 424154      | ~30m            | 37°C        | DAB     | ~3m             | 20                        |            |
|                                          | Histofine Simple Stain MAX-PO(R)                                              | Nichirei                 | 424141      | ~30m            | RT          | DAB     | ~10m            | -                         |            |
|                                          | Histofine Simple Stain Rat MAX-PO(MULTI)                                      | Nichirei                 | 414191      | ~30m            | RT          | DAB     | ~10m            | -                         |            |
|                                          | EnVision+HRP, Rabbit                                                          | Agilent Technology       | -           | ~30m            | RT          | DAB     | ~3m             | 21                        |            |
|                                          | Histofine Simple Stain Mouse MAX-PO(G)                                        | Nichirei                 | 414351      | ~10m            | RT          | DAB     | ~5m             | 22                        |            |
| Histofine Simple Stain Mouse MAX-PO(Rat) | Nichirei                                                                      | 414311                   | ~30m        | RT              | DAB         | ~10m    | -               |                           |            |
| LSAB Kits, Universal, HRP, Rabbit/Mouse  | Agilent Technology                                                            | K0675                    | ~10m        | RT              | DAB         | ~10s    | -               |                           |            |
| CD3e                                     | Histofine Simple Stain Rat MAX-PO(R)                                          | Nichirei                 | 414181      | ~60m            | RT          | DAB     | No information  | -                         |            |
| CD4                                      | Histofine Simple Stain Rat MAX-PO(MULTI)                                      | Nichirei                 | 414191      | ~30m            | RT          | DAB     | No information  | -                         |            |
|                                          | Histofine Simple Stain Rat MAX-PO(M)                                          | Nichirei                 | 414171      | -               | -           | -       | No information  | -                         |            |
|                                          | Histofine Simple Stain Rat MAX-PO(MULTI)                                      | Nichirei                 | 414191F     | ~30m            | RT          | DAB     | ~1m             | -                         |            |
|                                          | Histofine Simple Stain Mouse MAX-PO(Rat)                                      | Nichirei                 | 414311      | ~30m            | RT          | DAB     | ~10m            | -                         |            |
| CD10                                     | Histofine Simple Stain MAX-PO(MULTI)                                          | Nichirei                 | 424154      | ~30m            | 37°C        | DAB     | ~3m             | -                         |            |
| CD11b                                    | Histofine Simple Stain Rat MAX-PO(M)                                          | Nichirei                 | 414171      | ~60m            | RT          | DAB     | ~10m            | 23                        |            |
| CD20                                     | Histofine Simple Stain MAX-PO(R)                                              | Nichirei                 | 424141      | ~30m            | RT          | DAB     | ~10m            | -                         |            |
|                                          | Histofine Simple Stain MAX-PO(R)                                              | Nichirei                 | 424141      | ~30m            | RT          | DAB     | ~5m             | 24                        |            |
|                                          | Histofine Simple Stain Rat MAX-PO(R)                                          | Nichirei                 | 414181      | ~60m            | RT          | DAB     | ~10m            | 25                        |            |
|                                          | Histofine Simple Stain Rat MAX-PO(MULTI)                                      | Nichirei                 | 414191      | ~30m            | RT          | DAB     | ~3m             | -                         |            |
| CD20cy                                   | Histofine Simple Stain MAX-PO(M)                                              | Nichirei                 | 424131      | ~30m            | RT          | DAB     | ~10m            | 26                        |            |
| CD31                                     | Histofine Simple Stain Rat MAX-PO(MULTI)                                      | Nichirei                 | 414191      | ~30m            | RT          | DAB     | ~3m             | -                         |            |
|                                          | Chicken anti-Rat IgG (H+L) Cross-Adsorbed Secondary Antibody, Alexa Fluor 594 | Thermo Fisher Scientific | A21471      | ~30m            | 37°C        | -       | No information  | 27                        |            |
| CD34                                     | EnVision+ Dual Link, Single Reagents, HRP                                     | Agilent Technology       | K4063       | ~30m            | RT          | DAB     | ~3m             | 28                        |            |
|                                          | Rabbit Immunoglobulins                                                        | Agilent Technology       | E0431       | ~30m            | RT          | DAB     | ~5m             | -                         |            |
| CD36                                     | Histofine Simple Stain Rat MAX-PO(MULTI)                                      | Nichirei                 | 414191      | ~30m            | RT          | DAB     | ~5m             | -                         |            |
| CD45R                                    | Biotinylated Anti-Rat IgG (H+L)                                               | Vector Laboratories      | -           | ~30m            | 37°C        | DAB     | ~3m             | 29                        |            |
|                                          | Histofine Simple Stain MAX-PO(M)                                              | Nichirei                 | 414131F     | ~30m            | RT          | DAB     | ~1m             | -                         |            |
|                                          | Unknown                                                                       | -                        | -           | -               | -           | DAB     | ~5m             | -                         |            |
|                                          | Histofine Simple Stain Mouse MAX-PO(Rat)                                      | Nichirei                 | 414311      | ~30m            | RT          | DAB     | ~10m            | -                         |            |
|                                          | Histofine Simple Stain Mouse MAX-PO(Rat)                                      | Nichirei                 | 414311      | ~30m            | RT          | DAB     | ~10m            | -                         |            |
| CD61                                     | Histofine Simple Stain MAX-PO(MULTI)                                          | Nichirei                 | 424154      | ~30m            | 37°C        | DAB     | ~3m             | -                         |            |

Supplementary Table 4-1 Immunological properties of primary antibodies and their respective IHC staining conditions

|                             |                    | Primary antibody               |             |           |                    |    |    |    |    |     |     |    |          |            |                 |             |                           |                  |                    |   |
|-----------------------------|--------------------|--------------------------------|-------------|-----------|--------------------|----|----|----|----|-----|-----|----|----------|------------|-----------------|-------------|---------------------------|------------------|--------------------|---|
|                             |                    | Antibody                       |             |           | Species reactivity |    |    |    |    |     |     |    |          | Dilution   | Incubation time | Temperature | Supplementary information | Positive control | Reactivity         |   |
| Antigen                     | Clone              | Supplier                       | Catalog No. | Clonality | Host animal        | Rt | Mo | Rb | GP | Pri | Dog | Sw | Other    |            |                 |             |                           |                  |                    |   |
| CD68                        | ED1                | Bio-Rad Laboratories, Inc.     | MCA341R     | MoAb      | Mo                 | ○  | -  | -  | -  | -   | -   | -  | -        | -          | ~×1/1000        | ~60m        | RT                        | -                | Spleen             | ○ |
|                             |                    |                                | MCA341GA    | MoAb      | Mo                 | ○  | -  | -  | -  | -   | -   | -  | -        | -          | ~×1/100         | O/N         | 4°C                       | -                | Spleen             | ○ |
|                             |                    |                                | MCA341R     | MoAb      | Mo                 | ○  | -  | -  | -  | -   | -   | -  | -        | -          | ~×1/100         | O/N         | 4°C                       | -                | Spleen             | ○ |
|                             |                    |                                | MCA341GA    | MoAb      | Mo                 | ○  | -  | -  | -  | -   | -   | -  | -        | -          | ~×1/500         | O/N         | 4°C                       | -                | Nerve              | - |
|                             |                    | BMA Biomedicals                | T-3003      | MoAb      | Mo                 | ○  | -  | -  | -  | -   | -   | -  | -        | -          | ~×1/100         | O/N         | 4°C                       | -                | Lymph node         | ○ |
|                             |                    |                                |             | MoAb      | Mo                 | ○  | ○  | -  | -  | -   | -   | -  | -        | -          | ~×1/500         | O/N         | 4°C                       | -                | Other              | ○ |
|                             |                    |                                |             | MoAb      | Mo                 | ○  | -  | -  | -  | -   | -   | -  | -        | -          | ~×1/100         | O/N         | 4°C                       | -                | Spleen             | ○ |
|                             |                    | Merck                          | MAB1435     | MoAb      | Mo                 | ○  | -  | -  | -  | -   | -   | -  | -        | -          | ~×1/500         | O/N         | 4°C                       | -                | Joint (osteoclast) | ○ |
|                             |                    |                                |             | MoAb      | Mo                 | ○  | -  | -  | -  | -   | -   | -  | -        | -          | ~×1/200         | ~60m        | RT                        | -                | Eye                | ○ |
|                             |                    | Bio-Rad Laboratories, Inc.     | MCA341R     | MoAb      | Mo                 | ○  | -  | -  | -  | -   | -   | -  | -        | -          | ~×1/100         | ~60m        | RT                        | -                | Liver              | ○ |
|                             | MCA341GA           |                                |             | MoAb      | Mo                 | ○  | -  | -  | -  | -   | -   | -  | -        | ~×1/200    | ~60m            | RT          | -                         | Liver            | ○                  |   |
|                             | Abcam plc          | ab31630                        | MoAb        | Mo        | ○                  | -  | -  | -  | -  | -   | -   | -  | -        | ~×1/500    | ~30m            | RT          | -                         | Lung             | ○                  |   |
| KP1                         | Agilent Technology | M081401-2                      | MoAb        | Mo        | -                  | -  | -  | -  | ○  | -   | -   | -  | -        | ~×1/50     | O/N             | 4°C         | -                         | Lung             | ○                  |   |
|                             |                    | IS61330-2                      | MoAb        | Mo        | -                  | -  | -  | -  | ○  | -   | -   | -  | -        | Prediluted | ~60m            | RT          | -                         | Spleen           | ○                  |   |
| CD79α                       | HM57               | Abcam plc                      | ab62650     | MoAb      | Mo                 | ○  | -  | -  | -  | -   | ○   | -  | -        | ~×1/4000   | O/N             | 4°C         | -                         | Lymph node       | ○                  |   |
| CD117/c-kit                 | -                  | Agilent Technology             | A450229-2   | PoAb      | Rb                 | ○  | -  | -  | -  | -   | -   | -  | -        | ~×1/100    | ~30m            | RT          | -                         | Other            | ○                  |   |
|                             |                    |                                |             | PoAb      | Rb                 | -  | -  | -  | -  | -   | ○   | -  | -        | -          | ~×1/200         | O/N         | 4°C                       | -                | Intestine          | ○ |
|                             |                    |                                |             | PoAb      | Rb                 | -  | -  | -  | -  | -   | ○   | -  | -        | Cat        | ~×1/500         | O/N         | 4°C                       | -                | Skin               | ○ |
|                             |                    |                                |             | PoAb      | Rb                 | -  | -  | -  | -  | -   | ○   | -  | -        | -          | ~×1/500         | O/N         | 4°C                       | -                | Skin               | ○ |
|                             |                    |                                |             | PoAb      | Rb                 | -  | -  | -  | -  | -   | ○   | -  | -        | -          | ~×1/500         | ~60m        | RT                        | -                | Stomach            | ○ |
| CD138                       | 281-2              | BD Pharmingen Inc.             | 553712      | MoAb      | Rt                 | -  | ○  | -  | -  | -   | -   | -  | ~×1/1000 | O/N        | 4°C             | -           | Lymph node                | ○                |                    |   |
| CD163                       | ED2                | Bio-Rad Laboratories, Inc.     | MCA342R     | MoAb      | Mo                 | ○  | -  | -  | -  | -   | -   | -  | -        | ~×1/200    | ~60m            | RT          | -                         | Liver            | ○                  |   |
|                             |                    |                                |             | MoAb      | Mo                 | ○  | -  | -  | -  | -   | -   | -  | -        | ~×1/100    | ~30m            | RT          | -                         | Other            | ○                  |   |
|                             |                    |                                |             | MoAb      | Mo                 | ○  | -  | -  | -  | -   | -   | -  | -        | ~×1/50     | O/N             | 4°C         | -                         | Spleen           | △                  |   |
|                             |                    | BMA Biomedicals                | T-3011      | MoAb      | Mo                 | ○  | -  | -  | -  | -   | -   | -  | -        | ~×1/200    | ~60m            | RT          | -                         | Eye              | ○                  |   |
| Cdc2                        | -                  | Santa Cruz Biotechnology, Inc. | sc-54       | PoAb      | Mo                 | ○  | ○  | -  | -  | -   | -   | -  | ~×1/1000 | O/N        | 4°C             | -           | Other                     | ○                |                    |   |
| e-erb-2                     | -                  | Agilent Technology             | A048529-2   | PoAb      | Rb                 | -  | -  | -  | -  | ○   | -   | -  | ~×1/500  | O/N        | 4°C             | -           | Skin                      | ○                |                    |   |
|                             |                    |                                |             | PoAb      | Rb                 | -  | -  | -  | -  | ○   | -   | -  | -        | ~×1/200    | ~60m            | RT          | -                         | Lung             | ○                  |   |
| Chitinase 3-like 1 (CHI3L1) | -                  | Abcam plc                      | ab77528     | PoAb      | Rb                 | -  | ○  | -  | -  | -   | -   | -  | ~×1/500  | ~60m       | RT              | -           | Liver                     | ○                |                    |   |
|                             |                    |                                |             | PoAb      | Rb                 | -  | -  | -  | -  | ○   | -   | -  | -        | ~×1/200    | ~60m            | RT          | -                         | Adrenal          | ○                  |   |
| Chromogranin A              | -                  | Nichirei Biosciences           | 412751      | PoAb      | Rb                 | -  | -  | -  | -  | ○   | -   | -  | ~×1/100  | O/N        | 4°C             | -           | Pancreas                  | ○                |                    |   |
|                             |                    |                                |             | PoAb      | Rb                 | ○  | -  | -  | -  | -   | -   | -  | -        | ~×1/500    | O/N             | 4°C         | -                         | Intestine        | ○                  |   |
| Chx10                       | -                  | Exalpa biologicals             | X1180P      | PoAb      | Sh                 | ○  | -  | -  | -  | -   | -   | -  | ~×1/50   | ~60m       | 37°C            | -           | Eye                       | ○                |                    |   |
| Claudin 11                  | -                  | Novus Biologicals              | NBP1-82470  | PoAb      | Rb                 | ○  | ○  | -  | -  | -   | -   | -  | -        | ~×1/100    | O/N             | 4°C         | -                         | Testis           | ○                  |   |
|                             |                    |                                |             | PoAb      | Rb                 | ○  | ○  | -  | -  | -   | -   | -  | -        | -          | ~×1/100         | O/N         | 4°C                       | -                | Testis             | ○ |
| Clusterin                   | -                  | R&D Systems                    | AF2937      | PoAb      | Gt                 | ○  | -  | -  | -  | -   | -   | -  | -        | ~×1/50     | ~60m            | RT          | -                         | Kidney           | ○                  |   |
|                             |                    |                                |             | PoAb      | Gt                 | ○  | -  | -  | -  | -   | -   | -  | -        | -          | ~×1/50          | O/N         | 4°C                       | -                | Kidney             | ○ |
| Collagen type I             | -                  | Abcam plc                      | ab34710     | PoAb      | Rb                 | ○  | -  | -  | -  | -   | -   | -  | ~×1/200  | ~60m       | RT              | -           | Skin                      | ○                |                    |   |
|                             |                    |                                |             | PoAb      | Rb                 | -  | -  | -  | -  | -   | -   | -  | ○        | ~×1/500    | O/N             | 4°C         | -                         | Skin             | ○                  |   |
| Collagen type II            | II-4C11            | KYOWA PHARMA CHEMICAL          | F-57        | MoAb      | Mo                 | ○  | -  | -  | -  | -   | -   | -  | ~×1/100  | ~60m       | RT              | -           | Joint                     | ○                |                    |   |
|                             |                    |                                |             | MoAb      | Mo                 | -  | -  | -  | -  | -   | -   | ○  | ~×1/100  | ~60m       | RT              | -           | Joint                     | ○                |                    |   |
| Collagen type III           | FH-7A              | Abcam plc                      | ab6310      | MoAb      | Mo                 | ○  | -  | -  | -  | -   | -   | -  | ~×1/1000 | O/N        | 4°C             | -           | Skin                      | ○                |                    |   |
| Collagen type IV            | -                  | Bio-Rad Laboratories, Inc.     | 2150-1470   | PoAb      | Rb                 | ○  | ○  | -  | -  | -   | -   | -  | ~×1/500  | O/N        | 4°C             | -           | Liver (Fibrosis)          | ○                |                    |   |

Supplementary Table 4-2 Immunological properties of primary antibodies and their respective IHC staining conditions

| Antibody                    | Primary antibody |             |           |                          |                 |                          |                        |                 |                                                            |               |
|-----------------------------|------------------|-------------|-----------|--------------------------|-----------------|--------------------------|------------------------|-----------------|------------------------------------------------------------|---------------|
|                             | Fixing solution  | Fixing time | Embedding | Antigen retrieval method | Solution        | Concentration/pH/reagent | Incubation temperature | Incubation time | Blocking                                                   |               |
|                             |                  |             |           | Method                   |                 |                          |                        |                 | Blocking solution                                          | Blocking time |
| CD68                        | 10% For          | ~1w         | P         | AU                       | Citric acid BF  | 0.01M                    | 100°C<                 | ~30m            | -                                                          | -             |
|                             | 10% For          | ~4hr        | P         | Proteinase               | -               | 20µg/ml                  | -                      | -               | Swine serum(x500)                                          | ~1hr          |
|                             | 10% For          | Unknown     | P         | MW                       | Citric acid BF  | -                        | Unknown                | ~30m            | Block Ace                                                  | ~1hr          |
|                             | 10% For          | ~O/N        | P         | Trypsin                  | -               | -                        | 37°C                   | ~10m            | Normal serum                                               | 30min         |
|                             | 10% For          | Unknown     | P         | MW                       | Citric acid BF  | -                        | -                      | ~10m            | -                                                          | -             |
|                             | 10% For          | Unknown     | P         | MW                       | Citric acid BF  | -                        | Unknown                | ~30m            | Block Ace                                                  | ~1hr          |
|                             | 10% For          | ~1m         | P         | Not complied             | -               | -                        | -                      | -               | BSA                                                        | ~1hr          |
|                             | 10% For          | ~O/N        | P         | Trypsin                  | -               | -                        | 37°C                   | ~10m            | Normal serum                                               | 30min         |
|                             | 10% For          | ~1w         | P         | MW                       | Citric acid BF  | pH6.0                    | 100°C<                 | ~10m            | 2% BSA/PBS                                                 | ~1hr          |
|                             | 10% For          | ~1m         | P         | Proteinase               | -               | -                        | RT                     | ~10m            | Goat Serum                                                 | ~1hr          |
|                             | PLP              | ~O/N        | P         | Proteinase               | -               | 100µg/ml                 | RT                     | ~10m            | 5% Skim milk in PBS                                        | ~1hr          |
| 10% For                     | ~1m              | P           | Boil      | Citric acid BF           | -               | 70-100°C                 | ~30m                   | -               | -                                                          |               |
| 10% For                     | ~O/N             | P           | Boil      | Citric acid BF           | 10mM pH6.0      | 70-100°C                 | ~60m                   | Skim milk       | ~1hr                                                       |               |
| 10% For                     | ~6m              | P           | AU        | EDTA                     | -               | 100°C<                   | ~5m                    | 0.5% Casein/PBS | ~1hr                                                       |               |
| CD79α                       | 10% For          | ~1m         | P         | AU                       | Citric acid BF  | pH6.0                    | 100°C<                 | ~30m            | Goat Serum                                                 | ~1hr          |
| CD117/c-kit                 | 10% For          | ~O/N        | P         | PC                       | Citric acid BF  | -                        | 70-100°C               | ~10m            | Normal serum                                               | 30min         |
|                             | 10% For          | ~1w         | P         | AU                       | Citric acid BF  | -                        | 100°C<                 | ~30m            | 10% Goat Serum                                             | ~1hr          |
|                             | 10% For          | ~1w         | P         | AU                       | Citric acid BF  | -                        | 100°C<                 | ~30m            | -                                                          | -             |
|                             | 10% For          | ~1w         | P         | AU                       | Citric acid BF  | -                        | 100°C<                 | ~10m            | Blocking One                                               | ~1hr          |
|                             | 10% For          | ~1w         | P         | AU                       | Citric acid BF  | -                        | 100°C<                 | ~30m            | 3% H <sub>2</sub> O <sub>2</sub> /Protein Block            | ~1hr          |
| CD138                       | 10% For          | 1y~         | P         | AU                       | Citric acid BF  | -                        | 100°C<                 | ~5m             | 4% Block Ace                                               | ~1hr          |
| CD163                       | PLP              | ~O/N        | P         | Proteinase               | -               | 100µg/ml                 | RT                     | ~10m            | 5% Skim milk in PBS                                        | ~1hr          |
|                             | Zamboni          | ~1w         | P         | Proteinase               | -               | -                        | RT                     | ~10m            | Goat Serum                                                 | ~1hr          |
|                             | 10% For          | ~4hr        | P         | Proteinase               | -               | 20µg/ml                  | -                      | -               | Swine serum(x500)                                          | ~1hr          |
|                             | 10% For          | ~1w         | P         | Proteinase               | -               | Ready to use             | RT                     | ~10m            | 2% BSA/PBS                                                 | ~1hr          |
| Cdc2                        | 10% For          | Unknown     | P         | MW                       | Citric acid BF  | -                        | -                      | ~30m            | -                                                          | -             |
| e-erb-2                     | 10% For          | ~1w         | P         | AU                       | Citric acid BF  | -                        | 100°C<                 | ~10m            | Blocking One                                               | ~1hr          |
|                             | 10% For          | ~1w         | P         | AU                       | EDTA            | -                        | 100°C<                 | ~10m            | 3% H <sub>2</sub> O <sub>2</sub> /Protein Block            | ~1hr          |
| Chitinase 3-like 1 (CHI3L1) | 10% For          | ~1w         | P         | PC                       | EDTA            | -                        | 100°C<                 | ~10m            | Goat Serum                                                 | ~1hr          |
| Chromogranin A              | 10% For          | ~1d         | P         | MW                       | Citric acid BF  | 0.01M                    | 70-100°C               | ~30m            | 5% Skim milk in PBS                                        | ~1hr          |
|                             | 10% For          | ~1w         | P         | AU                       | Citric acid BF  | -                        | 100°C<                 | ~10m            | Blocking One                                               | ~1hr          |
|                             | 10% For          | ~1m         | P         | AU                       | Citric acid BF  | pH6.0                    | 100°C<                 | ~30m            | Goat Serum                                                 | ~1hr          |
| Chx10                       | PFA              | ~1d         | P         | AU                       | Citric acid BF  | -                        | 100°C<                 | ~30m            | 3% H <sub>2</sub> O <sub>2</sub> /Goat serum/Protein Block | ~1hr          |
| Claudin 11                  | 10% For          | Unknown     | P         | MW                       | Citric acid BF  | -                        | -                      | ~30m            | -                                                          | -             |
|                             | 10% For          | Unknown     | P         | MW                       | Citric acid BF  | -                        | -                      | ~30m            | -                                                          | -             |
| Clusterin                   | PFA              | ~2d         | P         | AU                       | Citric acid BF  | -                        | 100°C<                 | ~10m            | 3% H <sub>2</sub> O <sub>2</sub> /Protein Block            | ~1hr          |
|                             | 10% For          | Unknown     | P         | Not complied             | -               | -                        | -                      | -               | Block Ace                                                  | ~1hr          |
| Collagen type I             | 10% For          | ~1w         | P         | MW                       | Immunosaver     | -                        | 70-100°C               | ~30m            | -                                                          | -             |
|                             | 10% For          | ~1m         | P         | Not complied             | -               | -                        | -                      | -               | BSA                                                        | ~1hr          |
| Collagen type II            | PFA              | ~1m         | P         | Hyaluronidase            | -               | 2%                       | RT                     | ~30m            | -                                                          | -             |
|                             | PFA              | ~1m         | P         | Hyaluronidase            | -               | 2%                       | RT                     | ~30m            | Goat Serum                                                 | ~1hr          |
| Collagen type III           | 10% For          | ~1w         | P         | MW                       | Distilled water | -                        | 70-100°C               | ~30m            | -                                                          | -             |
| Collagen type IV            | 10% For          | ~1w         | P         | AU                       | Citric acid BF  | 0.01M                    | 100°C<                 | ~30m            | -                                                          | -             |

Supplementary Table 4-3 Immunological properties of primary antibodies and their respective IHC staining conditions

| Primary antibody                 | Secondary antibody                                                            |          |                     |             |                 |             |                | Supplementary information | Figure No.                   |                 |
|----------------------------------|-------------------------------------------------------------------------------|----------|---------------------|-------------|-----------------|-------------|----------------|---------------------------|------------------------------|-----------------|
| Antibody                         | Secondary antibody information                                                |          | Supplier            | Catalog No. | Incubation time | Temperature | Reagent        |                           |                              | Incubation time |
|                                  | Product                                                                       |          |                     |             |                 |             |                |                           |                              |                 |
| CD68                             | Rabbit Anti-Mouse Immunoglobulins/Biotine - Rabbit F(ab)2 (affinity isolated) |          | Agilent Technology  | E0413       | ~30m            | RT          | DAB            | ~5m                       | -                            |                 |
|                                  | Histofine Simple Stain Rat MAX-PO(M)                                          |          | Nichirei            | 414171      | ~30m            | 37°C        | DAB            | ~10m                      | -                            |                 |
|                                  | Histofine Simple Stain Rat MAX-PO(M)                                          |          | Nichirei            | 414171      | ~30m            | RT          | DAB            | ~10m                      | -                            |                 |
|                                  | VECTASTAIN Elite ABC Kit(mouse IgG)                                           |          | Vector Laboratories | PK-6102     | ~30m            | RT          | DAB            | ~3m                       | -                            |                 |
|                                  | Histofine Simple Stain Rat MAX-PO(M)                                          |          | Nichirei            | 414171      | ~30m            | RT          | DAB            | ~3m                       | -                            |                 |
|                                  | Histofine Simple Stain Rat MAX-PO(M)                                          |          | Nichirei            | 414171      | ~30m            | RT          | DAB            | ~30s                      | AC: 4min (mouse)             |                 |
|                                  | Polyclonal Rabbit Anti-Mouse Immunoglobulins and Streptavidin/HRP             |          | Agilent Technology  | E0464/P0397 | ~30m            | RT          | DAB            | ~1m                       | -                            |                 |
|                                  | VECTASTAIN Elite ABC Kit(mouse IgG)                                           |          | Vector Laboratories | PK-6102     | ~30m            | RT          | DAB            | ~3m                       | -                            |                 |
|                                  | Histofine Simple Stain Rat MAX-PO(MULTI) (Histo Stainer)                      |          | Nichirei            | 714191      | ~30m            | RT          | DAB            | ~10m                      | -                            |                 |
|                                  | Histofine Simple Stain MAX-PO(MULTI)                                          |          | Nichirei            | 414131F     | ~30m            | RT          | DAB            | ~1m                       | -                            |                 |
|                                  | Histofine Simple Stain Rat MAX-PO(M)                                          |          | Nichirei            | 414171      | ~60m            | RT          | DAB            | ~10m                      | -                            |                 |
|                                  | Histofine Simple Stain Rat MAX-PO(M)                                          |          | Nichirei            | 414171      | ~30m            | RT          | DAB            | ~5m                       | -                            |                 |
|                                  | EnVision+/HRP, Mouse                                                          |          | Agilent Technology  | -           | ~60m            | RT          | DAB            | ~5m                       | -                            |                 |
| Histofine Simple Stain MAX-PO(M) |                                                                               | Nichirei | 424131              | ~30m        | RT              | DAB         | ~10m           | -                         |                              |                 |
| CD79α                            | Histofine Simple Stain Rat MAX-PO(MULTI)                                      |          | Nichirei            | 414191F     | ~30m            | RT          | DAB            | ~1m                       | -                            |                 |
| CD117/c-kit                      | VECTASTAIN Elite ABC Kit(rabbit IgG)                                          |          | Vector Laboratories | PK-6101     | ~30m            | RT          | DAB            | ~3m                       | -                            |                 |
|                                  | EnVision+/HRP, Rabbit                                                         |          | Agilent Technology  | -           | ~30m            | RT          | DAB            | ~3m                       | -                            |                 |
|                                  | LSAB Kits, Universal, HRP, Rabbit/Mouse                                       |          | Agilent Technology  | K0675       | ~10m            | RT          | DAB            | ~10s                      | -                            |                 |
|                                  | Histofine Simple Stain MAX-PO(MULTI)                                          |          | Nichirei            | 424154      | ~30m            | 37°C        | DAB            | ~3m                       | -                            |                 |
|                                  | Envision+ / HRP, RUO Rabbit                                                   |          | Agilent Technology  | K4003       | ~30m            | RT          | DAB            | ~1m                       | -                            |                 |
| CD138                            | Biotinylated Anti-Rat IgG (H+L)                                               |          | Vector Laboratories | -           | ~30m            | 37°C        | DAB            | ~3m                       | -                            |                 |
| CD163                            | Histofine Simple Stain Rat MAX-PO(M)                                          |          | Nichirei            | 414171      | ~60m            | RT          | DAB            | ~10m                      | -                            |                 |
|                                  | Histofine Simple Stain MAX-PO(MULTI)                                          |          | Nichirei            | 414131F     | ~30m            | RT          | DAB            | ~1m                       | -                            |                 |
|                                  | Histofine Simple Stain Rat MAX-PO(M)                                          |          | Nichirei            | 414171      | ~30m            | 37°C        | DAB            | ~10m                      | -                            |                 |
|                                  | Histofine Simple Stain Rat MAX-PO(MULTI) (Histo Stainer)                      |          | Nichirei            | 714191      | ~30m            | RT          | DAB            | ~10m                      | -                            |                 |
| Cdc2                             | -                                                                             |          | -                   | -           | -               | -           | No information | -                         |                              |                 |
| e-erb-2                          | Histofine Simple Stain MAX-PO(MULTI)                                          |          | Nichirei            | 424154      | ~30m            | 37°C        | DAB            | ~3m                       | -                            |                 |
|                                  | Envision+ / HRP, RUO Rabbit                                                   |          | Agilent Technology  | K4003       | ~30m            | RT          | DAB            | ~5m                       | -                            |                 |
| Chitinase 3-like 1 (CHI3L1)      | Histofine Simple Stain Mouse MAX-PO(R)                                        |          | Nichirei            | 414341      | ~30m            | RT          | DAB            | ~5m                       | -                            |                 |
| Chromogranin A                   | Histofine Simple Stain Rat MAX-PO(R)                                          |          | Nichirei            | 414181      | ~60m            | RT          | DAB            | ~10m                      | -                            |                 |
|                                  | Histofine Simple Stain MAX-PO(MULTI)                                          |          | Nichirei            | 424154      | ~30m            | 37°C        | DAB            | ~3m                       | -                            |                 |
|                                  | Histofine Simple Stain Rat MAX-PO(MULTI)                                      |          | Nichirei            | 414191F     | ~30m            | RT          | DAB            | ~1m                       | -                            |                 |
| Chx10                            | Anti sheep IgG Rabbit/HRP                                                     |          | Agilent Technology  | P0163       | ~30m            | RT          | DAB            | ~20s                      | -                            |                 |
| Claudin 11                       | Histofine Simple Stain Rat MAX-PO(MULTI)                                      |          | Nichirei            | 414191      | ~30m            | RT          | DAB            | No information            | -                            |                 |
|                                  | Histofine Simple Stain Rat MAX-PO(MULTI)                                      |          | Nichirei            | 414191      | ~30m            | RT          | DAB            | No information            | -                            |                 |
| Clusterin                        | Histofine Simple Stain Rat MAX-PO(G)                                          |          | Nichirei            | 414331      | ~60m            | RT          | DAB            | ~30s                      | -                            |                 |
|                                  | Histofine Simple Stain Rat MAX-PO(G)                                          |          | Nichirei            | 414331      | ~30m            | RT          | DAB            | ~3m                       | -                            |                 |
| Collagen type I                  | Envision+ / HRP, RUO Rabbit                                                   |          | Agilent Technology  | K4003       | ~30m            | RT          | DAB            | ~5m                       | -                            |                 |
|                                  | Polyclonal Goat Anti-Rabbit Immunoglobulins and Streptavidin/HRP              |          | Agilent Technology  | E0432/P0397 | ~30m            | RT          | DAB            | ~5m                       | -                            |                 |
| Collagen type II                 | Histofine Simple Stain Rat MAX-PO(MULTI)                                      |          | Nichirei            | 414191      | ~30m            | RT          | DAB            | ~30s                      | Decalcified with 10% EDTA2Na |                 |
|                                  | EnVision+System / HRP, Mouse(DAB+), RUO                                       |          | Agilent Technology  | K4006       | ~30m            | RT          | DAB            | ~1m                       | Decalcified with K-CX        |                 |
| Collagen type III                | Rabbit Anti-Mouse Immunoglobulins/Biotine - Rabbit F(ab)2 (affinity isolated) |          | Agilent Technology  | E0413       | ~30m            | RT          | DAB            | ~5m                       | -                            |                 |
| Collagen type IV                 | Rabbit Immunoglobulins                                                        |          | Agilent Technology  | E0431       | ~30m            | RT          | DAB            | ~5m                       | -                            |                 |

Supplementary Table 5-1 Immunological properties of primary antibodies and their respective IHC staining conditions

| Primary antibody                   |                 |                                                               |             |                    |             |    |    |    |    |     |     |            |          |            |                 |             |                           |                  |                   |        |   |
|------------------------------------|-----------------|---------------------------------------------------------------|-------------|--------------------|-------------|----|----|----|----|-----|-----|------------|----------|------------|-----------------|-------------|---------------------------|------------------|-------------------|--------|---|
| Antibody                           |                 |                                                               |             | Species reactivity |             |    |    |    |    |     |     |            |          | Dilution   | Incubation time | Temperature | Supplementary information | Positive control | Reactivity        |        |   |
| Antigen                            | Clone           | Supplier                                                      | Catalog No. | Clonality          | Host animal | Rt | Mo | Rb | GP | Pri | Dog | Sw         | Other    |            |                 |             |                           |                  |                   |        |   |
| Cox-2                              | 33              | BD Transduction Laboratories                                  | 610203      | MoAb               | Mo          | -  | ○  | -  | -  | -   | -   | -          | -        | ~×1/50     | O/N             | 4°C         | -                         | Kidney           | ○                 |        |   |
|                                    | -               | Immuno-Biological Laboratories Co., Ltd.                      | 18955       | MoAb               | Mo          | -  | ○  | -  | -  | -   | -   | -          | -        | ~×1/100    | O/N             | 4°C         | -                         | Kidney           | ○                 |        |   |
|                                    | -               | Immuno-Biological Laboratories Co., Ltd.                      | 18955       | PoAb               | Rb          | ○  | -  | -  | -  | -   | -   | -          | -        | ~×1/50     | O/N             | 4°C         | -                         | Kidney           | ○                 |        |   |
|                                    | 33              | BD Transduction Laboratories                                  | 610204      | MoAb               | Mo          | ○  | -  | ○  | -  | -   | ○   | -          | -        | ~×1/200    | ~30m            | RT          | -                         | Kidney           | ○                 |        |   |
| -                                  | Cayman Chemical | 160106                                                        | PoAb        | Mo                 | ○           | -  | -  | -  | -  | -   | -   | -          | ~×1/1000 | ~30m       | RT              | -           | Kidney                    | ○                |                   |        |   |
| CXCR3                              | -               | Bioss Inc                                                     | bs-2209R    | PoAb               | Rb          | ○  | ○  | -  | ○  | -   | -   | -          | -        | ~×1/100    | O/N             | 4°C         | -                         | Lymph node       | ×                 |        |   |
| Cyclin D1                          | DCS6            | Cell Signaling Technology                                     | 2926        | MoAb               | Mo          | ○  | ○  | -  | -  | -   | -   | -          | -        | ~×1/100    | O/N             | 4°C         | -                         | Intestine        | ○                 |        |   |
| Cystatin C                         | -               | Abcam plc                                                     | ab109508    | MoAb               | Rb          | ○  | -  | -  | -  | -   | -   | -          | -        | ~×1/1000   | O/N             | 4°C         | -                         | Kidney           | ○                 |        |   |
| Cytokeratin or Keratin/cytokeratin | AE1/AE3         | Agilent Technology                                            | IR05361-2J  | MoAb               | Mo          | ○  | ○  | -  | -  | -   | -   | -          | -        | Prediluted | O/N             | 4°C         | -                         | Skin             | ○                 |        |   |
|                                    |                 |                                                               |             | MoAb               | Mo          | ○  | -  | ○  | -  | -   | ○   | -          | -        | -          | Prediluted      | ~60m        | RT                        | ~×1/5            | Skin              | ○      |   |
|                                    |                 |                                                               |             | MoAb               | Mo          | ○  | -  | -  | -  | -   | -   | -          | -        | Marmoset   | -               | Prediluted  | ~30m                      | RT               | -                 | Skin   | ○ |
|                                    |                 |                                                               |             | MoAb               | Mo          | -  | -  | -  | -  | -   | -   | ○          | -        | -          | -               | Prediluted  | O/N                       | 4°C              | -                 | Skin   | ○ |
|                                    |                 |                                                               |             | MoAb               | Mo          | ○  | -  | -  | -  | -   | -   | -          | -        | -          | -               | Prediluted  | ~30m                      | RT               | -                 | Kidney | ○ |
|                                    |                 | Nichirei Biosciences                                          | 412811      | MoAb               | Mo          | -  | -  | -  | -  | -   | ○   | -          | -        | -          | -               | Prediluted  | ~60m                      | RT               | -                 | Lung   | ○ |
|                                    |                 |                                                               |             | MoAb               | Mo          | -  | -  | -  | -  | -   | -   | ○          | ○        | -          | -               | Prediluted  | ~60m                      | 37°C             | -                 | Lung   | ○ |
|                                    |                 |                                                               |             | MoAb               | Mo          | ○  | -  | -  | -  | -   | -   | ○          | -        | Zebrafish  | -               | Prediluted  | O/N                       | 4°C              | -                 | Skin   | ○ |
|                                    |                 |                                                               |             | MoAb               | Mo          | -  | ○  | -  | -  | -   | -   | -          | -        | -          | -               | Prediluted  | O/N                       | 4°C              | -                 | Skin   | ○ |
|                                    |                 |                                                               |             | MoAb               | Rb          | ○  | ○  | -  | -  | -   | -   | ○          | -        | -          | -               | Prediluted  | ~60m                      | RT               | -                 | Skin   | ○ |
| MoAb                               | Mo              | ○                                                             | -           | -                  | -           | -  | -  | -  | -  | -   | -   | Prediluted | O/N      | 4°C        | -               | Uterus      | ○                         |                  |                   |        |   |
| Cytokeratin                        | -               | Nichirei Biosciences                                          | 422061      | PoAb               | Rb          | ○  | -  | -  | -  | -   | -   | -          | -        | Prediluted | O/N             | 4°C         | -                         | Skin             | ○                 |        |   |
| Cytokeratin 6                      | -               | Abcam plc                                                     | ab 24646    | PoAb               | Rb          | -  | ○  | -  | -  | -   | -   | -          | -        | ~×1/500    | ~60m            | RT          | -                         | Skin             | ○                 |        |   |
| Cytokeratin 7                      | OV-TL 12/30     | Agilent Technology                                            | M701801-2   | MoAb               | Mo          | -  | ○  | -  | -  | -   | ○   | -          | Cat      | ~×1/25     | ~60m            | RT          | -                         | Intestine        | ○                 |        |   |
|                                    |                 |                                                               |             | MoAb               | Mo          | ○  | -  | -  | -  | -   | ○   | -          | -        | Cat        | ~×1/25          | ~60m        | RT                        | -                | Intestine         | ○      |   |
| Cytokeratin 8                      | Ks8.7           | Progen                                                        | 61038       | MoAb               | Mo          | -  | ○  | -  | -  | -   | -   | -          | -        | ~×1/20     | ~60m            | RT          | -                         | Liver            | ○                 |        |   |
| Cytokeratin 8/18                   | -               | Progen                                                        | GP11        | PoAb               | GP          | -  | ○  | -  | -  | -   | -   | -          | -        | ~×1/100    | ~30m            | RT          | -                         | Other            | ○                 |        |   |
|                                    |                 |                                                               |             | PoAb               | GP          | ○  | ○  | -  | -  | -   | -   | -          | -        | -          | ~×1/1000        | O/N         | 4°C                       | -                | Other             | ○      |   |
| Cytokeratin 10                     | DE-K10          | Abcam plc                                                     | ab 9026     | MoAb               | Mo          | ○  | ○  | -  | -  | -   | -   | -          | -        | ~×1/500    | ~60m            | RT          | -                         | Skin             | ○                 |        |   |
| Cytokeratin 14                     | -               | GeneTex                                                       | GTX104124   | PoAb               | Rb          | ○  | -  | -  | -  | -   | -   | -          | -        | ~×1/500    | O/N             | 4°C         | -                         | Skin             | ○                 |        |   |
| Cytokeratin 18                     | Ks18.04         | Progen                                                        | 61028       | MoAb               | Mo          | -  | ○  | -  | -  | -   | -   | -          | -        | ~×1/100    | ~60m            | RT          | -                         | Other            | ○                 |        |   |
|                                    | C-04            | Abcam plc                                                     | ab 668      | MoAb               | Mo          | ○  | -  | -  | -  | -   | -   | -          | Cat      | ~×1/100    | ~60m            | RT          | -                         | Eye              | ○                 |        |   |
|                                    |                 | Santa Cruz Biotechnology, Inc.                                | SC-51582    | MoAb               | Mo          | ○  | -  | -  | -  | -   | -   | -          | -        | ~×1/100    | ~120m           | RT          | -                         | Mammary          | ○                 |        |   |
| Cytokeratin 19                     | b170            | Leica Biosystems                                              | NCL-CK19    | MoAb               | Mo          | ○  | -  | -  | -  | ○   | -   | ○          | ~×1/200  | ~60m       | RT              | -           | Brain                     | ○                |                   |        |   |
|                                    |                 |                                                               |             | MoAb               | Mo          | -  | ○  | -  | -  | -   | -   | -          | -        | -          | ~×1/150         | ~60m        | RT                        | -                | -                 | ○      |   |
|                                    | -               | Agilent Technology                                            | M088801-2   | MoAb               | Mo          | -  | -  | -  | -  | -   | ○   | -          | -        | ~×1/50     | O/N             | 4°C         | -                         | Skin             | ○                 |        |   |
|                                    | -               | Abcam plc                                                     | ab15463     | PoAb               | Rb          | ○  | ○  | -  | -  | -   | ○   | -          | Cat      | ~×1/100    | ~60m            | RT          | -                         | Liver            | ○                 |        |   |
|                                    |                 |                                                               |             | PoAb               | Rb          | ○  | -  | -  | -  | -   | -   | -          | -        | -          | ~×1/50          | O/N         | RT                        | -                | Forestomach stain | ○      |   |
| BA17                               | R&D Systems     | MAB3506                                                       | MoAb        | Mo                 | ○           | -  | -  | -  | -  | -   | -   | -          | ~×1/500  | ~60m       | RT              | -           | Liver                     | ○                |                   |        |   |
| Desmin                             | D33             | Agilent Technology                                            | IR60661-2J  | MoAb               | Mo          | ○  | -  | -  | -  | ○   | -   | -          | -        | Prediluted | ~60m            | RT          | ~×1/3                     | Muscle           | ○                 |        |   |
|                                    |                 |                                                               |             | MoAb               | Mo          | ○  | -  | -  | -  | -   | -   | -          | -        | -          | Prediluted      | ~60m        | RT                        | -                | Kidney            | ○      |   |
|                                    |                 |                                                               |             | MoAb               | Mo          | -  | -  | -  | -  | -   | ○   | -          | ○        | -          | -               | Prediluted  | O/N                       | 4°C              | -                 | Muscle | ○ |
|                                    |                 |                                                               |             | MoAb               | Mo          | ○  | -  | -  | -  | -   | -   | -          | -        | -          | -               | Prediluted  | ~60m                      | RT               | -                 | Kidney | ○ |
|                                    |                 |                                                               |             | MoAb               | Mo          | ○  | -  | -  | -  | -   | -   | -          | -        | Marmoset   | -               | Prediluted  | ~60m                      | RT               | -                 | Muscle | ○ |
|                                    |                 | Nichirei Biosciences                                          | 413651      | MoAb               | Mo          | ○  | -  | -  | -  | -   | -   | ○          | -        | -          | Prediluted      | ~60m        | 37°C                      | -                | Muscle            | ○      |   |
| Dityrosine (DT)                    | 1C3             | Japan Institute for the Control of Aging, NIKKEN SEIL Co. Ltd | MDT-020P    | MoAb               | Mo          | ○  | ○  | -  | -  | -   | ○   | -          | -        | ~×1/200    | O/N             | 4°C         | -                         | Other            | ○                 |        |   |
| Dog IgG                            | -               | Bethyl Laboratories, Inc.                                     | A40-123P    | PoAb               | Gt          | -  | -  | -  | -  | -   | ○   | -          | -        | ~×1/200    | O/N             | 4°C         | -                         | Lymph node       | ○                 |        |   |

Supplementary Table 5-2 Immunological properties of primary antibodies and their respective IHC staining conditions

| Antibody                           | Primary antibody |             |           |                          |                                      |                          |                        |                 |                                                 |               |
|------------------------------------|------------------|-------------|-----------|--------------------------|--------------------------------------|--------------------------|------------------------|-----------------|-------------------------------------------------|---------------|
|                                    | Fixing solution  | Fixing time | Embedding | Antigen retrieval method | Solution                             | Concentration/pH/reagent | Incubation temperature | Incubation time | Blocking                                        |               |
|                                    |                  |             |           | Method                   |                                      |                          |                        |                 | Blocking solution                               | Blocking time |
| Cox-2                              | 10% For          | ~1w         | P         | PC                       | Citric acid BF                       | 0.01M                    | 100°C<                 | ~5m             | 3% H <sub>2</sub> O <sub>2</sub>                | ~1hr          |
|                                    | 10% For          | ~1w         | P         | PC                       | Citric acid BF                       | 0.01M                    | 100°C<                 | ~5m             | 3% H <sub>2</sub> O <sub>2</sub>                | ~1hr          |
|                                    | 10% For          | ~1w         | P         | AU                       | Citric acid BF                       | -                        | 100°C<                 | ~10m            | -                                               | -             |
|                                    | 10% For          | Unknown     | P         | Not complied             | -                                    | -                        | -                      | -               | -                                               | -             |
| CXCR3                              | 10% For          | Unknown     | P         | MW                       | Dako Target Retrieval Solution, pH 9 | -                        | -                      | ~30m            | -                                               | -             |
| Cyclin D1                          | 10% For          | 1y~         | P         | AU                       | Citric acid BF                       | -                        | 100°C<                 | ~5m             | 4% Block Ace                                    | ~1hr          |
| Cystatin C                         | 10% For          | Unknown     | P         | MW                       | Citric acid BF                       | -                        | Unknown                | ~10m            | Block Ace                                       | ~1hr          |
| Cytokeratin or Keratin/cytokeratin | 10% For          | 1y~         | P         | AU                       | Citric acid BF                       | -                        | 100°C<                 | ~5m             | 4% Block Ace                                    | ~1hr          |
|                                    | 10% For          | ~1d         | P         | MW                       | Citric acid BF                       | 0.01M                    | 70-100°C               | ~30m            | 5% Skim milk in PBS                             | ~1hr          |
|                                    | 10% For          | ~1w         | P         | PC                       | -                                    | -                        | 100°C<                 | ~10m            | Block Ace                                       | ~1hr          |
|                                    | 10% For          | ~1w         | P         | AU                       | Citric acid BF                       | -                        | 100°C<                 | ~30m            | 10% Goat Serum                                  | ~1hr          |
|                                    | 10% For          | ~O/N        | P         | PC                       | Citric acid BF                       | -                        | 70-100°C               | ~10m            | Normal serum                                    | 30min         |
|                                    | 10% For          | ~1w         | P         | AU                       | Citric acid BF                       | -                        | 100°C<                 | ~10m            | 3% H <sub>2</sub> O <sub>2</sub> /Protein Block | ~1hr          |
|                                    | 10% For          | ~1w         | P         | MW                       | Citric acid BF                       | -                        | 100°C<                 | ~30m            | Blocking One                                    | ~1hr          |
|                                    | 10% For          | ~1m         | P         | AU                       | Citric acid BF                       | pH6.0                    | 100°C<                 | ~30m            | Goat Serum                                      | ~1hr          |
|                                    | 10% For          | Unknown     | P         | AU                       | Citric acid BF                       | pH6.0                    | 100°C<                 | ~30m            | Goat Serum                                      | ~1hr          |
|                                    | 10% For          | Unknown     | P         | MW                       | Citric acid BF                       | -                        | -                      | ~30m            | -                                               | -             |
| Cytokeratin                        | 10% For          | ~1w         | P         | Trypsin                  | -                                    | 0.10%                    | 37°C                   | ~10m            | 10% Goat Serum                                  | ~1hr          |
| Cytokeratin 6                      | 10% For          | ~1w         | P         | MW                       | Immunosaver                          | -                        | 100°C<                 | ~5m             | 2% BSA/PBS                                      | ~1hr          |
| Cytokeratin 7                      | 10% For          | ~1w         | P         | Proteinase               | -                                    | 0.04                     | RT                     | ~10m            | Goat Serum                                      | ~1hr          |
|                                    | 10% For          | ~1w         | P         | Proteinase               | -                                    | 0.04                     | RT                     | ~10m            | Goat Serum                                      | ~1hr          |
| Cytokeratin 8                      | 10% For          | ~1m         | P         | AU                       | Citric acid BF                       | pH6.0                    | 100°C<                 | ~10m            | Goat Serum                                      | ~1hr          |
| Cytokeratin 8/18                   | 10% For          | ~1m         | P         | AU                       | Citric acid BF                       | pH6.0                    | 100°C<                 | ~10m            | Block Ace                                       | ~1hr          |
|                                    | 10% For          | Unknown     | P         | MW                       | Citric acid BF                       | -                        | -                      | ~30m            | -                                               | -             |
| Cytokeratin 10                     | 10% For          | ~1w         | P         | MW                       | Immunosaver                          | -                        | 100°C<                 | ~5m             | 2% BSA/PBS                                      | ~1hr          |
| Cytokeratin 14                     | 10% For          | ~1w         | P         | Trypsin                  | -                                    | 0.10%                    | 37°C                   | ~10m            | 10% Goat Serum                                  | ~1hr          |
| Cytokeratin 18                     | 10% For          | ~1m         | P         | AU                       | Citric acid BF                       | pH6.0                    | 100°C<                 | ~10m            | Goat Serum                                      | ~1hr          |
|                                    | 10% For          | ~1w         | P         | MW                       | Citric acid BF                       | pH6.0                    | 100°C<                 | ~10m            | 2% BSA/PBS                                      | ~1hr          |
|                                    | 10% For          | ~6m         | P         | AU                       | Tris BF                              | -                        | 100°C<                 | ~30m            | Dako X0909                                      | ~1hr          |
| Cytokeratin 19                     | 10% For          | ~1d         | P         | Trypsin                  | -                                    | 0.10%                    | 37°C                   | ~30m            | 5% Skim milk in PBS                             | ~1hr          |
|                                    | 10% For          | ~1m         | P         | Trypsin                  | -                                    | -                        | 37°C                   | ~30m            | Goat Serum                                      | ~1hr          |
|                                    | 10% For          | ~1w         | P         | AU                       | Tris BF                              | -                        | 100°C<                 | ~10m            | Blocking One                                    | ~1hr          |
|                                    | 10% For          | ~1w         | P         | PC                       | Citric acid BF                       | -                        | 100°C<                 | ~10m            | Goat Serum                                      | ~1hr          |
|                                    | 10% For          | ~1d         | P         | Boil                     | Citric acid BF                       | -                        | 70-100°C               | ~30m            | No information                                  | -             |
| Desmin                             | 10% For          | ~1w         | P         | Boil                     | Citric acid BF                       | -                        | 70-100°C               | ~30m            | 3% H <sub>2</sub> O <sub>2</sub> /Protein Block | ~1hr          |
|                                    | 10% For          | ~1d         | P         | Not complied             | -                                    | -                        | -                      | -               | 5% Skim milk in PBS                             | ~1hr          |
|                                    | PFA              | ~1d         | P         | AU                       | Citric acid BF                       | -                        | 100°C<                 | ~30m            | 3% H <sub>2</sub> O <sub>2</sub> /Protein Block | ~1hr          |
|                                    | 10% For          | ~1w         | P         | AU                       | Citric acid BF                       | -                        | 100°C<                 | ~30m            | 10% Goat Serum                                  | ~1hr          |
|                                    | 10% For          | ~1d         | P         | AU                       | Citric acid BF                       | -                        | 100°C<                 | ~30m            | 3% H <sub>2</sub> O <sub>2</sub> /Protein Block | ~1hr          |
|                                    | 10% For          | ~1w         | P         | PC                       | Citric acid BF                       | 10mM                     | 100°C<                 | ~10m            | Block Ace                                       | ~1hr          |
| Dityrosine (DT)                    | 10% For          | ~1y         | P         | MW                       | Citric acid BF                       | 0.01mol/L                | 70-100°C               | ~10m            | 0.5% Casein/PBS                                 | ~1hr          |
|                                    | 10% For          | ~1w         | P         | AU                       | Citric acid BF                       | -                        | 100°C<                 | ~10m            | Blocking One                                    | ~1hr          |
| Dog IgG                            | 10% For          | ~1w         | P         | AU                       | Tris BF                              | -                        | 100°C<                 | ~10m            | Blocking One                                    | ~1hr          |

Supplementary Table 5-3 Immunological properties of primary antibodies and their respective IHC staining conditions

| Primary antibody                   | Secondary antibody                                       |  |                     |             |                 |             |         | Supplementary information | Figure No. |                 |
|------------------------------------|----------------------------------------------------------|--|---------------------|-------------|-----------------|-------------|---------|---------------------------|------------|-----------------|
| Antibody                           | Secondary antibody information                           |  | Supplier            | Catalog No. | Incubation time | Temperature | Reagent |                           |            | Incubation time |
|                                    | Product                                                  |  |                     |             |                 |             |         |                           |            |                 |
| Cox-2                              | EnVision+ Dual Link, Single Reagents, HRP                |  | Agilent Technology  | K4063       | ~30m            | RT          | DAB     | ~5m                       | -          |                 |
|                                    | LSAB Kits, Universal, HRP, Rabbit/Mouse                  |  | Agilent Technology  | K0675       | ~30m            | RT          | DAB     | ~5m                       | -          |                 |
|                                    | Histofine Simple Stain Rat MAX-PO(MULTI)                 |  | Nichirei            | 414191      | ~30m            | RT          | DAB     | ~1m                       | 38         |                 |
|                                    | -                                                        |  | -                   | -           | -               | -           | -       | No information            | -          |                 |
| CXCR3                              | Histofine Simple Stain Rat MAX-PO(MULTI)                 |  | Nichirei            | 414191      | ~30m            | RT          | DAB     | ~5m                       | -          |                 |
| Cyclin D1                          | EnVision+/HRP, Mouse                                     |  | Agilent Technology  | -           | ~30m            | 37°C        | DAB     | ~3m                       | -          |                 |
| Cystatin C                         | Histofine Simple Stain Rat MAX-PO(R)                     |  | Nichirei            | 414181      | ~30m            | RT          | DAB     | ~30s                      | -          |                 |
| Cytokeratin or Keratin/cytokeratin | EnVision+/HRP, Mouse                                     |  | Agilent Technology  | -           | ~30m            | 37°C        | DAB     | ~3m                       | -          |                 |
|                                    | Histofine Simple Stain Rat MAX-PO(M)                     |  | Nichirei            | 414171      | ~60m            | RT          | DAB     | ~10m                      | -          |                 |
|                                    | Histofine Simple Stain Rat MAX-PO(MULTI)                 |  | Nichirei            | 414191      | ~30m            | RT          | DAB     | ~10m                      | -          |                 |
|                                    | EnVision+/HRP, Mouse                                     |  | Agilent Technology  | -           | ~30m            | RT          | DAB     | ~3m                       | 39         |                 |
|                                    | VECTASTAIN Elite ABC Kit(mouse IgG)                      |  | Vector Laboratories | PK-6102     | ~30m            | RT          | DAB     | ~1m                       | -          |                 |
|                                    | Envision+ / HRP, RUO Mouse                               |  | Agilent Technology  | K4001       | ~30m            | RT          | DAB     | ~3m                       | -          |                 |
|                                    | Histofine Simple Stain MAX-PO(MULTI)                     |  | Nichirei            | 424154      | ~30m            | 37°C        | DAB     | ~3m                       | -          |                 |
|                                    | Histofine Simple Stain Rat MAX-PO(MULTI)                 |  | Nichirei            | 414191F     | ~30m            | RT          | DAB     | ~1m                       | 40         |                 |
|                                    | Histofine mouse Stain Kit                                |  | Nichirei            | 414321F     | ~30m            | RT          | DAB     | No information            | -          |                 |
|                                    | Histofine Simple Stain Rat MAX-PO(R)                     |  | Nichirei            | 414181      | ~30m            | RT          | DAB     | ~5m                       | -          |                 |
| Cytokeratin                        | Histofine Simple Stain Rat MAX-PO(MULTI)                 |  | Nichirei            | 414191      | ~30m            | RT          | DAB     | ~10m                      | -          |                 |
| Cytokeratin                        | Histofine SAB- PO(R)                                     |  | Nichirei            | 424031      | ~10m            | RT          | DAB     | ~1m                       | 41         |                 |
| Cytokeratin 6                      | Histofine Simple Stain Mouse MAX-PO(G) (Histo Stainer)   |  | Nichirei            | 714341      | ~30m            | RT          | DAB     | ~10m                      | -          |                 |
| Cytokeratin 7                      | Histofine Simple Stain MAX-PO(M)                         |  | Nichirei            | 424131      | ~30m            | RT          | DAB     | ~5m                       | 42         |                 |
|                                    | Histofine Simple Stain Rat MAX-PO(M)                     |  | Nichirei            | 414171      | ~30m            | RT          | DAB     | ~5m                       | -          |                 |
| Cytokeratin 8                      | Histofine Simple Stain Rat MAX-PO(MULTI)                 |  | Nichirei            | 414191F     | ~30m            | RT          | DAB     | ~1m                       | -          |                 |
| Cytokeratin 8/18                   | Histofine Simple Stain Rat MAX-PO(MULTI)                 |  | Nichirei            | 414191F     | ~30m            | RT          | DAB     | ~1m                       | -          |                 |
|                                    | -                                                        |  | Agilent Technology  | -           | ~30m            | RT          | DAB     | ~5m                       | -          |                 |
| Cytokeratin 10                     | Histofine mouse Stain Kit (Histo Stainer)                |  | Nichirei            | 714321      | ~30m            | RT          | DAB     | ~10m                      | -          |                 |
| Cytokeratin 14                     | Histofine SAB- PO(R)                                     |  | Nichirei            | 424031      | ~10m            | RT          | DAB     | ~1m                       | 43         |                 |
| Cytokeratin 18                     | Histofine Simple Stain MAX-PO(MULTI)                     |  | Nichirei            | 414131F     | ~30m            | RT          | DAB     | ~1m                       | -          |                 |
|                                    | Histofine Simple Stain Rat MAX-PO(MULTI) (Histo Stainer) |  | Nichirei            | 714191      | ~30m            | RT          | DAB     | ~10m                      | -          |                 |
|                                    | EnVision+ Dual Link, Single Reagents, HRP                |  | Agilent Technology  | K4063       | ~10m            | RT          | DAB     | ~3m                       | 44         |                 |
| Cytokeratin 19                     | Histofine Simple Stain Rat MAX-PO(M)                     |  | Nichirei            | 414171      | ~60m            | RT          | DAB     | ~10m                      | 45         |                 |
|                                    | Histofine Simple Stain MAX-PO(MULTI)                     |  | Nichirei            | 414131F     | ~30m            | RT          | DAB     | ~1m                       | -          |                 |
|                                    | Histofine Simple Stain MAX-PO(MULTI)                     |  | Nichirei            | 424154      | ~30m            | 37°C        | DAB     | ~3m                       | 46         |                 |
|                                    | Histofine Simple Stain Rat MAX-PO(R)                     |  | Nichirei            | 414181      | ~30m            | RT          | DAB     | ~5m                       | 47         |                 |
|                                    | Histofine Simple Stain Rat MAX-PO(MULTI)                 |  | Nichirei            | 414191      | ~30m            | RT          | DAB     | ~10m                      | -          |                 |
| Desmin                             | Histofine Simple Stain Rat MAX-PO(M)                     |  | Nichirei            | 414171      | ~30m            | RT          | DAB     | ~1m                       | -          |                 |
|                                    | Histofine Simple Stain Rat MAX-PO(M)                     |  | Nichirei            | 414171      | ~60m            | RT          | DAB     | ~10m                      | -          |                 |
|                                    | EnVision+/HRP, Mouse                                     |  | Agilent Technology  | -           | ~30m            | RT          | DAB     | ~3m                       | 48         |                 |
|                                    | Histofine Simple Stain Rat MAX-PO(M)                     |  | Nichirei            | 414171      | ~30m            | RT          | DAB     | ~10m                      | -          |                 |
|                                    | Histofine Simple Stain Rat MAX-PO(MULTI)                 |  | Nichirei            | 414191      | ~30m            | RT          | DAB     | ~10m                      | -          |                 |
|                                    | Histofine Simple Stain Rat MAX-PO(MULTI)                 |  | Nichirei            | 414191      | ~30m            | RT          | DAB     | ~20m                      | -          |                 |
| Dityrosine (DT)                    | Histofine Simple Stain Rat MAX-PO(M)                     |  | Nichirei            | 414171      | -               | -           | -       | No information            | -          |                 |
| Dog IgG                            | Histofine Simple Stain MAX-PO(G)                         |  | Nichirei            | 414162      | ~30m            | 37°C        | DAB     | ~3m                       | -          |                 |

Supplementary Table 6-1 Immunological properties of primary antibodies and their respective IHC staining conditions

| Primary antibody                         |               |                                          |                           |           |             |                    |    |    |    |     |     |    |          |            |                 |              |                           |                  |             |   |
|------------------------------------------|---------------|------------------------------------------|---------------------------|-----------|-------------|--------------------|----|----|----|-----|-----|----|----------|------------|-----------------|--------------|---------------------------|------------------|-------------|---|
| Antibody                                 |               |                                          |                           |           |             | Species reactivity |    |    |    |     |     |    |          | Dilution   | Incubation time | Temperature  | Supplementary information | Positive control | Reactivity  |   |
| Antigen                                  | Clone         | Supplier                                 | Catalog No.               | Clonality | Host animal | Rt                 | Mo | Rb | GP | Pri | Dog | Sw | Other    |            |                 |              |                           |                  |             |   |
| Dog IgM                                  | -             | Bethyl Laboratories, Inc.                | A40116A                   | PoAb      | Gt          | -                  | -  | -  | -  | -   | ○   | -  | -        | ~×1/200    | O/N             | 4°C          | -                         | Lymph node       | ○           |   |
| E.coli                                   | -             | USBiological                             | 314192                    | PoAb      | Rb          | -                  | ○  | -  | -  | -   | -   | -  | -        | ~×1/500    | ~60m            | RT           | -                         | Other            | ○           |   |
| E-cadherin                               | 36/E-Cadherin | BD Transduction Laboratories             | 610181                    | MoAb      | Mo          | ○                  | -  | -  | -  | -   | ○   | -  | -        | ~×1/500    | ~60m            | RT           | -                         | Skin             | ○           |   |
|                                          | -             | Santa Cruz Biotechnology, Inc.           | sc-7870                   | PoAb      | Rb          | ○                  | -  | -  | -  | -   | -   | -  | -        | ~×1/50     | ~60m            | 37°C         | -                         | Eye              | ○           |   |
| Estrogen receptor α (ERα)                | -             | Santa Cruz Biotechnology, Inc.           | SC-543                    | PoAb      | Rb          | ○                  | -  | -  | -  | -   | -   | -  | -        | ~×1/200    | ~30m            | RT           | -                         | Mammary          | ○           |   |
|                                          | 6F11          | Thermo Fisher                            | MA5-13304                 | MoAb      | Mo          | ○                  | -  | -  | -  | -   | -   | -  | -        | ~×1/100    | O/N             | 4°C          | -                         | Pituitary        | ○           |   |
| Endothelin-1 (ET-1)                      | -             | Immuno-Biological Laboratories Co., Ltd. | 18201                     | PoAb      | Rb          | -                  | -  | -  | -  | -   | ○   | -  | -        | ~×1/25     | O/N             | 4°C          | -                         | Vessel           | ○           |   |
| Endothelin-A (ET-A)                      | A-405         | Immuno-Biological Laboratories Co., Ltd. | 16201                     | PoAb      | Rb          | -                  | -  | -  | -  | -   | ○   | -  | -        | ~×1/25     | O/N             | 4°C          | -                         | Vessel           | ○           |   |
| Endothelin-B (ET-B)                      | 8Z11          | Immuno-Biological Laboratories Co., Ltd. | 10253                     | MoAb      | Mo          | -                  | -  | -  | -  | -   | ○   | -  | -        | ~×1/50     | O/N             | 4°C          | -                         | Vessel           | ○           |   |
| F4/80                                    | Cl:A3-1       | Abcam plc                                | ab6640                    | MoAb      | Rt          | -                  | ○  | -  | -  | -   | -   | -  | -        | ~×1/500    | ~60m            | RT           | -                         | Spleen           | ○           |   |
|                                          | BM8           | eBioscience(Thermo Fisher Scientific)    | 14-4801-82                | MoAb      | Rt          | ○                  | ○  | -  | -  | -   | -   | -  | -        | ~×1/100    | O/N             | 4°C          | -                         | Spleen           | ○           |   |
| Fas                                      | -             | Abnova                                   | PAB8028                   | PoAb      | Rb          | ○                  | -  | -  | -  | -   | -   | -  | -        | ~×1/500    | O/N             | 4°C          | -                         | Testis           | ○           |   |
| Fascin                                   | EP5902        | Abcam plc                                | ab126772                  | MoAb      | Rb          | ○                  | -  | -  | -  | -   | -   | -  | -        | ~×1/1000   | O/N             | 4°C          | -                         | Spleen           | ○           |   |
| Fibrinogen                               | -             | Agilent Technology                       | A008002-2                 | PoAb      | Rb          | ○                  | -  | -  | -  | -   | -   | -  | -        | ~×1/200    | O/N             | 4°C          | -                         | Other            | ○           |   |
| FosB                                     | -             | Santa Cruz Biotechnology, Inc.           | sc-7203                   | PoAb      | Rb          | -                  | -  | -  | -  | ○   | -   | -  | -        | ~×1/100    | O/N             | 4°C          | -                         | Brain            | ○           |   |
| Foxp3                                    | FJK-16s       | eBioscience(Thermo Fisher Scientific)    | 14-5773                   | MoAb      | Rt          | ○                  | ○  | -  | -  | -   | ○   | -  | -        | ~×1/100    | O/N             | 4°C          | -                         | Lymph node       | ○           |   |
| FSH                                      | -             | Bio-Rad Laboratories, Inc.               | 4561-6959                 | PoAb      | Rb          | ○                  | -  | -  | -  | -   | -   | -  | -        | ~×1/1000   | O/N             | 4°C          | -                         | Pituitary        | ○           |   |
| Galectin-1                               | -             | R&D Systems                              | AF1245                    | PoAb      | Gt          | -                  | ○  | -  | -  | -   | -   | -  | -        | ~×1/50     | O/N             | 4°C          | -                         | Spinal cord      | ○           |   |
| Glial Fibrillary Acidic Protein (GFAP)   | -             | Agilent Technology                       | IR52461-2J                | PoAb      | Rb          | ○                  | -  | -  | -  | -   | ○   | -  | -        | Prediluted | ~60m            | RT           | ~×1/5                     | Brain            | ○           |   |
|                                          | -             |                                          | IS52430-2J                | PoAb      | Rb          | -                  | -  | -  | -  | -   | ○   | -  | -        | -          | Prediluted      | O/N          | 4°C                       | -                | Brain       | ○ |
|                                          | -             |                                          | IR52461-2J/IS52430-2J     | PoAb      | Rb          | ○                  | -  | -  | -  | -   | -   | -  | -        | Marmoset   | Prediluted      | ~30m         | RT                        | -                | Brain       | ○ |
|                                          | -             |                                          | IS52430-2J                | PoAb      | Rb          | -                  | ○  | -  | -  | -   | -   | -  | -        | -          | Prediluted      | ~30m         | RT                        | -                | Brain       | ○ |
|                                          | 6F2           | Nichirei Biosciences                     | M076101-2                 | MoAb      | Mo          | ○                  | -  | -  | -  | ○   | -   | -  | -        | ~×1/100    | ~60m            | RT           | -                         | Eye              | ○           |   |
|                                          | GA5           |                                          | 422261                    | MoAb      | Mo          | ○                  | -  | -  | -  | -   | -   | -  | -        | -          | Prediluted      | O/N          | 4°C                       | -                | Spinal cord | ○ |
|                                          | GA5           |                                          | Cell Signaling Technology | 3670      | MoAb        | Mo                 | ○  | -  | -  | -   | -   | ○  | -        | -          | ~×1/1000        | ~60m         | RT                        | -                | Brain       | ○ |
| Growth Hormone                           | 222540        | R&D Systems                              | MAB1566                   | MoAb      | Mo          | ○                  | -  | -  | -  | -   | -   | -  | -        | ~×1/1000   | O/N             | 4°C          | -                         | Pituitary        | ○           |   |
|                                          | -             |                                          |                           | PoAb      | Gt          | ○                  | -  | -  | -  | -   | -   | -  | -        | -          | ~×1/100         | ~60m         | RT                        | -                | Kidney      | ○ |
| α2u-globulin                             | -             | R&D Systems                              | AF 586                    | PoAb      | Gt          | ○                  | -  | -  | -  | -   | -   | -  | -        | ~×1/500    | ~60m            | 37°C         | -                         | Kidney           | ○           |   |
|                                          | -             |                                          |                           | PoAb      | Gt          | ○                  | -  | -  | -  | -   | -   | -  | -        | -          | ~×1/200-300     | ~120m or O/N | RT or 4°C                 | -                | Kidney      | ○ |
|                                          | -             |                                          |                           | PoAb      | Gt          | ○                  | -  | -  | -  | -   | -   | -  | -        | -          | ~×1/1000        | O/N          | 4°C                       | -                | Other       | ○ |
|                                          | -             |                                          |                           | PoAb      | Gt          | ○                  | -  | -  | -  | -   | -   | -  | -        | -          | ~×1/100         | O/N          | 4°C                       | -                | Kidney      | ○ |
|                                          | -             |                                          |                           | MoAb      | Mo          | ○                  | -  | -  | -  | -   | -   | -  | -        | -          | ~×1/100         | O/N          | 4°C                       | -                | Kidney      | ○ |
| α2u-globulin (Biotinylated)              | 129736        | R&D Systems                              | BAM586                    | MoAb      | Mo          | ○                  | -  | -  | -  | -   | -   | -  | ~×1/100  | O/N        | 4°C             | -            | Kidney                    | ○                |             |   |
| Glucagon                                 | K79bB10       | Abcam plc                                | ab10988                   | MoAb      | Mo          | ○                  | -  | -  | -  | -   | -   | -  | ~×1/4000 | O/N        | 4°C             | -            | Pancreas                  | ○                |             |   |
| Glucose transporter 1 (GLUT1)            | -             | Abcam plc                                | ab14683                   | PoAb      | Rb          | ○                  | -  | -  | -  | -   | -   | -  | ~×1/200  | O/N        | 4°C             | -            | Placenta                  | ○                |             |   |
| Glutamine Synthetase                     | GS-6          | Merck                                    | MAB302                    | MoAb      | Mo          | ○                  | -  | -  | -  | -   | -   | -  | ~×1/200  | O/N        | 4°C             | -            | Eye                       | ○                |             |   |
| Glutathione S-transferase Placental type | -             | MBL International                        | 311                       | PoAb      | Rb          | ○                  | -  | -  | -  | -   | -   | -  | -        | ~×1/1000   | ~60m            | RT           | -                         | Liver            | ○           |   |
|                                          | -             |                                          |                           | PoAb      | Rb          | ○                  | -  | -  | -  | -   | -   | -  | -        | -          | ~×1/1000        | ~60m         | RT                        | -                | Liver       | ○ |
|                                          | -             |                                          |                           | PoAb      | Rb          | ○                  | -  | -  | -  | -   | -   | -  | -        | -          | ~×1/1000        | O/N          | 4°C                       | -                | Liver       | ○ |
|                                          | -             |                                          |                           | PoAb      | Rb          | -                  | ○  | -  | -  | -   | -   | -  | -        | -          | ~×1/1000        | ~60m         | RT                        | -                | Liver       | ○ |
|                                          | -             |                                          |                           | PoAb      | Rb          | ○                  | -  | -  | -  | -   | -   | -  | -        | -          | ~×1/200         | ~30m         | RT                        | -                | Liver       | ○ |
|                                          | -             |                                          |                           | PoAb      | Rb          | ○                  | ○  | -  | -  | -   | -   | -  | -        | -          | ~×1/1000        | O/N          | 4°C                       | -                | Liver       | ○ |
|                                          | -             |                                          |                           | PoAb      | Rb          | ○                  | -  | -  | -  | -   | -   | -  | -        | -          | ~×1/1000        | ~60m         | RT                        | -                | Liver       | ○ |
|                                          | -             |                                          |                           | PoAb      | Rb          | ○                  | -  | -  | -  | -   | -   | -  | -        | -          | ~×1/1000        | ~60m         | RT                        | -                | Liver       | ○ |
|                                          | -             |                                          |                           | PoAb      | Rb          | ○                  | -  | -  | -  | -   | -   | -  | -        | -          | ~×1/1000        | O/N          | 4°C                       | -                | Other       | ○ |
| Hemoglobin                               | -             | MP Biomedicals                           | 55447                     | PoAb      | Rb          | -                  | ○  | -  | -  | -   | -   | -  | ~×1/1000 | O/N        | 4°C             | -            | Other                     | ○                |             |   |



Supplementary Table 6-2 Immunological properties of primary antibodies and their respective IHC staining conditions

| Antibody                                 | Primary antibody |             |              |                          |   |                    |                          |                        |                 |                                                 |               |
|------------------------------------------|------------------|-------------|--------------|--------------------------|---|--------------------|--------------------------|------------------------|-----------------|-------------------------------------------------|---------------|
|                                          | Fixing solution  | Fixing time | Embedding    | Antigen retrieval method |   | Solution           | Concentration/pH/reagent | Incubation temperature | Incubation time | Blocking                                        |               |
|                                          |                  |             |              | Method                   |   |                    |                          |                        |                 | Blocking solution                               | Blocking time |
| Dog IgM                                  | 10% For          | ~1w         | P            | AU                       |   | Citric acid BF     | -                        | 100°C<                 | ~10m            | Blocking One                                    | ~1hr          |
| E.coli                                   | 10% For          | ~1w         | P            | MW                       |   | Citric acid BF     | -                        | 100°C<                 | ~30m            | 2.5% Normal serum                               | ~1hr          |
| E-cadherin                               | 10% For          | ~1d         | P            | MW                       |   | EDTA               | 1mM                      | 70-100°C               | ~30m            | 5% Skim milk in PBS                             | ~1hr          |
|                                          | PFA              | ~1d         | P            | AU                       |   | Citric acid BF     | -                        | 100°C<                 | ~30m            | 3% H <sub>2</sub> O <sub>2</sub> /Protein Block | ~1hr          |
| Estrogen receptor α (ERα)                | 10% For          | ~6m         | P            | AU                       |   | Tris BF            | -                        | 100°C<                 | ~30m            | Dako X0909                                      | ~1hr          |
|                                          | 10% For          | Unknown     | P            | MW                       |   | Citric acid BF     | -                        | -                      | ~30m            | -                                               | -             |
| Endothelin-1 (ET-1)                      | 10% For          | ~1w         | P            | AU                       |   | Citric acid BF     | -                        | 100°C<                 | ~10m            | Blocking One                                    | ~1hr          |
| Endothelin-A (ET-A)                      | 10% For          | ~1w         | P            | AU                       |   | Citric acid BF     | -                        | 100°C<                 | ~10m            | Blocking One                                    | ~1hr          |
| Endothelin-B (ET-B)                      | 10% For          | ~1w         | P            | AU                       |   | Citric acid BF     | -                        | 100°C<                 | ~10m            | Blocking One                                    | ~1hr          |
| F4/80                                    | 10% For          | ~1w         | P            | Boil                     |   | Agilent S1699      | -                        | 70-100°C               | ~30m            | -                                               | -             |
|                                          | 10% For          | Unknown     | P            | Proteinase               |   | -                  | -                        | RT                     | ~10m            | Block Ace                                       | ~1hr          |
| Fas                                      | DA               | Unknown     | P            | Not complied             |   | -                  | -                        | -                      | -               | -                                               | -             |
| Fascin                                   | 10% For          | ~1w         | P            | PC                       |   | Citric acid BF     | -                        | 100°C<                 | ~10m            | Goat Serum                                      | ~1hr          |
| Fibrinogen                               | 10% For          | Unknown     | P            | Proteinase               |   | -                  | -                        | RT                     | ~5m             | Block Ace                                       | ~1hr          |
| FosB                                     | PFA              | ~2d         | F            | Not complied             |   | -                  | -                        | -                      | -               | Block Ace                                       | ~1hr          |
| Foxp3                                    | 10% For          | Unknown     | P            | MW                       |   | HistoVT One        | -                        | -                      | ~30m            | -                                               | -             |
| FSH                                      | 10% For          | ~1w         | P            | Trypsin                  |   | Not complied       | -                        | 37°C                   | ~30m            | No information                                  | -             |
| Galactin-1                               | PFA              | ~O/N        | F            | Not complied             |   | -                  | -                        | -                      | -               | No information                                  | -             |
| Glial Fibrillary Acidic Protein (GFAP)   | 10% For          | ~1d         | P            | Proteinase               |   | -                  | 100µg/ml                 | RT                     | ~10m            | 5% Skim milk in PBS                             | ~1hr          |
|                                          | 10% For          | ~1w         | P            | AU                       |   | Tris BF            | -                        | 100°C<                 | ~10m            | Blocking One                                    | ~1hr          |
|                                          | 10% For          | ~1w         | P            | Not complied             |   | -                  | -                        | -                      | -               | Block Ace                                       | ~1hr          |
|                                          | 10% For          | ~1w         | P            | Not complied             |   | -                  | -                        | -                      | -               | Block Ace                                       | ~1hr          |
|                                          | 10% For          | ~1w         | P            | MW                       |   | Citric acid BF     | pH6.0                    | 100°C<                 | ~10m            | 2% BSA/PBS                                      | ~1hr          |
|                                          | 10% For          | ~4hr        | P            | Not complied             |   | -                  | -                        | -                      | -               | Swine serum(x500)                               | ~1hr          |
|                                          | 10% For          | ~1d         | P            | MW                       |   | Citric acid BF     | 0.01M                    | 70-100°C               | ~30m            | 5% Skim milk in PBS                             | ~1hr          |
| Growth Hormone                           | 10% For          | ~1w         | P            | Trypsin                  |   | Not complied       | -                        | 37°C                   | ~30m            | No information                                  | -             |
|                                          | 10% For          | ~1w         | P            | Not complied             |   | -                  | -                        | -                      | -               | 2% BSA/PBS                                      | ~1hr          |
| α2u-globulin                             | 10% For          | ~1w         | P            | Proteinase / Boil        |   | - / Citric acid BF | -                        | 37°C / 70-100°C        | ~30m / ~30m     | No information                                  | -             |
|                                          | 10% For          | ~1m         | P            | MW                       |   | Citric acid BF     | -                        | 70-100°C               | ~30m            | -                                               | -             |
|                                          | 10% For          | ~1m         | P            | AU                       |   | -                  | -                        | 100°C<                 | ~10m            | Block Ace                                       | ~1hr          |
|                                          | 10% For          | 1y~         | P            | MW                       |   | Citric acid BF     | -                        | 70-100°C               | ~10m            | 4% Block Ace                                    | ~1hr          |
| α2u-globulin (Biotinylated)              | 10% For          | ~1w         | P            | Trypsin                  |   | Not complied       | -                        | 37°C                   | ~30m            | Protein block serum                             | ~1hr          |
| Glucagon                                 | 10% For          | ~1m         | P            | AU                       |   | Citric acid BF     | pH6.0                    | 100°C<                 | ~30m            | Goat Serum                                      | ~1hr          |
| Glucose transporter 1 (GLUT1)            | 10% For          | ~O/N        | P            | PC                       |   | Citric acid BF     | -                        | 70-100°C               | ~10m            | VECTASTAIN Elite ABC Kit(rabbit)                | 30min         |
| Glutamine Synthetase                     | DA               | Unknown     | P            | Proteinase               |   | -                  | -                        | RT                     | ~10m            | Block Ace                                       | ~1hr          |
| Glutathione S-transferase Placental type | 10% For          | ~1w         | P            | Not complied             |   | -                  | -                        | -                      | -               | Dako X0909                                      | ~1hr          |
|                                          | 10% For          | ~1w         | P            | Not complied             |   | -                  | -                        | -                      | -               | Dako X0909                                      | ~1hr          |
|                                          | 10% For          | 1y~         | P            | AU                       |   | Citric acid BF     | -                        | 100°C<                 | ~5m             | 4% Block Ace                                    | ~1hr          |
|                                          | 10% For          | ~1w         | P            | Not complied             |   | -                  | -                        | -                      | -               | Swine serum(x500)                               | ~1hr          |
|                                          | 10% For          | ~1y         | P            | Not complied             |   | -                  | -                        | -                      | -               | -                                               | -             |
|                                          | 10% For          | Unknown     | P            | Not complied             |   | -                  | -                        | -                      | -               | -                                               | -             |
|                                          | 10% For          | ~1d         | P            | Not complied             |   | -                  | -                        | -                      | -               | No information                                  | -             |
| 10% For                                  | Unknown          | P           | Not complied |                          | - | -                  | -                        | -                      | Block Ace       | ~1hr                                            |               |
| Hemoglobin                               | 10% For          | ~1m         | P            | AU                       |   | Citric acid BF     | pH6.0                    | 100°C<                 | ~30m            | Goat Serum                                      | ~1hr          |

Supplementary Table 6-3 Immunological properties of primary antibodies and their respective IHC staining conditions

| Primary antibody                          | Secondary antibody                                               |  |                          |             |                 |             |                                                        | Supplementary information | Figure No. |                 |
|-------------------------------------------|------------------------------------------------------------------|--|--------------------------|-------------|-----------------|-------------|--------------------------------------------------------|---------------------------|------------|-----------------|
| Antibody                                  | Secondary antibody information                                   |  | Supplier                 | Catalog No. | Incubation time | Temperature | Reagent                                                |                           |            | Incubation time |
|                                           | Product                                                          |  |                          |             |                 |             |                                                        |                           |            |                 |
| Dog IgM                                   | Histofine Simple Stain MAX-PO(G)                                 |  | Nichirei                 | 414162      | ~30m            | 37°C        | DAB                                                    | ~3m                       | -          |                 |
| E.coli                                    | Universal elite ABC kit, Positive tissue: E.coli infected tissue |  | Vector Laboratories      | PK-7200     | ~30m            | RT          | DAB                                                    | ~3m                       | -          |                 |
| E-cadherin                                | Histofine Simple Stain Rat MAX-PO(M)                             |  | Nichirei                 | 414171      | ~60m            | RT          | DAB                                                    | ~10m                      | 49         |                 |
|                                           | Envision+ / HRP, RUO Mouse                                       |  | Agilent Technology       | K4001       | ~30m            | RT          | DAB                                                    | ~20m                      | -          |                 |
| Estrogen receptor $\alpha$ (ER $\alpha$ ) | Histofine Simple Stain Rat MAX-PO(R)                             |  | Nichirei                 | 414181      | ~10m            | RT          | DAB                                                    | ~1m                       | 50         |                 |
|                                           | -                                                                |  | -                        | -           | -               | -           | -                                                      | No information            | -          |                 |
| Endothelin-1 (ET-1)                       | Histofine Simple Stain MAX-PO(MULTI)                             |  | Nichirei                 | 424154      | ~30m            | 37°C        | DAB                                                    | ~3m                       | 51         |                 |
| Endothelin-A (ET-A)                       | Histofine Simple Stain MAX-PO(MULTI)                             |  | Nichirei                 | 424154      | ~30m            | 37°C        | DAB                                                    | ~3m                       | 52         |                 |
| Endothelin-B (ET-B)                       | Histofine Simple Stain MAX-PO(MULTI)                             |  | Nichirei                 | 424154      | ~30m            | 37°C        | DAB                                                    | ~3m                       | 53         |                 |
| F4/80                                     | Histofine Simple Stain MAX-PO(Rat) (Histo Stainer)               |  | Nichirei                 | 714311      | ~30m            | RT          | DAB                                                    | ~10m                      | -          |                 |
|                                           | Histofine Simple Stain Mouse MAX-PO(Rat)                         |  | Nichirei                 | 414311      | ~30m            | RT          | DAB                                                    | ~10m                      | -          |                 |
| Fas                                       | Histofine Simple Stain Rat MAX-PO(R)                             |  | Nichirei                 | 414181      | -               | -           | -                                                      | No information            | -          |                 |
| Fascin                                    | Histofine Simple Stain Rat MAX-PO(R)                             |  | Nichirei                 | 414181      | ~30m            | RT          | DAB                                                    | ~5m                       | 54         |                 |
| Fibrinogen                                | Histofine Simple Stain Rat MAX-PO(R)                             |  | Nichirei                 | 414181      | ~30m            | RT          | DAB                                                    | No information            | -          |                 |
| FosB                                      | Histofine Simple Stain MAX-PO(MULTI)                             |  | Nichirei                 | 424152      | ~30m            | RT          | DAB                                                    | ~20m                      | 55         |                 |
| Foxp3                                     | Histofine Simple Stain Rat MAX-PO(MULTI)                         |  | Nichirei                 | 414191      | -               | -           | -                                                      | No information            | -          |                 |
| FSH                                       | Envision+ / HRP, RUO Rabbit                                      |  | Agilent Technology       | K4002       | ~30m            | RT          | DAB                                                    | ~5m                       | 56         |                 |
| Galectin-1                                | Alexa Fluor 488                                                  |  | Thermo Fisher Scientific | A-11055     | ~30m            | RT          | FITC                                                   | No information            | -          |                 |
| Glial Fibrillary Acidic Protein (GFAP)    | Histofine Simple Stain Rat MAX-PO(R)                             |  | Nichirei                 | 414181      | ~60m            | RT          | DAB                                                    | ~10m                      | 57         |                 |
|                                           | Histofine Simple Stain MAX-PO(MULTI)                             |  | Nichirei                 | 424154      | ~30m            | 37°C        | DAB                                                    | ~3m                       | -          |                 |
|                                           | Histofine Simple Stain Rat MAX-PO(MULTI)                         |  | Nichirei                 | 414191      | ~30m            | RT          | DAB                                                    | ~5m                       | -          |                 |
|                                           | Histofine Simple Stain Mouse MAX-PO(R)                           |  | Nichirei                 | 414341      | ~30m            | RT          | DAB                                                    | ~5m                       | -          |                 |
|                                           | Histofine Simple Stain Rat MAX-PO(MULTI) (Histo Stainer)         |  | Nichirei                 | 714191      | ~30m            | RT          | DAB                                                    | ~10m                      | -          |                 |
|                                           | Histofine Simple Stain Rat MAX-PO(M)                             |  | Nichirei                 | 414171      | ~30m            | 37°C        | DAB                                                    | ~10m                      | 58         |                 |
|                                           | Histofine Simple Stain Rat MAX-PO(M)                             |  | Nichirei                 | 414171      | ~60m            | RT          | DAB                                                    | ~10m                      | 59         |                 |
|                                           | Fluorophore labeled immunoglobulin                               |  | Thermo Fisher Scientific | A-11017     | ~30m            | RT          | DAPI (H-1200, VECTOR)<br>(VECTASHIELD Mounting Medium) | Unknown                   | -          |                 |
| Growth Hormone                            | Envision+ / HRP, RUO Mouse                                       |  | Agilent Technology       | K4001       | ~30m            | RT          | DAB                                                    | ~5m                       | 60         |                 |
| $\alpha$ 2u-globulin                      | Histofine Simple Stain Rat MAX-PO(G)                             |  | Nichirei                 | 414331      | ~30m            | RT          | DAB                                                    | ~10m                      | -          |                 |
|                                           | Histofine Simple Stain Rat MAX-PO(G)                             |  | Nichirei                 | 414331      | ~30m            | RT          | DAB                                                    | ~10m                      | -          |                 |
|                                           | Histofine Simple Stain Rat MAX-PO(G) (Histo Stainer)             |  | Nichirei                 | 714331      | ~30m            | RT          | DAB                                                    | ~5m                       | -          |                 |
|                                           | Histofine Simple Stain Rat MAX-PO(G)                             |  | Nichirei                 | 414331F     | ~30m            | RT          | DAB                                                    | ~1m                       | -          |                 |
|                                           | Biotinylated Anti-Goat Immunoglobulins                           |  | -                        | -           | ~30m            | 37°C        | DAB                                                    | ~3m                       | 61         |                 |
| $\alpha$ 2u-globulin (Biotinylated)       | Envision+ / HRP, RUO Mouse                                       |  | Agilent Technology       | K4001       | ~30m            | RT          | DAB                                                    | ~3m                       | 62         |                 |
| Glucagon                                  | Histofine Simple Stain Rat MAX-PO(MULTI)                         |  | Nichirei                 | 414191F     | ~30m            | RT          | DAB                                                    | ~1m                       | 63         |                 |
| Glucose transporter 1 (GLUT1)             | VECTASTAIN Elite ABC Kit(rabbit IgG)                             |  | Vector Laboratories      | PK-6101     | ~30m            | RT          | DAB                                                    | ~1m                       | -          |                 |
| Glutamine Synthetase                      | Histofine Simple Stain Rat MAX-PO(MULTI)                         |  | Nichirei                 | 414191      | ~30m            | RT          | DAB                                                    | ~3m                       | -          |                 |
| Glutathione S-transferase Placental type  | EnVision+ Dual Link, Single Reagents, HRP                        |  | Agilent Technology       | K4063       | ~10m            | RT          | DAB                                                    | ~3m                       | -          |                 |
|                                           | LSAB2 Kits, Universal, HRP, Rabbit/Mouse. For use on rat tissue  |  | Agilent Technology       | K0609       | ~10m            | RT          | NF(New Fuchsin Substrate System)                       | ~10m                      | -          |                 |
|                                           | EnVision+/HRP, Rabbit                                            |  | Agilent Technology       | -           | ~30m            | 37°C        | DAB                                                    | ~3m                       | -          |                 |
|                                           | Rabbit Immunoglobulins                                           |  | Agilent Technology       | E0431       | ~30m            | RT          | DAB                                                    | ~5m                       | -          |                 |
|                                           | Histofine Simple Stain Rat MAX-PO(MULTI)                         |  | Nichirei                 | 414191      | ~30m            | RT          | DAB                                                    | ~5m                       | 64         |                 |
|                                           | Histofine Simple Stain Rat MAX-PO(MULTI)                         |  | Nichirei                 | 414191      | ~30m            | RT          | DAB                                                    | ~3m                       | -          |                 |
|                                           | LSAB2 Kits, Universal, HRP, Rabbit/Mouse. For use on rat tissue  |  | Agilent Technology       | K0609       | ~30m            | RT          | DAB                                                    | ~1m                       | 65         |                 |
| Hemoglobin                                | Histofine Simple Stain Rat MAX-PO(R)                             |  | Nichirei                 | 414181      | ~30m            | RT          | DAB                                                    | No information            | -          |                 |
|                                           | Histofine Simple Stain MAX-PO(R)                                 |  | Nichirei                 | 414141F     | ~30m            | RT          | DAB                                                    | ~1m                       | -          |                 |

Supplementary Table 7-1 Immunological properties of primary antibodies and their respective IHC staining conditions

| Primary antibody              |         |                                                               |              |           |                    |    |    |    |    |     |     |          |       |            |                 |             |                           |                         |            |             |            |   |
|-------------------------------|---------|---------------------------------------------------------------|--------------|-----------|--------------------|----|----|----|----|-----|-----|----------|-------|------------|-----------------|-------------|---------------------------|-------------------------|------------|-------------|------------|---|
| Antibody                      |         |                                                               |              |           | Species reactivity |    |    |    |    |     |     |          |       | Dilution   | Incubation time | Temperature | Supplementary information | Positive control        | Reactivity |             |            |   |
| Antigen                       | Clone   | Supplier                                                      | Catalog No.  | Clonality | Host animal        | Rt | Mo | Rb | GP | Pri | Dog | Sw       | Other |            |                 |             |                           |                         |            |             |            |   |
| Hepatocyte                    | OCH1E5  | Agilent Technology                                            | M715801-2    | MoAb      | Mo                 | -  | -  | -  | -  | -   | ○   | -        | -     | ~×1/25     | O/N             | 4°C         | -                         | Liver                   | ○          |             |            |   |
|                               |         |                                                               |              |           | MoAb               | Mo | -  | -  | -  | -   | -   | -        | ○     | -          | -               | -           | Prediluted                | O/N                     | 4°C        | -           | Liver      | ○ |
| Hexanoyl lysine (HEL)         | 5F12    | Japan Institute for the Control of Aging, NIKKEN SEIL Co, Ltd | MHL-021P     | MoAb      | Mo                 | ○  | -  | -  | -  | -   | -   | -        | -     | ~×1/100    | O/N             | 4°C         | -                         | Other                   | ○          |             |            |   |
| HLA-DR(MHC class II)/TAL.1B5  | TAL.1B5 | Agilent Technology                                            | M074601-2    | MoAb      | Mo                 | -  | -  | -  | -  | -   | ○   | -        | -     | ~×1/500    | O/N             | 4°C         | -                         | Lymph node              | ○          |             |            |   |
| Heat Shock Protein 60 (HSP60) | D6F1    | Cell Signaling Technology                                     | 12165        | MoAb      | Rb                 | ○  | ○  | -  | -  | -   | ○   | -        | -     | ~×1/500    | O/N             | 4°C         | -                         | Other                   | ○          |             |            |   |
| Heat Shock Protein 70 (HSP70) | -       | Santa Cruz Biotechnology, Inc.                                | sc-1060      | PoAb      | Gt                 | -  | ○  | -  | -  | -   | -   | -        | -     | ~×1/500    | O/N             | 4°C         | -                         | Brain                   | ○          |             |            |   |
| T-bet/TBX21                   | -       | LifeSpan BioSciences                                          | LS-C29739    | PoAb      | Rb                 | -  | -  | -  | -  | -   | ○   | -        | -     | ~×1/100    | O/N             | 4°C         | -                         | Lymph node              | ○          |             |            |   |
| 4-Hydroxy-2-nonenal           | HNEJ-2  | Japan Institute for the Control of Aging, NIKKEN SEIL Co, Ltd | MHN-100P     | MoAb      | Mo                 | ○  | -  | -  | -  | -   | -   | -        | -     | ~×1/100    | O/N             | 4°C         | -                         | -                       | ○          |             |            |   |
| Iba1                          | -       | FUJIFILM Wako Pure Chemical Corporation                       | 019-19741    | PoAb      | Rb                 | ○  | -  | -  | -  | -   | -   | -        | -     | ~×1/1000   | ~60m            | 37°C        | -                         | Brain                   | ○          |             |            |   |
|                               |         |                                                               |              | PoAb      | Rb                 | -  | -  | -  | -  | -   | -   | ○        | -     | -          | Cow             | ~×1/200     | ~30m                      | RT                      | -          | Lung        | ○          |   |
|                               |         |                                                               |              | PoAb      | Rb                 | ○  | ○  | -  | -  | -   | -   | -        | -     | -          | -               | ~×1/500     | O/N                       | 4°C                     | -          | Brain       | ○          |   |
|                               |         |                                                               |              | PoAb      | Rb                 | ○  | -  | -  | -  | -   | -   | -        | ○     | -          | -               | ~×1/2000    | O/N                       | 4°C                     | -          | Brain       | ○          |   |
|                               |         |                                                               |              | PoAb      | Rb                 | -  | -  | -  | -  | -   | -   | -        | ○     | -          | -               | Cow, Cat    | ~×1/50                    | O/N                     | 4°C        | -           | Lymph node | ○ |
|                               |         |                                                               |              | PoAb      | Rb                 | -  | ○  | -  | -  | -   | -   | -        | -     | -          | -               | ~×1/1000    | ~60m                      | RT                      | -          | Kidney      | ○          |   |
|                               |         |                                                               |              | PoAb      | Rb                 | ○  | -  | -  | -  | -   | -   | -        | -     | -          | ○               | ~×1/500     | ~30m                      | RT                      | -          | Brain       | ○          |   |
|                               |         |                                                               |              | PoAb      | Rb                 | -  | ○  | -  | -  | -   | -   | -        | -     | -          | -               | ~×1/500     | ~30m                      | RT                      | -          | Brain       | ○          |   |
|                               |         |                                                               |              | PoAb      | Rb                 | ○  | -  | -  | -  | -   | -   | -        | -     | -          | -               | ~×1/1000    | O/N                       | 4°C                     | -          | Other       | ○          |   |
|                               |         |                                                               |              | PoAb      | Rb                 | -  | ○  | -  | -  | -   | -   | -        | -     | -          | -               | ~×1/1000    | O/N                       | 4°C                     | -          | Other       | ○          |   |
|                               |         |                                                               |              | PoAb      | Rb                 | ○  | -  | -  | -  | -   | -   | -        | ○     | -          | -               | ~×1/1000    | ~60m                      | RT                      | -          | Brain       | ○          |   |
|                               |         |                                                               |              | PoAb      | Rb                 | -  | -  | -  | -  | -   | -   | -        | ○     | -          | -               | ~×1/500     | ~60m                      | 37°C                    | -          | Lung        | ○          |   |
|                               |         |                                                               |              | PoAb      | Rb                 | -  | ○  | -  | -  | -   | -   | -        | -     | -          | -               | ~×1/500     | O/N                       | 4°C                     | -          | Spinal cord | ○          |   |
|                               |         |                                                               |              | PoAb      | Rb                 | ○  | -  | -  | -  | -   | -   | -        | -     | -          | -               | ~×1/1000    | ~60m                      | RT                      | -          | Eye         | ○          |   |
| PoAb                          | Rb      | -                                                             | -            | -         | -                  | -  | -  | -  | ○  | -   | -   | ~×1/1000 | ~60m  | RT         | -               | Spleen      | ○                         |                         |            |             |            |   |
| -                             | -       | Bioss Inc                                                     | bs-1363R     | PoAb      | Rb                 | ○  | -  | -  | -  | -   | -   | -        | -     | ~×1/500    | O/N             | 4°C         | -                         | Spleen                  | ○          |             |            |   |
| IgG                           | -       | Agilent Technology                                            | IR51261-2J   | PoAb      | Rb                 | -  | -  | -  | -  | ○   | -   | -        | -     | Prediluted | ~60m            | RT          | -                         | Spleen                  | ○          |             |            |   |
| IL-17                         | -       | Abcam plc                                                     | ab79056      | PoAb      | Rb                 | ○  | ○  | -  | -  | -   | ○   | -        | -     | ~×1/200    | O/N             | 4°C         | -                         | Pancreas                | ○          |             |            |   |
| Influenza A Virus             | -       | Merck                                                         | AB1074       | PoAb      | Gt                 | -  | -  | -  | -  | -   | ○   | -        | -     | ~×1/100    | ~240m           | 4°C         | -                         | Influenza A virus       | ○          |             |            |   |
| iNOS                          | -       | Abcam plc                                                     | AB3523       | PoAb      | Rb                 | -  | -  | -  | -  | -   | ○   | -        | -     | ~×1/200    | O/N             | 4°C         | -                         | LPS-induced macrophages | ○          |             |            |   |
| Insulin                       | -       | Agilent Technology                                            | IR00261-2J   | PoAb      | GP                 | -  | -  | -  | -  | ○   | -   | -        | -     | Prediluted | ~30m            | RT          | -                         | Pancreas                | ○          |             |            |   |
|                               | K36aC10 | Abcam plc                                                     | ab6995       | MoAb      | Mo                 | ○  | -  | -  | -  | -   | ○   | -        | -     | ~×1/1000   | ~60m            | RT          | -                         | Pancreas                | ○          |             |            |   |
| Intrinsic factor              | -       | Fitzgerald Industries International                           | 20-IR51      | PoAb      | Rb                 | ○  | -  | -  | -  | -   | -   | -        | -     | ~×1/1000   | O/N             | 4°C         | -                         | Stomach                 | ○          |             |            |   |
| Kappa Light Chains            | -       | Agilent Technology                                            | IR50661-2J   | PoAb      | Rb                 | -  | -  | -  | -  | -   | ○   | -        | -     | Prediluted | ~60m            | RT          | -                         | Lymph node              | ○          |             |            |   |
|                               | -       | Agilent Technology                                            | IR62661-2    | MoAb      | Mo                 | -  | -  | -  | -  | -   | ○   | -        | -     | Prediluted | O/N             | 4°C         | -                         | Tumor tissue            | ○          |             |            |   |
| Ki-67                         | -       | Leica Biosystems                                              | NCL-Ki67-MM1 | MoAb      | Mo                 | ○  | ○  | -  | -  | -   | ○   | -        | -     | ~×1/100    | ~30m            | 4°C         | -                         | Other                   | ○          |             |            |   |
|                               |         |                                                               |              | MoAb      | Rb                 | ○  | ○  | -  | -  | -   | ○   | -        | -     | -          | Prediluted      | O/N         | 4°C                       | -                       | Other      | ○           |            |   |
|                               | SP6     | Nichirei Biosciences                                          | 418071       | MoAb      | Rb                 | ○  | -  | -  | -  | -   | -   | -        | -     | -          | Prediluted      | ~30m        | RT                        | -                       | Liver      | ○           |            |   |
|                               |         |                                                               |              | MoAb      | Rb                 | ○  | -  | -  | -  | -   | -   | -        | -     | -          | Prediluted      | ~60m        | RT                        | -                       | Intestine  | ○           |            |   |
|                               |         |                                                               |              | PoAb      | Rb                 | -  | ○  | -  | -  | -   | -   | -        | -     | -          | ~×1/1000        | O/N         | 4°C                       | -                       | Esophagus  | ○           |            |   |
|                               |         |                                                               |              | PoAb      | Rb                 | -  | ○  | -  | -  | -   | -   | -        | -     | -          | ~×1/200         | O/N         | 4°C                       | -                       | Intestine  | ○           |            |   |
|                               | MK167   | Novus Biologicals                                             | NB600-1252   | MoAb      | Rb                 | ○  | -  | -  | -  | -   | -   | -        | -     | ~×1/500    | O/N             | 4°C         | -                         | Liver                   | ○          |             |            |   |
|                               |         |                                                               |              | PoAb      | Rb                 | -  | ○  | -  | -  | -   | -   | -        | -     | -          | ~×1/1000        | O/N         | 4°C                       | -                       | Intestine  | ○           |            |   |
|                               | MIB-1   | Agilent Technology                                            | M724001-2    | MoAb      | Mo                 | -  | -  | -  | -  | -   | -   | ○        | -     | -          | ~×1/100         | O/N         | 4°C                       | -                       | Lymph node | ○           |            |   |
|                               |         |                                                               |              | MoAb      | Mo                 | -  | -  | -  | -  | -   | -   | -        | ○     | -          | ~×1/500         | O/N         | 4°C                       | -                       | Intestine  | ○           |            |   |
| MoAb                          |         |                                                               |              | Mo        | -                  | -  | -  | -  | -  | -   | -   | ○        | -     | ~×1/200    | ~60m            | RT          | -                         | Intestinal tract        | ○          |             |            |   |
| MoAb                          |         |                                                               |              | Mo        | -                  | -  | -  | -  | -  | -   | -   | ○        | -     | ~×1/500    | O/N             | 4°C         | -                         | Intestine               | ○          |             |            |   |

Supplementary Table 7-2 Immunological properties of primary antibodies and their respective IHC staining conditions

| Antibody                      | Primary antibody |             |              |                          |   |                                      |                          |                        |                 |                                                 |               |
|-------------------------------|------------------|-------------|--------------|--------------------------|---|--------------------------------------|--------------------------|------------------------|-----------------|-------------------------------------------------|---------------|
|                               | Fixing solution  | Fixing time | Embedding    | Antigen retrieval method |   | Solution                             | Concentration/pH/reagent | Incubation temperature | Incubation time | Blocking                                        |               |
|                               |                  |             |              | Method                   |   |                                      |                          |                        |                 | Blocking solution                               | Blocking time |
| Hepatocyte                    | 10% For          | ~1w         | P            | AU                       |   | Tris BF                              | -                        | 100°C<                 | ~10m            | Blocking One                                    | ~1hr          |
|                               | 10% For          | ~1w         | P            | AU                       |   | Citric acid BF                       | -                        | 100°C<                 | ~30m            | 10% Goat Serum                                  | ~1hr          |
| Hexanoyl lysine (HEL)         | 10% For          | Unknown     | P            | Not complied             |   | -                                    | -                        | -                      | -               | -                                               | -             |
| HLA-DR(MHC class II)/TAL.1B5  | 10% For          | ~1w         | P            | AU                       |   | Citric acid BF                       | -                        | 100°C<                 | ~30m            | 10% Goat Serum                                  | ~1hr          |
| Heat Shock Protein 60 (HSP60) | 10% For          | Unknown     | P            | MW                       |   | HistoVT One                          | -                        | -                      | ~30m            | -                                               | -             |
| Heat Shock Protein 70 (HSP70) | PFA              | ~10d        | P            | Trypsin                  |   | -                                    | 0.13%                    | 37°C                   | ~10m            | 0.5% Casein/PBS                                 | ~1hr          |
| T-bet/TBX21                   | 10% For          | Unknown     | P            | MW                       |   | Dako Target Retrieval Solution, pH 9 | -                        | -                      | ~30m            | -                                               | -             |
| 4-Hydroxy-2-nonenal           | 10% For          | Unknown     | P            | MW                       |   | HistoVT One                          | -                        | -                      | ~30m            | -                                               | -             |
| Iba1                          | PFA              | ~1d         | P            | Boil                     |   | Citric acid BF                       | -                        | 70~100°C               | ~30m            | No information                                  | -             |
|                               | 10% For          | ~1w         | P            | MW                       |   | Citric acid BF                       | 0.1M                     | 100°C<                 | ~30m            | No information                                  | -             |
|                               | 10% For          | 1y~         | P            | AU                       |   | Citric acid BF                       | -                        | 100°C<                 | ~5m             | 4% Block Ace                                    | ~1hr          |
|                               | 10% For          | ~1m         | P            | AU                       |   | Citric acid BF                       | pH6.0                    | 100°C<                 | ~30m            | Goat Serum                                      | ~1hr          |
|                               | 10% For          | ~1w         | P            | AU                       |   | Citric acid BF                       | -                        | 100°C<                 | ~30m            | -                                               | -             |
|                               | 10% For          | ~1w         | P            | AU                       |   | Citric acid BF                       | -                        | 100°C<                 | ~30m            | 3% H <sub>2</sub> O <sub>2</sub> /Protein Block | ~1hr          |
|                               | 10% For          | ~1w         | P            | PC                       |   | Citric acid BF                       | 10mM                     | 100°C<                 | ~10m            | Block Ace                                       | ~1hr          |
|                               | 10% For          | ~1w         | P            | PC                       |   | Citric acid BF                       | 10mM                     | 100°C<                 | ~10m            | Block Ace                                       | ~1hr          |
|                               | 10% For          | Unknown     | P            | PC                       |   | Citric acid BF                       | -                        | Unknown                | ~30m            | Block Ace                                       | ~1hr          |
|                               | 10% For          | Unknown     | P            | PC                       |   | Citric acid BF                       | -                        | Unknown                | ~30m            | Block Ace                                       | ~1hr          |
|                               | 10% For          | ~1d         | P            | MW                       |   | Citric acid BF                       | 0.01M                    | 70~100°C               | ~30m            | 5% Skim milk in PBS                             | ~1hr          |
|                               | 10% For          | ~1w         | P            | MW                       |   | Citric acid BF                       | -                        | 100°C<                 | ~30m            | Blocking One                                    | ~1hr          |
|                               | 10% For          | ~O/N        | P            | Not complied             |   | -                                    | -                        | -                      | -               | No information                                  | -             |
|                               | 10% For          | ~1w         | P            | MW                       |   | Citric acid BF                       | pH6.0                    | 100°C<                 | ~10m            | 2% BSA/PBS                                      | ~1hr          |
| 10% For                       | ~2d              | P           | MW           |                          | - | -                                    | -                        | ~5m                    | -               | -                                               |               |
| 10% For                       | ~1m              | P           | Not complied |                          | - | -                                    | -                        | -                      | -               | -                                               |               |
| IgG                           | 10% For          | ~1w         | P            | Proteinase               |   | -                                    | -                        | RT                     | ~5m             | 3% H <sub>2</sub> O <sub>2</sub> /Protein Block | ~1hr          |
| IL-17                         | 10% For          | Unknown     | P            | MW                       |   | HistoVT One                          | -                        | -                      | ~30m            | -                                               | -             |
| Influenza A Virus             | 10% For          | ~1w         | P            | AU                       |   | Citric acid BF                       | -                        | 100°C<                 | ~10m            | Blocking One                                    | ~1hr          |
| iNOS                          | 10% For          | ~1w         | P            | AU                       |   | Citric acid BF                       | -                        | 100°C<                 | ~10m            | Blocking One                                    | ~1hr          |
| Insulin                       | 10% For          | ~1y         | P            | Not complied             |   | -                                    | -                        | -                      | -               | Normal serum                                    | ~1hr          |
|                               | 10% For          | ~1m         | P            | Not complied             |   | -                                    | -                        | -                      | -               | Goat Serum                                      | ~1hr          |
| Intrinsic factor              | 10% For          | ~1w         | P            | AU                       |   | Citric acid BF                       | -                        | 100°C<                 | ~30m            | No information                                  | -             |
| Kappa Light Chains            | 10% For          | ~1d         | P            | Proteinase               |   | -                                    | 100µg/ml                 | -                      | -               | 5% Skim milk in PBS                             | ~1hr          |
| Ki-67                         | 10% For          | ~1w         | P            | AU                       |   | Citric acid BF                       | -                        | 100°C<                 | ~10m            | Blocking One                                    | ~1hr          |
|                               | 10% For          | Unknown     | P            | MW                       |   | Citric acid BF                       | -                        | -                      | ~30m            | -                                               | -             |
|                               | 10% For          | ~O/N        | P            | Boil                     |   | Citric acid BF                       | 10mM pH6.0               | 70~100°C               | ~60m            | Skim milk                                       | ~1hr          |
|                               | 10% For          | ~10d        | P            | PC                       |   | Citric acid BF                       | -                        | 70~100°C               | ~5m             | -                                               | -             |
|                               | 10% For          | ~1d         | P            | MW                       |   | Citric acid BF                       | 0.01M                    | 70~100°C               | ~30m            | 5% Skim milk in PBS                             | ~1hr          |
|                               | 10% For          | ~1w         | P            | AU                       |   | Citric acid BF                       | -                        | 100°C<                 | ~30m            | No information                                  | -             |
|                               | 10% For          | ~1d         | P            | PC                       |   | Citric acid BF                       | -                        | 100°C<                 | ~5m             | Block Ace                                       | ~1hr          |
|                               | 10% For          | ~1w         | P            | AU                       |   | Citric acid BF                       | -                        | 100°C<                 | ~30m            | 10% Goat Serum                                  | ~1hr          |
|                               | 10% For          | 1y~         | P            | AU                       |   | Citric acid BF                       | -                        | 100°C<                 | ~5m             | 4% Block Ace                                    | ~1hr          |
|                               | 10% For          | ~1w         | P            | PC                       |   | Immunosaver                          | -                        | 100°C<                 | ~10m            | No information                                  | -             |
|                               | 10% For          | ~1w         | P            | AU                       |   | Citric acid BF                       | -                        | 100°C<                 | ~30m            | -                                               | -             |
|                               | 10% For          | ~1w         | P            | AU                       |   | Citric acid BF                       | pH6.0                    | 100°C<                 | ~10m            | BSA                                             | ~1hr          |
|                               | 10% For          | ~1d         | P            | MW                       |   | Citric acid BF                       | 0.01 M                   | 70~100°C               | ~30m            | 5% Skim milk in PBS                             | ~1hr          |

Supplementary Table 7-3 Immunological properties of primary antibodies and their respective IHC staining conditions

| Primary antibody                                         | Secondary antibody                                  |                          |             |                 |             |         |                 | Supplementary information | Figure No. |
|----------------------------------------------------------|-----------------------------------------------------|--------------------------|-------------|-----------------|-------------|---------|-----------------|---------------------------|------------|
| Antibody                                                 | Secondary antibody information                      | Supplier                 | Catalog No. | Incubation time | Temperature | Reagent | Incubation time |                           |            |
|                                                          | Product                                             |                          |             |                 |             |         |                 |                           |            |
| Hepatocyte                                               | Histofine Simple Stain MAX-PO(MULTI)                | Nichirei                 | 424154      | ~30m            | 37°C        | DAB     | ~3m             | -                         |            |
|                                                          | EnVision+/HRP, Mouse                                | Agilent Technology       | -           | ~30m            | RT          | DAB     | ~3m             | -                         | 66         |
| Hexanoyl lysine (HEL)                                    | -                                                   | Nichirei                 | -           | -               | -           | -       | No information  | -                         |            |
| HLA-DR(MHC class II)/TAL.1B5                             | EnVision+/HRP, Mouse                                | Agilent Technology       | -           | ~30m            | RT          | DAB     | ~3m             | -                         | 67         |
| Heat Shock Protein 60 (HSP60)                            | -                                                   | Nichirei                 | -           | ~30m            | RT          | DAB     | ~3m             | -                         |            |
| Heat Shock Protein 70 (HSP70)                            | Histofine Simple Stain Mouse MAX-PO(G)              | Nichirei                 | 414351      | ~30m            | RT          | DAB     | ~10m            | -                         |            |
| T-bet/TBX21                                              | Histofine Simple Stain Rat MAX-PO(MULTI)            | Nichirei                 | 414191      | ~30m            | RT          | DAB     | ~1m             | -                         |            |
| 4-Hydroxy-2-nonenal                                      | Histofine Simple Stain Rat MAX-PO(M)                | Nichirei                 | 414171      | ~30m            | RT          | DAB     | ~5m             | -                         |            |
| Iba1                                                     | Histofine Simple Stain Rat MAX-PO(MULTI)            | Nichirei                 | 414191      | ~30m            | 37°C        | DAB     | ~10m            | -                         |            |
|                                                          | Histofine Simple Stain MAX-PO(R)                    | Nichirei                 | 424141      | ~30m            | RT          | DAB     | ~10m            | -                         |            |
|                                                          | EnVision+/HRP, Rabbit                               | Agilent Technology       | -           | ~30m            | 37°C        | DAB     | ~3m             | -                         | 68         |
|                                                          | Histofine Simple Stain MAX-PO(R)                    | Nichirei                 | 414141F     | ~30m            | RT          | DAB     | ~1m             | -                         |            |
|                                                          | LSAB Kits, Universal, HRP, Rabbit/Mouse             | Agilent Technology       | K0675       | ~10m            | RT          | DAB     | ~10s            | -                         |            |
|                                                          | Envision+ / HRP, RUO Rabbit                         | Agilent Technology       | K4003       | ~60m            | RT          | DAB     | ~1m             | -                         |            |
|                                                          | Histofine Simple Stain Rat MAX-PO(MULTI)            | Nichirei                 | 414191      | ~30m            | RT          | DAB     | ~5m             | -                         |            |
|                                                          | Histofine Simple Stain Mouse MAX-PO(R)              | Nichirei                 | 414341      | ~30m            | RT          | DAB     | ~5m             | -                         |            |
|                                                          | Histofine Simple Stain Rat MAX-PO(R)                | Nichirei                 | 414181      | ~30m            | RT          | DAB     | ~10m            | -                         |            |
|                                                          | Histofine mouse Stain Kit                           | Nichirei                 | 414321      | ~30m            | RT          | DAB     | ~10m            | -                         |            |
|                                                          | Histofine Simple Stain Rat MAX-PO(R)                | Nichirei                 | 414181      | ~60m            | RT          | DAB     | ~10m            | -                         |            |
|                                                          | Histofine Simple Stain MAX-PO(MULTI)                | Nichirei                 | 424154      | ~30m            | 37°C        | DAB     | ~3m             | -                         | 69         |
|                                                          | Alexa Fluor 555                                     | Thermo Fisher Scientific | A-31572     | ~30m            | RT          | Cy3     | No information  | -                         |            |
| Histofine Simple Stain Rat MAX-PO(MULTI) (Histo Stainer) | Nichirei                                            | 714191                   | ~30m        | RT              | DAB         | ~10m    | -               |                           |            |
| Envision+ / HRP, RUO Rabbit                              | Agilent Technology                                  | K4003                    | ~30m        | RT              | DAB         | ~20s    | -               |                           |            |
| EnVision+ Dual Link, Single Reagents, HRP                | Agilent Technology                                  | K4063                    | ~30m        | RT              | DAB         | ~3m     | -               |                           |            |
| IgG                                                      | Envision+ / HRP, RUO Rabbit                         | Agilent Technology       | K4003       | ~30m            | RT          | DAB     | ~1m             | -                         |            |
| IL-17                                                    | Histofine Simple Stain Rat MAX-PO(MULTI)            | Nichirei                 | 414191      | ~30m            | RT          | DAB     | ~3m             | -                         |            |
| Influenza A Virus                                        | Histofine Simple Stain MAX-PO(G)                    | Nichirei                 | 414162      | ~30m            | 37°C        | DAB     | ~3m             | -                         |            |
| iNOS                                                     | Histofine Simple Stain MAX-PO(MULTI)                | Nichirei                 | 424154      | ~30m            | 37°C        | DAB     | ~3m             | -                         | 70         |
| Insulin                                                  | VECTASTAIN ABC-HRP Kit, Peroxidase (Guinea pig IgG) | Vector Laboratories      | PK-4007     | ~30m            | RT          | DAB     | ~10m            | -                         | 71         |
|                                                          | Histofine Simple Stain Rat MAX-PO(MULTI)            | Nichirei                 | 414191F     | ~30m            | RT          | DAB     | ~1m             | -                         | 72         |
| Intrinsic factor                                         | VECTASTAIN Elite ABC Kit(rabbit IgG)                | Vector Laboratories      | PK-6101     | ~30m            | RT          | DAB     | ~5m             | -                         | 73         |
| Kappa Light Chains                                       | Histofine Simple Stain Rat MAX-PO(R)                | Nichirei                 | 414181      | ~60m            | RT          | DAB     | ~10m            | -                         | 74         |
| Ki-67                                                    | Histofine Simple Stain MAX-PO(MULTI)                | Nichirei                 | 424154      | ~30m            | 37°C        | DAB     | ~3m             | -                         | 75         |
|                                                          | -                                                   | -                        | -           | -               | -           | -       | No information  | -                         |            |
|                                                          | EnVision+/HRP, Rabbit                               | Agilent Technology       | -           | ~60m            | RT          | DAB     | ~5m             | -                         | 76         |
|                                                          | Histofine Simple Stain Rat MAX-PO(MULTI)            | Nichirei                 | 414191      | ~30m            | RT          | DAB     | ~5m             | -                         |            |
|                                                          | Histofine Simple Stain Rat MAX-PO(R)                | Nichirei                 | 414181      | ~60m            | RT          | DAB     | ~10m            | -                         |            |
|                                                          | Envision+ / HRP, RUO Rabbit                         | Agilent Technology       | K4002       | ~30m            | RT          | DAB     | ~5m             | -                         | 77         |
|                                                          | Histofine Simple Stain Mouse MAX-PO(R)              | Nichirei                 | 414341      | ~30m            | RT          | DAB     | ~3m             | -                         |            |
|                                                          | Histofine SAB- PO(R)                                | Nichirei                 | 424031      | ~10m            | RT          | DAB     | ~20s            | -                         | 78         |
|                                                          | EnVision+/HRP, Rabbit                               | Agilent Technology       | -           | ~30m            | 37°C        | DAB     | ~3m             | -                         |            |
|                                                          | Histofine Simple Stain Mouse MAX-PO(R)              | Nichirei                 | 414341      | ~30m            | RT          | DAB     | ~1m             | -                         |            |
| LSAB Kits, Universal, HRP, Rabbit/Mouse                  | Agilent Technology                                  | K0675                    | ~10m        | RT              | DAB         | ~10s    | -               |                           |            |
| Histofine Simple Stain Rat MAX-PO(M)                     | Nichirei                                            | 414171                   | ~30m        | RT              | DAB         | ~5m     | -               |                           |            |
| Histofine Simple Stain Rat MAX-PO(M)                     | Nichirei                                            | 414171                   | ~60m        | RT              | DAB         | ~10m    | -               |                           |            |

Supplementary Table 8-1 Immunological properties of primary antibodies and their respective IHC staining conditions

| Primary antibody                      |                 |                                          |                   |           |             |                    |    |    |    |     |     |    |            |          |                 |             |                                             |                         |            |         |   |
|---------------------------------------|-----------------|------------------------------------------|-------------------|-----------|-------------|--------------------|----|----|----|-----|-----|----|------------|----------|-----------------|-------------|---------------------------------------------|-------------------------|------------|---------|---|
| Antibody                              |                 |                                          |                   |           |             | Species reactivity |    |    |    |     |     |    |            | Dilution | Incubation time | Temperature | Supplementary information                   | Positive control        | Reactivity |         |   |
| Antigen                               | Clone           | Supplier                                 | Catalog No.       | Clonality | Host animal | Rt                 | Mo | Rb | GP | Pri | Dog | Sw | Other      |          |                 |             |                                             |                         |            |         |   |
| KIM-1/ Tim-1                          | -               | R&D Systems                              | AF3689            | PoAb      | Gt          | ○                  | -  | -  | -  | -   | -   | -  | -          | ~×1/100  | O/N             | 4°C         | -                                           | Kidney                  | ○          |         |   |
|                                       | -               |                                          |                   | PoAb      | Gt          | ○                  | -  | -  | -  | -   | -   | -  | -          | -        | ~×1/1000        | O/N         | 4°C                                         | -                       | Kidney     | ○       |   |
|                                       | -               |                                          |                   | PoAb      | Gt          | ○                  | -  | -  | -  | -   | -   | -  | -          | -        | ~×1/200         | O/N         | 4°C                                         | -                       | Kidney     | ○       |   |
|                                       | -               |                                          |                   | PoAb      | Gt          | ○                  | -  | -  | -  | -   | -   | -  | -          | -        | ~×1/200         | O/N         | 4°C                                         | -                       | Kidney     | ○       |   |
| Laminin                               | -               | Sigma-Aldrich                            | L9393             | PoAb      | Rb          | ○                  | -  | -  | -  | -   | -   | -  | ~×1/100    | O/N      | 4°C             | -           | Skin                                        | ○                       |            |         |   |
| LAMP-1                                | -               | Sigma-Aldrich                            | L1418             | PoAb      | Rb          | ○                  | ○  | -  | -  | -   | -   | -  | -          | ~×1/100  | O/N             | 4°C         | -                                           | -                       | ○          |         |   |
|                                       | -               | Abcam plc                                | ab24170           | PoAb      | Rb          | ○                  | ○  | -  | -  | -   | ○   | -  | -          | ~×1/200  | O/N             | 4°C         | -                                           | -                       | ○          |         |   |
| LAMP-2                                | AMC2            | Thermo Fisher Scientific                 | 51-2200           | PoAb      | Rb          | ○                  | ○  | -  | -  | -   | -   | -  | -          | ~×1/200  | ~60m            | RT          | -                                           | Liver(Phospholipidosis) | ○          |         |   |
|                                       |                 |                                          |                   | PoAb      | Rb          | ○                  | -  | -  | -  | -   | -   | -  | -          | -        | ~×1/500         | ~60m        | RT                                          | -                       | Liver      | ○       |   |
|                                       |                 |                                          |                   | PoAb      | Rb          | ○                  | ○  | -  | -  | -   | -   | -  | -          | -        | -               | ~×1/500     | ~60m                                        | RT                      | -          | Stomach | ○ |
|                                       |                 |                                          |                   | PoAb      | Rb          | ○                  | -  | -  | -  | -   | -   | -  | -          | -        | -               | ~×1/500     | ~60m                                        | RT                      | -          | Kidney  | ○ |
|                                       |                 |                                          |                   | PoAb      | Rb          | ○                  | ○  | -  | -  | -   | -   | -  | -          | -        | -               | ~×1/1000    | O/N                                         | 4°C                     | -          | Other   | ○ |
|                                       |                 |                                          |                   | PoAb      | Rb          | ○                  | ○  | -  | -  | -   | -   | -  | -          | -        | -               | ~×1/1000    | O/N                                         | 4°C                     | -          | -       | ○ |
|                                       | -               | LifeSpan Biosciences (LSBio)             | LS-B3144-50       | MoAb      | Mo          | ○                  | ○  | -  | -  | -   | -   | -  | -          | ~×1/500  | O/N             | 4°C         | -                                           | -                       | ○          |         |   |
|                                       | -               |                                          |                   | MoAb      | Mo          | -                  | -  | -  | -  | -   | ○   | -  | -          | -        | ~×1/1000        | O/N         | 4°C                                         | -                       | Other      | ○       |   |
| LC3                                   | -               | MBL International                        | PM036             | PoAb      | Rb          | ○                  | ○  | -  | -  | -   | ○   | -  | -          | ~×1/1000 | O/N             | 4°C         | -                                           | Other                   | ○          |         |   |
|                                       | -               |                                          |                   | PoAb      | Rb          | -                  | ○  | -  | -  | -   | ○   | -  | -          | -        | ~×1/500         | O/N         | 4°C                                         | -                       | Kidney     | ○       |   |
|                                       | 5F10            | NanoTools                                | 0231-100/LC3-5F10 | MoAb      | Mo          | ○                  | -  | -  | -  | -   | -   | -  | -          | ~×1/200  | ~60m            | RT          | -                                           | Kidney                  | ○          |         |   |
| LDH                                   | -               | Santa Cruz Biotechnology, Inc.           | SC-33781          | PoAb      | Rb          | ○                  | -  | -  | -  | -   | -   | -  | ~×1/200    | ~60m     | RT              | -           | Liver                                       | ○                       |            |         |   |
| <i>Dolichos biflorus</i> Lectin (DBA) | Labeled antigen | EY Laboratories                          | H-1201-1          | -         | -           | ○                  | -  | -  | -  | -   | -   | -  | ~×1/25     | O/N      | 4°C             | -           | Kidney                                      | ○                       |            |         |   |
| LH                                    | -               | Thermo Scientific                        | PA1-23783         | PoAb      | Rb          | ○                  | ○  | -  | -  | -   | -   | -  | ~×1/100    | O/N      | 4°C             | -           | Pituitary                                   | ○                       |            |         |   |
| Lipocalin-2 /NGAL                     | -               | R&D Systems                              | AF1757            | PoAb      | Gt          | ○                  | -  | -  | -  | -   | -   | -  | ~×1/200    | O/N      | 4°C             | -           | Kidney                                      | ○                       |            |         |   |
| MAC-2                                 | M3/38           | Cedarlane Laboratories                   | CL8942AP          | MoAb      | Rt          | -                  | ○  | -  | -  | -   | -   | -  | -          | ~×1/1000 | O/N             | 4°C         | -                                           | Lung                    | ○          |         |   |
|                                       |                 |                                          |                   | MoAb      | Rt          | -                  | ○  | -  | -  | -   | -   | -  | -          | -        | ~×1/50          | O/N         | 4°C                                         | -                       | Skin       | ○       |   |
| MAC-3                                 | M3/84           | BD Pharmingen Inc.                       | 550292            | MoAb      | Rt          | -                  | ○  | -  | -  | -   | -   | -  | ~×1/50     | O/N      | 4°C             | -           | Lymph node                                  | ○                       |            |         |   |
| Macrophage                            | RM0029-11H3     | Abcam plc                                | ab56297           | MoAb      | Rt          | -                  | ○  | -  | -  | -   | -   | -  | ~×1/100    | ~60m     | RT              | -           | Eye                                         | ○                       |            |         |   |
| Myelin Basic Protein                  | 26              | Merck                                    | MAB384            | MoAb      | Mo          | ○                  | -  | -  | -  | -   | ○   | -  | ~×1/1000   | ~60m     | RT              | -           | Brain                                       | ○                       |            |         |   |
|                                       | -               | Abcam plc                                | ab40390           | PoAb      | Rb          | ○                  | -  | -  | -  | -   | -   | -  | ~×1/100    | O/N      | 4°C             | -           | Nerve                                       | ○                       |            |         |   |
|                                       | -               | Sigma-Aldrich                            | M3821             | PoAb      | Rb          | ○                  | ○  | -  | -  | -   | -   | -  | ~×1/100    | O/N      | 4°C             | -           | Nerve                                       | ○                       |            |         |   |
| MCM7                                  | EP1974Y         | Abcam plc                                | ab52489           | MoAb      | Rb          | ○                  | ○  | -  | -  | -   | -   | -  | ~×1/1000   | ~60m     | RT              | -           | Intestine                                   | ○                       |            |         |   |
| MDA                                   | 1F83            | Japan Institute for the Control of Aging | MMD-030n          | MoAb      | Mo          | ○                  | -  | -  | -  | -   | -   | -  | ~×1/100    | O/N      | 4°C             | -           | Other                                       | △                       |            |         |   |
| Melan A                               | A103            | Agilent Technology                       | M719601-2         | MoAb      | Mo          | -                  | -  | -  | -  | ○   | -   | -  | -          | ~×1/50   | ~60m            | RT          | -                                           | Skin                    | ○          |         |   |
|                                       |                 |                                          |                   | MoAb      | Mo          | -                  | -  | -  | -  | -   | ○   | -  | -          | -        | ~×1/200         | ~30m        | RT                                          | -                       | Skin       | ○       |   |
|                                       |                 |                                          |                   | MoAb      | Mo          | ○                  | -  | -  | -  | -   | -   | ○  | -          | -        | ~×1/200         | ~60m        | RT                                          | -                       | Skin       | ○       |   |
|                                       |                 |                                          |                   | MoAb      | Mo          | -                  | -  | -  | -  | -   | -   | ○  | -          | -        | ~×1/50          | O/N         | 4°C                                         | -                       | Melanoma   | ○       |   |
| Melanoma                              | PNL2            | Nichirei                                 | 413381            | MoAb      | Mo          | -                  | -  | -  | -  | -   | ○   | -  | Prediluted | O/N      | 4°C             | -           | Skin                                        | ○                       |            |         |   |
|                                       |                 |                                          |                   | MoAb      | Mo          | ○                  | -  | -  | -  | -   | ○   | -  | -          | ~×1/100  | ~60m            | RT          | -                                           | Skin                    | ○          |         |   |
| Mesothelin                            | -               | Immuno-Biological Laboratories Co., Ltd. | 28001             | PoAb      | Rb          | ○                  | -  | -  | -  | -   | -   | -  | ~×1/200    | O/N      | 4°C             | -           | Heart                                       | ○                       |            |         |   |
|                                       |                 |                                          |                   | PoAb      | Rb          | ○                  | -  | -  | -  | -   | -   | -  | -          | ~×1/200  | ~30m            | RT          | Diluted with IMMUNOSHOT immunostaining Fine | Other                   | ○          |         |   |
|                                       |                 |                                          |                   | PoAb      | Rb          | -                  | ○  | -  | -  | -   | -   | -  | -          | ~×1/200  | ~30m            | RT          | Diluted with IMMUNOSHOT immunostaining Fine | Lung                    | ○          |         |   |
| MHC Class II (RT1B)                   | OX-6            | Bio-Rad Laboratories, Inc.               | MCA46R            | MoAb      | Mo          | ○                  | ○  | -  | -  | -   | -   | -  | ~×1/100    | ~60m     | RT              | -           | Spleen                                      | ○                       |            |         |   |
|                                       |                 |                                          |                   | MoAb      | Mo          | ○                  | -  | -  | -  | -   | -   | -  | -          | ~×1/500  | ~60m            | RT          | -                                           | Liver                   | ○          |         |   |

Supplementary Table 8-2 Immunological properties of primary antibodies and their respective IHC staining conditions

| Antibody                              | Primary antibody |             |           |                          |  |                                          |                          |                        |                 |                                                 |               |
|---------------------------------------|------------------|-------------|-----------|--------------------------|--|------------------------------------------|--------------------------|------------------------|-----------------|-------------------------------------------------|---------------|
|                                       | Fixing solution  | Fixing time | Embedding | Antigen retrieval method |  | Solution                                 | Concentration/pH/reagent | Incubation temperature | Incubation time | Blocking                                        |               |
|                                       |                  |             |           | Method                   |  |                                          |                          |                        |                 | Blocking solution                               | Blocking time |
| KIM-1/ Tim-1                          | 10% For          | 1y~         | P         | AU                       |  | Citric acid BF                           | -                        | 100°C<                 | ~5m             | 4% Block Ace                                    | ~1hr          |
|                                       | 10% For          | ~2d         | P         | Not complied             |  | -                                        | -                        | -                      | -               | No information                                  | -             |
|                                       | 10% For          | Unknown     | P         | MW                       |  | Citric acid BF                           | -                        | Unknown                | ~30m            | Block Ace                                       | ~1hr          |
|                                       | PFA              | Unknown     | P         | MW                       |  | Citric acid BF                           | -                        | -                      | ~30m            | -                                               | -             |
| Laminin                               | 10% For          | 1y~         | P         | Proteinase               |  | -                                        | 0.4mg/mL                 | RT                     | ~30m            | 4% Block Ace                                    | ~1hr          |
| LAMP-1                                | 10% For          | Unknown     | P         | MW                       |  | HistoVT One                              | -                        | -                      | ~30m            | -                                               | -             |
|                                       | 10% For          | Unknown     | P         | MW                       |  | HistoVT One                              | -                        | -                      | ~30m            | -                                               | -             |
| LAMP-2                                | 10% For          | ~1w         | P         | MW                       |  | Citric acid BF                           | -                        | 100°C<                 | ~30m            | -                                               | -             |
|                                       | 10% For          | ~1y         | P         | MW                       |  | -                                        | -                        | 100°C<                 | ~5m             | Skim milk                                       | ~1hr          |
|                                       | 10% For          | ~O/N        | P         | Not complied             |  | -                                        | -                        | -                      | -               | 3% H <sub>2</sub> O <sub>2</sub> /Protein Block | ~1hr          |
|                                       | PFA              | ~2d         | P         | Not complied             |  | -                                        | -                        | -                      | -               | 3% H <sub>2</sub> O <sub>2</sub> /Protein Block | ~1hr          |
|                                       | 10% For          | ~1m         | P         | AU                       |  | Citric acid BF                           | pH6.0                    | 100°C<                 | ~10m            | Goat Serum                                      | ~1hr          |
|                                       | 10% For          | Unknown     | P         | Not complied             |  | -                                        | -                        | -                      | -               | -                                               | -             |
|                                       | 10% For          | Unknown     | P         | MW                       |  | HistoVT One                              | -                        | -                      | ~30m            | -                                               | -             |
|                                       | 10% For          | Unknown     | P         | MW                       |  | Immunosaver                              | -                        | 100°C<                 | ~60m            | No information                                  | -             |
| LC3                                   | 10% For          | ~1m         | P         | AU                       |  | Citric acid BF                           | pH6.0                    | 100°C<                 | ~10m            | Goat Serum                                      | ~1hr          |
|                                       | 10% For          | ~O/N        | P         | MW                       |  | HistoVT One                              | -                        | -                      | ~30m            | -                                               | -             |
|                                       | PFA              | ~2d         | P         | Boil                     |  | Citric acid BF                           | 10mM pH6.0               | 70~100°C               | ~60m            | Skim milk                                       | ~1hr          |
| LDH                                   | 10% For          | ~2d         | P         | AU                       |  | EDTA                                     | -                        | 100°C<                 | ~10m            | 3% H <sub>2</sub> O <sub>2</sub> /Protein Block | ~1hr          |
| LDH                                   | 10% For          | ~1w         | P         | Not complied             |  | -                                        | -                        | -                      | -               | Block Ace                                       | ~1hr          |
| <i>Dolichos biflorus</i> Lectin (DBA) | 10% For          | ~1m         | P         | Not complied             |  | -                                        | -                        | -                      | -               | Not complied                                    | -             |
| LH                                    | 10% For          | Unknown     | P         | MW                       |  | HistoVT One                              | -                        | -                      | ~30m            | -                                               | -             |
| Lipocalin-2 /NGAL                     | 10% For          | Unknown     | P         | Trypsin / AU             |  | - / Citric acid BF                       | 0.1% / -                 | 37°C / 100°C<          | ~5m / ~5m       | Block Ace                                       | ~1hr          |
| MAC-2                                 | 10% For          | ~1w         | P         | Not complied             |  | -                                        | -                        | -                      | -               | No information                                  | -             |
|                                       | 10% For          | ~1w         | P         | PC                       |  | Citric acid BF                           | 0.01M                    | 100°C<                 | ~5m             | 3% H <sub>2</sub> O <sub>2</sub>                | ~1hr          |
| MAC-3                                 | 10% For          | ~2d         | P         | MW                       |  | Citric acid BF                           | -                        | 70~100°C               | ~30m            | Swine serum(x500)                               | ~1hr          |
| Macrophage                            | 10% For          | ~1d         | P         | Proteinase               |  | -                                        | Ready to use             | RT                     | ~10m            | 2% BSA/PBS                                      | ~1hr          |
| Myelin Basic Protein                  | 10% For          | ~1d         | P         | MW                       |  | Citric acid BF                           | 0.01 M                   | 70~100°C               | ~30m            | 5% Skim milk in PBS                             | ~1hr          |
|                                       | DA               | Unknown     | P         | MW                       |  | Citric acid BF                           | -                        | Unknown                | ~10m            | Block Ace                                       | ~1hr          |
|                                       | 10% For          | 1y~         | P         | AU                       |  | Citric acid BF                           | -                        | 100°C<                 | ~5m             | 4% Block Ace                                    | ~1hr          |
| MCM7                                  | 10% For          | ~1w         | P         | MW                       |  | Citric acid BF                           | 0.01M                    | 70~100°C               | ~30m            | No information                                  | -             |
| MDA                                   | Bo               | ~O/N        | P         | Not complied             |  | -                                        | -                        | -                      | -               | -                                               | -             |
| Melan A                               | 10% For          | ~10d        | P         | AU                       |  | EDTA                                     | -                        | 100°C<                 | ~10m            | 0.5% Casein/TBS                                 | ~1hr          |
|                                       | 10% For          | ~1w         | P         | MW                       |  | Citric acid BF                           | 0.1M                     | 100°C<                 | ~30m            | No information                                  | -             |
|                                       | 10% For          | ~1d         | P         | MW                       |  | Tris-EDTA (10 mM Tris/1 mM EDTA, pH 9.0) | 1mM                      | 70~100°C               | ~30m            | 5% Skim milk in PBS                             | ~1hr          |
|                                       | 10% For          | ~1w         | P         | AU                       |  | EDTA                                     | -                        | 100°C<                 | ~5m             | 10% Goat Serum                                  | ~1hr          |
|                                       | 10% For          | ~1w         | P         | AU                       |  | Citric acid BF                           | -                        | 100°C<                 | ~30m            | -                                               | -             |
| Melanoma                              | 10% For          | ~1d         | P         | MW                       |  | Tris-EDTA (10 mM Tris/1 mM EDTA, pH 9.0) | 1mM                      | 70~100°C               | ~30m            | 5% Skim milk in PBS                             | ~1hr          |
|                                       | 10% For          | ~1w         | P         | AU                       |  | Citric acid BF                           | -                        | 100°C<                 | ~30m            | 10% Goat Serum                                  | ~1hr          |
| Mesothelin                            | 10% For          | 1y~         | P         | AU                       |  | Citric acid BF                           | -                        | 100°C<                 | ~5m             | 4% Block Ace                                    | ~1hr          |
|                                       | 10% For          | ~1w         | P         | Not complied             |  | -                                        | -                        | -                      | -               | Block Ace                                       | ~1hr          |
|                                       | 10% For          | ~1w         | P         | Not complied             |  | -                                        | -                        | -                      | -               | Block Ace                                       | ~1hr          |
| MHC Class II (RT1B)                   | Zamboni          | ~1w         | P         | Proteinase               |  | -                                        | -                        | RT                     | ~10m            | Goat Serum                                      | ~1hr          |
|                                       | PLP              | ~O/N        | P         | Proteinase / MW          |  | - / Citric acid BF                       | 100ug/ml / 0.01M         | RT / 70~100°C          | ~10m / ~30m     | 5% Skim milk in PBS                             | ~1hr          |

Supplementary Table 8-3 Immunological properties of primary antibodies and their respective IHC staining conditions

| Primary antibody                      | Secondary antibody                                                                     |                     |               |                 |             |         |                 | Supplementary information                     | Figure No. |
|---------------------------------------|----------------------------------------------------------------------------------------|---------------------|---------------|-----------------|-------------|---------|-----------------|-----------------------------------------------|------------|
| Antibody                              | Secondary antibody information                                                         | Supplier            | Catalog No.   | Incubation time | Temperature | Reagent | Incubation time |                                               |            |
|                                       | Product                                                                                |                     |               |                 |             |         |                 |                                               |            |
| KIM-1/ Tim-1                          | Biotinylated Anti-Goat Immunoglobulins                                                 | Agilent Technology  | -             | ~30m            | 37°C        | DAB     | ~3m             | -                                             | 79         |
|                                       | Biotinylated Rabbit Anti-Goat IgG Antibody                                             | Vector Laboratories | BA-5000       | ~30m            | RT          | DAB     | ~5m             | -                                             |            |
|                                       | Histofine Simple Stain Rat MAX-PO(G)                                                   | Nichirei            | 414331        | ~30m            | RT          | DAB     | ~3m             | -                                             |            |
|                                       | Histofine Simple Stain Rat MAX-PO(G)                                                   | Nichirei            | 414331        | -               | -           | -       | No information  | -                                             |            |
| Laminin                               | EnVision+/HRP, Rabbit                                                                  | Agilent Technology  | -             | ~30m            | 37°C        | DAB     | ~3m             | -                                             |            |
| LAMP-1                                | Histofine Simple Stain Rat MAX-PO(R)                                                   | Nichirei            | 414181        | ~30m            | RT          | DAB     | ~5m             | Contrast is better without antigen retrieval. |            |
|                                       | Histofine Simple Stain Rat MAX-PO(R)                                                   | Nichirei            | 414181        | ~30m            | RT          | DAB     | ~5m             | -                                             |            |
| LAMP-2                                | Histofine Simple Stain mouse/rat MAX-PO(R)                                             | Nichirei            | 414341/414181 | ~30m            | RT          | DAB     | ~3m             | -                                             |            |
|                                       | Envision+ / HRP, RUO Rabbit                                                            | Agilent Technology  | K4002         | ~30m            | RT          | DAB     | ~10s            | -                                             | 80         |
|                                       | Envision+ / HRP, RUO Rabbit                                                            | Agilent Technology  | K4003         | ~30m            | RT          | DAB     | ~30s            | -                                             |            |
|                                       | Envision+ / HRP, RUO Rabbit                                                            | Agilent Technology  | K4003         | ~30m            | RT          | DAB     | ~30s            | -                                             |            |
|                                       | Histofine Simple Stain Rat MAX-PO(MULTI)                                               | Nichirei            | 414191F       | ~30m            | RT          | DAB     | ~1m             | -                                             |            |
|                                       | Histofine Simple Stain Rat MAX-PO(R)                                                   | Nichirei            | 414181        | ~30m            | RT          | DAB     | ~3m             | -                                             |            |
|                                       | Histofine Simple Stain Rat MAX-PO(M)                                                   | Nichirei            | 414171        | ~30m            | RT          | DAB     | ~5m             | -                                             |            |
|                                       | Histofine Simple Stain Rat MAX-PO(MULTI)                                               | Nichirei            | 414191        | ~30m            | RT          | DAB     | ~30s            | -                                             | 81         |
| LC3                                   | Histofine Simple Stain Rat MAX-PO(R)                                                   | Nichirei            | 414181        | ~30m            | RT          | DAB     | ~10m            | -                                             |            |
|                                       | EnVision+/HRP, Rabbit                                                                  | Agilent Technology  | -             | ~60m            | RT          | DAB     | ~5m             | -                                             | 82         |
|                                       | Histofine Simple Stain rat MAX-PO(M)                                                   | Nichirei            | 414171        | ~60m            | RT          | DAB     | ~3m             | -                                             |            |
| LDH                                   | Histofine Simple Stain Rat MAX-PO(MULTI)                                               | Nichirei            | 414191        | ~30m            | RT          | DAB     | ~10m            | -                                             |            |
| <i>Dolichos biflorus</i> Lectin (DBA) | Not complied                                                                           | -                   | -             | -               | -           | DAB     | ~3m             | -                                             |            |
| LH                                    | Histofine Simple Stain Rat MAX-PO(MULTI)                                               | Nichirei            | 414191        | -               | -           | -       | No information  | -                                             |            |
| Lipocalin-2 /NGAL                     | Histofine Simple Stain Rat MAX-PO(G)                                                   | Nichirei            | 414331        | ~30m            | RT          | DAB     | ~3m             | -                                             |            |
| MAC-2                                 | Histofine Simple Stain Mouse MAX-PO(Rat)                                               | Nichirei            | 414311        | ~30m            | RT          | DAB     | ~5m             | -                                             |            |
|                                       | Rabbit Anti-Rat Immunoglobulins/Biotinylated / LSAB Kits, Universal, HRP, Rabbit/Mouse | Agilent Technology  | E0468 / K0675 | ~30m            | RT          | DAB     | ~1m             | E0468: Discontinued                           | 83         |
| MAC-3                                 | Histofine Simple Stain Rat MAX-PO(R)                                                   | Nichirei            | 414181        | ~30m            | 37°C        | DAB     | ~10m            | -                                             | 84         |
| Macrophage                            | Histofine Simple Stain Mouse MAX-PO(Rat)                                               | Nichirei            | 414311        | ~30m            | RT          | DAB     | ~10m            | -                                             |            |
| Myelin Basic Protein                  | Histofine Simple Stain Rat MAX-PO(M)                                                   | Nichirei            | 414171        | ~60m            | RT          | DAB     | ~10m            | -                                             | 85         |
|                                       | Histofine Simple Stain Rat MAX-PO(MULTI)                                               | Nichirei            | 414191        | ~30m            | RT          | DAB     | ~3m             | -                                             |            |
|                                       | EnVision+/HRP, Rabbit                                                                  | Agilent Technology  | -             | ~30m            | 37°C        | DAB     | ~3m             | -                                             | 86         |
| MCM7                                  | Rabbit Immunoglobulins                                                                 | Agilent Technology  | E0431         | ~30m            | RT          | DAB     | ~5m             | -                                             |            |
| MDA                                   | Histofine Simple Stain Rat MAX-PO(M)                                                   | Nichirei            | 414171        | ~30m            | RT          | DAB     | 20m<            | -                                             | 87         |
| Melan A                               | Histofine Simple Stain MAX-PO(MULTI)                                                   | Nichirei            | 424154        | ~30m            | RT          | DAB     | ~20m            | -                                             | 88         |
|                                       | Histofine Simple Stain MAX-PO(M)                                                       | Nichirei            | 424131        | ~30m            | RT          | DAB     | ~10m            | -                                             |            |
|                                       | Histofine Simple Stain Rat MAX-PO(M)                                                   | Nichirei            | 414171        | ~60m            | RT          | DAB     | ~10m            | -                                             | 89         |
|                                       | EnVision+/HRP, Mouse                                                                   | Agilent Technology  | -             | ~30m            | RT          | DAB     | ~3m             | -                                             |            |
| Melanoma                              | LSAB Kits, Universal, HRP, Rabbit/Mouse                                                | Agilent Technology  | K0675         | ~10m            | RT          | DAB     | ~10s            | -                                             |            |
|                                       | Histofine Simple Stain Rat MAX-PO(M)                                                   | Nichirei            | 414171        | ~60m            | RT          | DAB     | ~10m            | -                                             | 90         |
| Mesothelin                            | EnVision+/HRP, Rabbit                                                                  | Agilent Technology  | -             | ~30m            | RT          | DAB     | ~3m             | -                                             | 91         |
|                                       | EnVision+/HRP, Rabbit                                                                  | Agilent Technology  | -             | ~30m            | 37°C        | DAB     | ~3m             | -                                             | 92         |
|                                       | Histofine Simple Stain Rat MAX-PO(MULTI)                                               | Nichirei            | 414191        | ~30m            | RT          | DAB     | ~5m             | -                                             |            |
| MHC Class II (RT1B)                   | Histofine Simple Stain Mouse MAX-PO(R)                                                 | Nichirei            | 414341        | ~30m            | RT          | DAB     | ~5m             | -                                             |            |
|                                       | Histofine Simple Stain Rat MAX-PO(MULTI)                                               | Nichirei            | 414191F       | ~30m            | RT          | DAB     | ~1m             | -                                             |            |
|                                       | Histofine Simple Stain Rat MAX-PO(M)                                                   | Nichirei            | 414171        | ~60m            | RT          | DAB     | ~10m            | -                                             | 93         |



Supplementary Table 9-1 Immunological properties of primary antibodies and their respective IHC staining conditions

| Primary antibody              |                   |                                          |             |           |             |                    |    |    |    |     |     |    |            |            |                 |             |                           |                  |            |       |
|-------------------------------|-------------------|------------------------------------------|-------------|-----------|-------------|--------------------|----|----|----|-----|-----|----|------------|------------|-----------------|-------------|---------------------------|------------------|------------|-------|
| Antibody                      |                   |                                          |             |           |             | Species reactivity |    |    |    |     |     |    |            | Dilution   | Incubation time | Temperature | Supplementary information | Positive control | Reactivity |       |
| Antigen                       | Clone             | Supplier                                 | Catalog No. | Clonality | Host animal | Rt                 | Mo | Rb | GP | Pri | Dog | Sw | Other      |            |                 |             |                           |                  |            |       |
| MitF                          | 34CA5             | Novocastra (Leica Biosystems)            | MITF-L      | MoAb      | Mo          | -                  | -  | -  | -  | -   | ○   | -  | -          | ~×1/100    | O/N             | 4°C         | -                         | Melanoma         | ○          |       |
|                               | C5                | Exalpha Biologicals                      | X1405M      | MoAb      | Mo          | ○                  | -  | -  | -  | -   | -   | -  | -          | ~×1/1000   | ~60m            | RT          | -                         | Eye              | ○          |       |
| Mitochondrial Creatine Kinase | -                 | Bioss Inc                                | -           | PoAb      | Rb          | ○                  | -  | -  | -  | -   | -   | -  | -          | ~×1/500    | O/N             | 4°C         | -                         | Brain            | ○          |       |
| mTOR                          | 7C10              | Cell Signaling Technology                | 2983        | MoAb      | Rb          | -                  | -  | -  | -  | -   | -   | ○  | -          | ~×1/50     | O/N             | 4°C         | -                         | Vessel           | ○          |       |
| MUC-1                         | -                 | Boster Immunoleader                      | A00187      | PoAb      | Rb          | ○                  | -  | -  | -  | ○   | -   | -  | -          | ~×1/500    | ~60m            | RT          | -                         | Lung             | ○          |       |
| MUM1protein                   | MUM1p             | Agilent Technology                       | M725901-2   | MoAb      | Mo          | -                  | -  | -  | -  | -   | ○   | -  | -          | ~×1/25     | O/N             | 4°C         | -                         | Lymph node       | ○          |       |
| MyoD1                         | 5.8A              | Agilent Technology                       | M351201-2   | MoAb      | Mo          | -                  | -  | -  | -  | -   | ○   | -  | -          | ~×1/50     | O/N             | 4°C         | -                         | Labdomyosarcoma  | ○          |       |
| β2-microglobulin              | -                 | Lifespan Biosciences                     | LS-B331     | PoAb      | Rb          | ○                  | -  | -  | -  | -   | -   | -  | -          | ~×1/200    | O/N             | 4°C         | -                         | Kidney           | ○          |       |
| Myogenin                      | F5D               | Abcam plc                                | ab1835      | MoAb      | Mo          | ○                  | -  | -  | -  | -   | -   | -  | -          | ~×1/1000   | O/N             | 4°C         | -                         | Muscle           | ○          |       |
| Myoglobin                     | EP3081Y           | Abcam plc                                | ab77232     | MoAb      | Rb          | -                  | ○  | -  | -  | -   | -   | -  | -          | ~×1/1000   | ~60m            | RT          | -                         | Muscle           | ○          |       |
|                               |                   |                                          |             | MoAb      | Rb          | ○                  | -  | -  | -  | -   | -   | -  | -          | -          | ~×1/1000        | ~60m        | RT                        | -                | Muscle     | ○     |
| Nephrin (c)                   | -                 | Immuno-Biological Laboratories Co., Ltd. | 29070       | PoAb      | Rb          | ○                  | -  | -  | -  | -   | -   | -  | -          | ~×1/25     | O/N             | 4°C         | -                         | Kidney           | ○          |       |
| Nestin                        | rat-401           | Merck                                    | MAB353      | MoAb      | Mo          | ○                  | -  | -  | -  | -   | -   | -  | -          | ~×1/100    | O/N             | 4°C         | -                         | Nerve            | ○          |       |
|                               |                   |                                          |             | MoAb      | Mo          | ○                  | ○  | -  | -  | -   | -   | -  | -          | -          | -               | ~×1/500     | ~60m                      | RT               | -          | Brain |
|                               | N1602             | Immuno-Biological Laboratories Co., Ltd. | 18741       | PoAb      | Rb          | -                  | -  | -  | -  | -   | ○   | -  | -          | ~×1/25     | ~60m            | RT          | -                         | Brain            | ○          |       |
| NeuN                          | A60               | Merck                                    | MAB377      | MoAb      | Mo          | ○                  | -  | -  | -  | -   | -   | -  | -          | ~×1/100    | O/N             | 4°C         | -                         | Nerve            | ○          |       |
|                               |                   |                                          |             | MoAb      | Mo          | ○                  | -  | -  | -  | -   | ○   | -  | -          | -          | -               | ~×1/1000    | ~60m                      | RT               | -          | Brain |
| Neurofilament                 | 2F11              | Agilent Technology                       | M076229-2   | MoAb      | Mo          | ○                  | -  | -  | -  | -   | -   | -  | -          | ~×1/50     | O/N             | 4°C         | -                         | Brain            | ○          |       |
|                               |                   |                                          |             | MoAb      | Mo          | -                  | ○  | -  | -  | -   | -   | -  | -          | -          | ~×1/100         | O/N         | 4°C                       | -                | Brain      | ○     |
|                               |                   |                                          |             | MoAb      | Mo          | -                  | ○  | -  | -  | -   | -   | -  | -          | -          | ~×1/1000        | ~60m        | RT                        | -                | Nerve      | ○     |
|                               |                   |                                          |             | MoAb      | Mo          | -                  | -  | -  | -  | -   | ○   | -  | -          | -          | ~×1/50          | O/N         | 4°C                       | -                | Eye        | ○     |
|                               |                   |                                          |             | MoAb      | Mo          | ○                  | -  | -  | -  | ○   | -   | -  | -          | -          | ~×1/100         | ~60m        | RT                        | -                | Eye        | ○     |
|                               |                   | MoAb                                     | Mo          | ○         | ○           | -                  | -  | -  | -  | -   | -   | -  | ~×1/100    | ~30m       | RT              | -           | Nerve                     | ○                |            |       |
|                               |                   | Nichirei Biosciences                     | 412551      | MoAb      | Mo          | ○                  | -  | -  | -  | -   | -   | -  | Prediluted | O/N        | 4°C             | -           | Spinal cord               | ○                |            |       |
| Neurofilament 200             | NE14              | Sigma-Aldrich                            | N5389       | MoAb      | Mo          | ○                  | -  | -  | -  | -   | -   | -  | -          | ~×1/1000   | O/N             | 4°C         | -                         | Brain            | ○          |       |
|                               |                   |                                          |             | MoAb      | Mo          | ○                  | -  | -  | -  | -   | -   | -  | -          | -          | ~×1/1000        | O/N         | 4°C                       | -                | Nerve      | ○     |
| NG2                           | -                 | Merck                                    | AB5320      | PoAb      | Rb          | ○                  | ○  | -  | -  | -   | -   | -  | -          | ~×1/200    | O/N             | 4°C         | -                         | Skin             | ○          |       |
| NGAL or Lipocalin-2/NGAL      | -                 | R&D Systems                              | AF1757      | PoAb      | Gt          | ○                  | -  | -  | -  | -   | -   | -  | -          | ~×1/25     | ~60m            | RT          | -                         | Kidney           | ○          |       |
|                               | 17                | BioPorto Diagnostics A/S                 | ABS 047-17  | MoAb      | Mo          | -                  | -  | -  | -  | ○   | -   | -  | -          | ~×1/1000   | ~60m            | RT          | -                         | Kidney           | ○          |       |
| 3-Nitrotyrosine               | 39B6              | Abcam plc                                | ab61392     | MoAb      | Mo          | ○                  | -  | -  | -  | -   | -   | -  | -          | ~×1/50     | O/N             | 4°C         | -                         | Other            | ○          |       |
| nNOS                          | -                 | Thermo Fisher Scientific                 | 61-7000     | PoAb      | Rb          | ○                  | -  | -  | -  | -   | -   | -  | -          | ~×1/100    | ~60m            | RT          | -                         | Nerve            | △          |       |
| Neuron-Specific Enolase       | -                 | MBL International                        | PD002-H     | PoAb      | Rb          | -                  | -  | -  | -  | -   | ○   | -  | -          | Prediluted | O/N             | 4°C         | -                         | Brain            | ○          |       |
| 8-OHdG                        | N45.1             | Japan Institute for the Control of Aging | MOG-020P    | MoAb      | Mo          | ○                  | -  | -  | -  | -   | -   | -  | -          | ~×1/200    | O/N             | 4°C         | -                         | Other            | △          |       |
|                               | -                 |                                          |             | PoAb      | Rb          | ○                  | -  | -  | -  | -   | -   | -  | -          | ~×1/500    | ~60m            | RT          | -                         | Spinal cord      | ○          |       |
| Olig2                         | -                 | Immuno-Biological Laboratories Co., Ltd. | 18953       | PoAb      | Rb          | ○                  | -  | -  | -  | -   | -   | -  | -          | ~×1/1000   | ~60m            | RT          | -                         | Brain            | ○          |       |
|                               | -                 |                                          |             | PoAb      | Rb          | ○                  | -  | -  | -  | -   | ○   | -  | -          | -          | ~×1/200         | ~60m        | RT                        | -                | Brain      | ○     |
|                               | -                 |                                          |             | PoAb      | Rb          | ○                  | -  | -  | -  | -   | ○   | -  | -          | -          | ~×1/200         | ~60m        | RT                        | -                | Brain      | ○     |
|                               | 211F1.1           | Merck                                    | MABN50      | MoAb      | Mo          | ○                  | -  | -  | -  | -   | ○   | -  | -          | ~×1/200    | ~60m            | RT          | -                         | Brain            | ○          |       |
|                               | -                 |                                          | AB9610      | PoAb      | Rb          | -                  | -  | -  | -  | -   | ○   | -  | -          | -          | ~×1/100         | ~60m        | RT                        | -                | Brain      | ○     |
| -                             | Novus Biologicals | NBP1-28667                               | PoAb        | Rb        | -           | ○                  | -  | -  | -  | -   | -   | -  | -          | ~×1/1000   | O/N             | 4°C         | -                         | Brain            | ○          |       |
| Osteocalcin                   | R21C-01A          | TAKARA Bio                               | M188        | MoAb      | Rt          | -                  | ○  | -  | -  | -   | -   | -  | -          | ~×1/200    | ~60m            | RT          | -                         | Bone             | ○          |       |
|                               | OCG3              | Abcam plc                                | ab13420     | MoAb      | Mo          | -                  | -  | -  | -  | -   | -   | ○  | -          | ~×1/200    | O/N             | 4°C         | -                         | Bone             | ○          |       |
| Osterix                       | -                 | Abcam plc                                | ab22552     | PoAb      | Rb          | -                  | ○  | -  | -  | -   | -   | -  | -          | ~×1/200    | O/N             | 4°C         | -                         | Bone marrow      | ○          |       |
|                               |                   |                                          |             | PoAb      | Rb          | ○                  | -  | -  | -  | -   | -   | -  | -          | -          | ~×1/200         | O/N         | 4°C                       | -                | Bone       | ○     |
|                               |                   |                                          |             | PoAb      | Rb          | ○                  | ○  | -  | -  | -   | -   | -  | -          | -          | ~×1/200         | O/N         | 4°C                       | -                | Other      | ○     |

Supplementary Table 9-2 Immunological properties of primary antibodies and their respective IHC staining conditions

| Antibody                      | Primary antibody |             |           |                          |                 |                          |                        |                 |                                                               |               |
|-------------------------------|------------------|-------------|-----------|--------------------------|-----------------|--------------------------|------------------------|-----------------|---------------------------------------------------------------|---------------|
|                               | Fixing solution  | Fixing time | Embedding | Antigen retrieval method | Solution        | Concentration/pH/reagent | Incubation temperature | Incubation time | Blocking                                                      |               |
|                               |                  |             |           | Method                   |                 |                          |                        |                 | Blocking solution                                             | Blocking time |
| MiTF                          | 10% For          | ~1w         | P         | AU                       | Citric acid BF  | -                        | 100°C<                 | ~30m            | 10% Goat Serum                                                | ~1hr          |
|                               | PFA              | ~1d         | P         | AU                       | Citric acid BF  | -                        | 100°C<                 | ~5m             | 3% H <sub>2</sub> O <sub>2</sub> /Protein Block               | ~1hr          |
| Mitochondrial Creatine Kinase | PFA              | ~1hr        | F         | Not complied             | -               | -                        | -                      | -               | 10% Goat Serum                                                | ~1hr          |
| mTOR                          | 10% For          | ~1m         | P         | AU                       | Citric acid BF  | pH6.0                    | 70~100°C               | ~60m            | BSA                                                           | ~1hr          |
| MUC-1                         | 10% For          | ~1w         | P         | AU                       | Citric acid BF  | -                        | 100°C<                 | ~30m            | 3% H <sub>2</sub> O <sub>2</sub> /Protein Block               | ~1hr          |
| MUM1protein                   | 10% For          | ~1w         | P         | AU                       | Tris BF         | -                        | 100°C<                 | ~10m            | Blocking One                                                  | ~1hr          |
| MyoD1                         | 10% For          | ~1w         | P         | AU                       | Citric acid BF  | -                        | 100°C<                 | ~30m            | 10% Goat Serum                                                | ~1hr          |
| β2-microglobulin              | 10% For          | Unknown     | P         | MW                       | Citric acid BF  | -                        | Unknown                | ~30m            | Block Ace                                                     | ~1hr          |
| Myogenin                      | 10% For          | ~1w         | P         | AU                       | Citric acid BF  | -                        | 100°C<                 | ~30m            | No information                                                | -             |
| Myoglobin                     | 10% For          | ~1w         | P         | Not complied             | -               | -                        | -                      | -               | No information                                                | -             |
|                               | 10% For          | ~1w         | P         | Not complied             | -               | -                        | -                      | -               | No information                                                | -             |
| Nephrin (c)                   | F, Sli, Ace      | ~1hr        | F         | Not complied             | -               | -                        | -                      | -               | 0.5% Casein/PBS                                               | ~1hr          |
| Nestin                        | 10% For          | 1y~         | P         | AU                       | Citric acid BF  | -                        | 100°C<                 | ~5m             | 4% Block Ace                                                  | ~1hr          |
|                               | PFA              | ~2hr        | P         | MW                       | Citric acid BF  | 0.01 M                   | 70~100°C               | ~30m            | 5% Skim milk in PBS                                           | ~1hr          |
|                               | 10% For          | ~1w         | P         | AU                       | EDTA            | -                        | 100°C<                 | ~10m            | 0.3% H <sub>2</sub> O <sub>2</sub> / Methanol / Protein Block | ~1hr          |
| NeuN                          | 10% For          | 1y~         | P         | AU                       | Citric acid BF  | -                        | 100°C<                 | ~5m             | 4% Block Ace                                                  | ~1hr          |
|                               | 10% For          | ~1d         | P         | MW                       | Citric acid BF  | 0.01 M                   | 70~100°C               | ~30m            | 5% Skim milk in PBS                                           | ~1hr          |
| Neurofilament                 | 10% For          | 1y~         | P         | AU                       | Citric acid BF  | -                        | 100°C<                 | ~5m             | 4% Block Ace                                                  | ~1hr          |
|                               | 4% Zinc For      | ~2d         | P         | MW                       | Citric acid BF  | -                        | 100°C<                 | ~30m            | -                                                             | -             |
|                               | 10% For          | ~1w         | P         | AU                       | Citric acid BF  | 0.01M                    | 100°C<                 | ~30m            | No information                                                | -             |
|                               | 10% For          | ~1w         | P         | AU                       | Tris BF         | -                        | 100°C<                 | ~10m            | Blocking One                                                  | ~1hr          |
|                               | 10% For          | ~1w         | P         | MW                       | Citric acid BF  | pH6.0                    | 100°C<                 | ~10m            | 2% BSA/PBS                                                    | ~1hr          |
|                               | 10% For          | ~1m         | P         | MW                       | Distilled water | -                        | 70~100°C               | ~5m             | -                                                             | -             |
| Neurofilament 200             | 10% For          | ~4hr        | P         | Not complied             | -               | -                        | -                      | -               | Swine serum(x500)                                             | ~1hr          |
|                               | -                | Unknown     | P         | Not complied             | -               | -                        | -                      | -               | No information                                                | -             |
|                               | 10% For          | ~1m         | P         | AU                       | Citric acid BF  | pH6.0                    | 70~100°C               | ~30m            | BSA                                                           | ~1hr          |
| NG2                           | F, Sli, 10% For  | ~1hr        | F         | Not complied             | -               | -                        | -                      | -               | Swine serum(x500)                                             | ~1hr          |
| NGAL or Lipocalin-2/NGAL      | PFA              | ~2d         | P         | AU                       | Citric acid BF  | -                        | 100°C<                 | ~10m            | 3% H <sub>2</sub> O <sub>2</sub> /Protein Block               | ~1hr          |
|                               | 10% For          | ~1w         | P         | AU                       | Citric acid BF  | -                        | 100°C<                 | ~10m            | 3% H <sub>2</sub> O <sub>2</sub> /Protein Block               | ~1hr          |
| 3-Nitrotyrosine               | 10% For          | Unknown     | P         | MW                       | Citric acid BF  | -                        | -                      | ~30m            | -                                                             | -             |
| nNOS                          | 10% For          | ~1w         | P         | Proteinase               | -               | 0.04                     | RT                     | ~10m            | Goat Serum                                                    | ~1hr          |
| Neuron-Specific Enolase       | 10% For          | ~1w         | P         | AU                       | Citric acid BF  | -                        | 100°C<                 | ~10m            | Blocking One                                                  | ~1hr          |
| 8-OHdG                        | Bo               | ~O/N        | P         | Not complied             | -               | -                        | -                      | -               | Rabbit serum                                                  | ~1hr          |
| Olig2                         | 10% For          | ~1w         | P         | MW                       | Citric acid BF  | -                        | 70~100°C               | ~30m            | Block Ace                                                     | ~1hr          |
|                               | 10% For          | ~1w         | P         | MW                       | Citric acid BF  | -                        | 70~100°C               | ~30m            | Block Ace                                                     | ~1hr          |
|                               | 10% For          | ~1d         | P         | MW                       | Citric acid BF  | 0.01 M                   | 70~100°C               | ~30m            | 5% Skim milk in PBS                                           | ~1hr          |
|                               | 10% For          | ~1d         | P         | MW                       | Citric acid BF  | 0.01 M                   | 70~100°C               | ~30m            | 5% Skim milk in PBS                                           | ~1hr          |
|                               | 10% For          | ~1w         | P         | AU                       | Citric acid BF  | -                        | 100°C<                 | ~10m            | 0.3% H <sub>2</sub> O <sub>2</sub> / Methanol / Protein Block | ~1hr          |
|                               | 10% For          | ~1d         | P         | MW                       | Immunosaver     | -                        | 100°C<                 | ~10m            | No information                                                | -             |
| Osteocalcin                   | 10% For          | ~1w         | P         | Proteinase               | -               | -                        | RT                     | ~10m            | -                                                             | -             |
| Osteoclatin                   | 10% For          | ~1w         | P         | Proteinase               | -               | -                        | 37°C                   | ~5m             | Blocking One                                                  | ~1hr          |
| Osterix                       | 10% For          | 1y~         | P         | AU                       | Citric acid BF  | -                        | 100°C<                 | ~5m             | 4% Block Ace                                                  | ~1hr          |
|                               | 10% For          | ~O/N        | P         | Boil                     | Citric acid BF  | 10mM pH6.0               | 70~100°C               | ~60m            | Skim milk                                                     | ~1hr          |
| Sp7/Osterix                   | 10% For          | Unknown     | P         | Proteinase K             | -               | -                        | -                      | -               | -                                                             | -             |

Supplementary Table 9-3 Immunological properties of primary antibodies and their respective IHC staining conditions

| Primary antibody              | Secondary antibody                                                                                                                      |  |                          |             |                 |             |                                                        | Supplementary information | Figure No.                                               |                 |
|-------------------------------|-----------------------------------------------------------------------------------------------------------------------------------------|--|--------------------------|-------------|-----------------|-------------|--------------------------------------------------------|---------------------------|----------------------------------------------------------|-----------------|
| Antibody                      | Secondary antibody information                                                                                                          |  | Supplier                 | Catalog No. | Incubation time | Temperature | Reagent                                                |                           |                                                          | Incubation time |
|                               | Product                                                                                                                                 |  |                          |             |                 |             |                                                        |                           |                                                          |                 |
| MitF                          | EnVision+/HRP, Mouse                                                                                                                    |  | Agilent Technology       | -           | ~30m            | RT          | DAB                                                    | ~3m                       | 94                                                       |                 |
|                               | Envision+ / HRP, RUO Mouse                                                                                                              |  | Agilent Technology       | K4001       | ~30m            | RT          | DAB                                                    | ~10m                      |                                                          |                 |
| Mitochondrial Creatine Kinase | Histofine                                                                                                                               |  | Nichirei                 | -           | ~30m            | RT          | DAB                                                    | ~3m                       | -                                                        |                 |
| mTOR                          | Polyclonal Goat Anti-Rabbit Immunoglobulins and Streptavidin/HRP with Tyramide (RENAISSANCE® TSATM BIOTIN SYSTEM: PerkinElmer, NEL700A) |  | Agilent Technology       | E0432/P0397 | ~30m            | RT          | DAB                                                    | ~10m                      | -                                                        |                 |
| MUC-1                         | Envision+ / HRP, RUO Rabbit                                                                                                             |  | Agilent Technology       | K4003       | ~30m            | RT          | DAB                                                    | ~1m                       | -                                                        |                 |
| MUM1protein                   | Histofine Simple Stain MAX-PO(MULTI)                                                                                                    |  | Nichirei                 | 424154      | ~30m            | 37°C        | DAB                                                    | ~3m                       | -                                                        |                 |
| MyoD1                         | EnVision+/HRP, Mouse                                                                                                                    |  | Agilent Technology       | -           | ~30m            | RT          | DAB                                                    | ~3m                       | 95                                                       |                 |
| β2-microglobulin              | Histofine Simple Stain Rat MAX-PO(MULTI)                                                                                                |  | Nichirei                 | 414191      | ~30m            | RT          | DAB                                                    | ~3m                       |                                                          |                 |
| Myogenin                      | VECTASTAIN Elite ABC Kit(mouse IgG)                                                                                                     |  | Vector Laboratories      | BA-2001     | ~30m            | RT          | DAB                                                    | ~5m                       | 96                                                       |                 |
| Myoglobin                     | Histofine Simple Stain Mouse MAX-PO(R) (Histo Stainer)                                                                                  |  | Nichirei                 | 714341      | ~30m            | RT          | DAB                                                    | ~10m                      |                                                          |                 |
|                               | Histofine Simple Stain Rat MAX-PO(MULTI) (Histo Stainer)                                                                                |  | Nichirei                 | 714191      | ~30m            | RT          | DAB                                                    | ~10m                      |                                                          |                 |
| Nephrin (c)                   | Swine anti-rabbit immunoglobulins/FITC (affinity isolated)                                                                              |  | Agilent Technology       | F0205       | ~60m            | RT          | FITC                                                   | No information            | 97                                                       |                 |
| Nestin                        | EnVision+/HRP, Mouse                                                                                                                    |  | Agilent Technology       | -           | ~30m            | 37°C        | DAB                                                    | ~3m                       | 98                                                       |                 |
|                               | Histofine Simple Stain Rat MAX-PO(M)                                                                                                    |  | Nichirei                 | 414171      | ~60m            | RT          | DAB                                                    | ~10m                      |                                                          |                 |
|                               | Envision+ / HRP, RUO Rabbit                                                                                                             |  | Agilent Technology       | K4003       | ~30m            | RT          | DAB                                                    | ~10m                      |                                                          |                 |
| NeuN                          | EnVision+/HRP, Mouse                                                                                                                    |  | Agilent Technology       | -           | ~30m            | 37°C        | DAB                                                    | ~3m                       | 99                                                       |                 |
|                               | Histofine Simple Stain Rat MAX-PO(M)                                                                                                    |  | Nichirei                 | 414171      | ~60m            | RT          | DAB                                                    | ~10m                      |                                                          |                 |
| Neurofilament                 | EnVision+/HRP, Mouse                                                                                                                    |  | Agilent Technology       | -           | ~30m            | 37°C        | DAB                                                    | ~3m                       | 100                                                      |                 |
|                               | EnVision+ Dual Link, Single Reagents, HRP                                                                                               |  | Agilent Technology       | K4063       | ~30m            | RT          | DAB                                                    | ~3m                       |                                                          |                 |
|                               | Rabbit Anti-Mouse Immunoglobulins/Biotine - Rabbit F(ab)2 (affinity isolated)                                                           |  | Agilent Technology       | E0413       | ~30m            | RT          | DAB                                                    | ~5m                       |                                                          |                 |
|                               | Histofine Simple Stain MAX-PO(MULTI)                                                                                                    |  | Nichirei                 | 424154      | ~30m            | 37°C        | DAB                                                    | ~3m                       |                                                          |                 |
|                               | Histofine Simple Stain Rat MAX-PO(MULTI) (Histo Stainer)                                                                                |  | Nichirei                 | 714191      | ~30m            | RT          | DAB                                                    | ~10m                      |                                                          |                 |
|                               | Histofine Simple Stain Rat MAX-PO(M) (Histo Stainer)                                                                                    |  | Nichirei                 | 714171      | ~30m            | RT          | DAB                                                    | ~5m                       |                                                          |                 |
| Neurofilament 200             | Histofine Simple Stain Rat MAX-PO(M)                                                                                                    |  | Nichirei                 | 414171      | ~30m            | 37°C        | DAB                                                    | ~10m                      | 101                                                      |                 |
|                               | VECTASTAIN Elite ABC Kit(mouse IgG)                                                                                                     |  | Vector Laboratories      | PK-6102     | ~30m            | RT          | DAB                                                    | ~5m                       |                                                          |                 |
| NG2                           | Polyclonal Rabbit Anti-Mouse Immunoglobulins and Streptavidin/HRP with Tyramide (RENAISSANCE® TSATM BIOTIN SYSTEM: PerkinElmer,         |  | Agilent Technology       | E0464/P0397 | ~30m            | RT          | DAB                                                    | ~10m                      | 102                                                      |                 |
|                               | Rabbit IgG (H+L), Alexa488                                                                                                              |  | -                        | A11008      | ~30m            | 37°C        | Other                                                  | No information            |                                                          |                 |
| NGAL or Lipocalin-2/NGAL      | Histofine Simple Stain Rat MAX-PO(G)                                                                                                    |  | Nichirei                 | 414331      | ~60m            | RT          | DAB                                                    | ~3m                       | -                                                        |                 |
|                               | Envision+ / HRP, RUO Mouse                                                                                                              |  | Agilent Technology       | K4001       | ~60m            | RT          | DAB                                                    | ~3m                       |                                                          |                 |
| 3-Nitrotyrosine               | Histofine Simple Stain Rat MAX-PO(M)                                                                                                    |  | Nichirei                 | 414171      | ~30m            | RT          | DAB                                                    | No information            | Soaked in acetone for 15 minutes after deparaffinization |                 |
| nNOS                          | Histofine Simple Stain Rat MAX-PO(M)                                                                                                    |  | Nichirei                 | 414171      | ~30m            | RT          | DAB                                                    | ~5m                       | 103                                                      |                 |
| Neuron-Specific Enolase       | Histofine Simple Stain MAX-PO(MULTI)                                                                                                    |  | Nichirei                 | 424154      | ~30m            | 37°C        | DAB                                                    | ~3m                       | -                                                        |                 |
| 8-OHdG                        | Histofine SAB-AP(M)                                                                                                                     |  | Nichirei                 | 414022      | ~10m            | RT          | DAB                                                    | ~5m                       | 104                                                      |                 |
|                               | Histofine Simple Stain Rat MAX-PO(MULTI)                                                                                                |  | Nichirei                 | 414191      | ~30m            | RT          | -                                                      | No information            |                                                          |                 |
| Olig2                         | Fluorophore labeled immunoglobulin                                                                                                      |  | Thermo Fisher Scientific | A-21430     | ~30m            | RT          | DAPI (H-1200, VECTOR)<br>(VECTASHIELD Mounting Medium) | Unknown                   | -                                                        |                 |
|                               | Histofine Simple Stain Rat MAX-PO(M)                                                                                                    |  | Nichirei                 | 414171      | ~60m            | RT          | DAB                                                    | ~10m                      | 105                                                      |                 |
|                               | Histofine Simple Stain Rat MAX-PO(M)                                                                                                    |  | Nichirei                 | 414171      | ~60m            | RT          | DAB                                                    | ~10m                      |                                                          |                 |
|                               | Envision+ / HRP, RUO Rabbit                                                                                                             |  | Agilent Technology       | K4003       | ~30m            | RT          | DAB                                                    | ~3m                       | 106                                                      |                 |
|                               | Histofine Simple Stain Mouse MAX-PO(R)                                                                                                  |  | Nichirei                 | 414341      | ~30m            | RT          | DAB                                                    | ~20s                      |                                                          |                 |
| Osteocalcin                   | Histofine Simple Stain Mouse MAX-PO(Rat)                                                                                                |  | Nichirei                 | 414311      | ~30m            | RT          | DAB                                                    | ~10m                      | -                                                        |                 |
| Osteoclatin                   | Histofine Simple Stain MAX-PO(MULTI)                                                                                                    |  | Nichirei                 | 424154      | ~30m            | 37°C        | DAB                                                    | ~3m                       | -                                                        |                 |
| Osterix                       | EnVision+/HRP, Rabbit                                                                                                                   |  | Agilent Technology       | -           | ~30m            | 37°C        | DAB                                                    | ~3m                       | -                                                        |                 |
|                               | EnVision+/HRP, Rabbit                                                                                                                   |  | Agilent Technology       | -           | ~60m            | RT          | DAB                                                    | ~5m                       |                                                          |                 |
| Sp7/Osterix                   | Histofine Simple Stain Rat MAX-PO(MULTI)                                                                                                |  | Nichirei                 | 414191      | -               | -           | -                                                      | No information            | 108                                                      |                 |

Supplementary Table 10-1 Immunological properties of primary antibodies and their respective IHC staining conditions

|                         |             | Primary antibody               |              |           |             |                    |    |    |    |     |     |         |         |          |           |                 |             |                              |                  |              |   |
|-------------------------|-------------|--------------------------------|--------------|-----------|-------------|--------------------|----|----|----|-----|-----|---------|---------|----------|-----------|-----------------|-------------|------------------------------|------------------|--------------|---|
|                         |             | Antibody                       |              |           |             | Species reactivity |    |    |    |     |     |         |         |          | Dilution  | Incubation time | Temperature | Supplementary information    | Positive control | Reactivity   |   |
| Antigen                 | Clone       | Supplier                       | Catalog No.  | Clonality | Host animal | Rt                 | Mo | Rb | GP | Pri | Dog | Sw      | Other   |          |           |                 |             |                              |                  |              |   |
| p40                     |             | Diagnostic Biosystems          | RP163-05     | PoAb      | Rb          | ○                  | -  | -  | -  | -   | -   | -       | -       | ~×1/100  | O/N       | RT              | -           | Kidney                       | ○                |              |   |
|                         |             |                                |              | PoAb      | Rb          | -                  | ○  | -  | -  | -   | -   | -       | -       | -        | -         | ~×1/100         | O/N         | RT                           | -                | Kidney       | ○ |
| p53                     | DO-1        | Bio-Rad Laboratories, Inc.     | MCA1701      | MoAb      | Mo          | -                  | -  | -  | -  | -   | ○   | -       | -       | ~×1/25   | O/N       | 4°C             | -           | Intestine                    | ○                |              |   |
|                         | CM5         | Leica Biosystems               | NCL-p53-CM5p | PoAb      | Rb          | ○                  | ○  | -  | -  | -   | -   | -       | -       | ~×1/1000 | O/N       | 4°C             | -           | Spleen                       | ○                |              |   |
| p62/SQSTM1              |             | MBL International              | PM045        | PoAb      | Rb          | ○                  | ○  | -  | -  | -   | -   | -       | -       | ~×1/1000 | O/N       | 4°C             | -           | Other                        | ○                |              |   |
|                         |             | Abcam plc                      | ab56416      | MoAb      | Mo          | ○                  | ○  | -  | -  | -   | ○   | -       | -       | ~×1/200  | ~60m      | RT              | -           | Kidney                       | ○                |              |   |
| p63                     | 4A4         | Abcam plc                      | ab735        | MoAb      | Mo          | ○                  | -  | -  | -  | -   | -   | -       | -       | ~×1/200  | O/N       | 4°C             | -           | Prostate                     | ○                |              |   |
|                         | 4A4         | GeneTex                        | GTX23239     | MoAb      | Mo          | -                  | -  | -  | -  | -   | ○   | -       | -       | ~×1/200  | O/N       | 4°C             | -           | Mammary gland                | ○                |              |   |
| Paraoxonase 2 (PON2)    | -           | Abcam plc                      | ab40969      | PoAb      | Rb          | ○                  | ○  | -  | -  | -   | ○   | -       | -       | ~×1/1000 | O/N       | 4°C             | -           | Other                        | ○                |              |   |
| Parathyroid Hormone     | -           | Yanaihara                      | Y421         | PoAb      | Rb          | ○                  | -  | -  | -  | -   | -   | -       | -       | ~×1/50   | ~60m      | RT              | -           | Thyroid                      | -                |              |   |
| Pax-5                   | DAK-Pax5    | Agilent Technology             | M730701-2    | MoAb      | Mo          | -                  | -  | -  | -  | -   | ○   | -       | -       | ~×1/25   | O/N       | 4°C             | -           | Lymph node                   | ○                |              |   |
|                         | -           | Abcam plc                      | ab15164      | PoAb      | Rb          | -                  | -  | -  | -  | -   | ○   | -       | -       | ~×1/50   | O/N       | 4°C             | -           | Lymph node                   | ○                |              |   |
| Pax-6                   | -           | Biologend                      | PRB-278P     | PoAb      | Rb          | ○                  | -  | -  | -  | -   | -   | -       | -       | ~×1/1000 | ~60m      | RT              | -           | Eye                          | ○                |              |   |
| PCNA                    | PC10        | Agilent Technology             | M087901-2    | MoAb      | Mo          | ○                  | ○  | -  | -  | -   | -   | -       | -       | ~×1/1000 | O/N       | 4°C             | -           | Liver                        | ○                |              |   |
|                         |             |                                |              | MoAb      | Mo          | ○                  | -  | -  | -  | -   | -   | -       | -       | -        | ~×1/500   | O/N             | 4°C         | -                            | Intestine        | ○            |   |
|                         |             |                                |              | MoAb      | Mo          | ○                  | -  | -  | -  | -   | -   | -       | -       | -        | ~×1/500   | ~60m            | RT          | -                            | Intestine        | ○            |   |
|                         |             |                                |              | MoAb      | Mo          | ○                  | -  | -  | -  | -   | ○   | -       | -       | -        | ~×1/1000  | ~60m            | RT          | -                            | Intestine        | ○            |   |
|                         |             |                                |              | MoAb      | Mo          | ○                  | ○  | -  | -  | -   | -   | -       | -       | -        | ~×1/200   | ~30m            | RT          | -                            | Liver            | ○            |   |
|                         |             |                                |              | MoAb      | Mo          | ○                  | ○  | -  | -  | -   | ○   | -       | -       | -        | ~×1/100   | ~30m            | 4°C         | -                            | Other            | ○            |   |
|                         |             |                                |              | MoAb      | Mo          | -                  | ○  | -  | -  | -   | -   | -       | -       | -        | Zebrafish | ~×1/200         | ~60m        | RT                           | -                | Intestine    | ○ |
|                         |             |                                |              | MoAb      | Mo          | ○                  | -  | -  | -  | -   | -   | -       | -       | -        | Zebrafish | ~×1/200         | ~60m        | RT                           | -                | Intestine    | ○ |
|                         |             |                                |              | MoAb      | Mo          | -                  | -  | -  | -  | -   | ○   | -       | -       | -        | -         | ~×1/200         | O/N         | 4°C                          | -                | Tumor tissue | ○ |
|                         |             |                                |              | MoAb      | Mo          | ○                  | -  | ○  | -  | -   | -   | -       | -       | -        | -         | ~×1/500         | ~60m        | RT                           | -                | Eye          | ○ |
|                         |             |                                |              | MoAb      | Mo          | ○                  | -  | -  | -  | -   | -   | -       | -       | -        | -         | ~×1/1000        | ~60m        | RT                           | -                | Liver        | ○ |
|                         |             |                                |              | MoAb      | Mo          | -                  | -  | -  | -  | -   | -   | -       | -       | ○        | -         | ~×1/200         | O/N         | 4°C                          | -                | Intestine    | △ |
|                         |             |                                |              | MoAb      | Mo          | ○                  | -  | -  | -  | -   | -   | -       | -       | -        | -         | ~×1/200         | O/N         | 4°C                          | -                | Other        | ○ |
|                         |             |                                |              | MoAb      | Mo          | ○                  | -  | -  | -  | -   | -   | -       | -       | -        | -         | ~×1/500         | ~60m        | RT                           | -                | Ovary        | ○ |
|                         |             |                                |              | MoAb      | Mo          | ○                  | ○  | -  | -  | -   | -   | -       | -       | -        | -         | ~×1/1000        | ~60m        | RT                           | -                | Liver        | ○ |
|                         |             |                                |              | PoAb      | Mo          | ○                  | -  | -  | -  | -   | -   | -       | -       | -        | -         | ~×1/200         | ~60m        | 37°C                         | -                | Brain        | ○ |
| PoAb                    | Mo          | ○                              | -            | -         | -           | -                  | -  | -  | -  | -   | -   | ~×1/100 | ~60m    | RT       | -         | Liver           | ○           |                              |                  |              |   |
| PDX1                    | -           | Trans Genic                    | KR059        | PoAb      | Rb          | ○                  | -  | -  | -  | -   | -   | -       | -       | ~×1/100  | O/N       | 4°C             | -           | Pancreas                     | ○                |              |   |
| Perilipin 1             | -           | Progen                         | GP29         | PoAb      | GP          | ○                  | -  | -  | -  | -   | -   | -       | -       | ~×1/1000 | O/N       | 4°C             | -           | Mammary                      | ○                |              |   |
| PGP-9.5                 |             | Agilent Technology             | Z511601-2    | PoAb      | Rb          | ○                  | ○  | -  | -  | -   | ○   | -       | Cat     | ~×1/200  | ~60m      | RT              | -           | Nerve                        | ○                |              |   |
|                         |             |                                |              | PoAb      | Rb          | ○                  | -  | -  | -  | -   | -   | -       | -       | -        | ~×1/25    | O/N             | 4°C         | -                            | Nerve            | ○            |   |
|                         | 13C4/13C4   | Abcam plc                      | ab8189       | MoAb      | Mo          | ○                  | ○  | -  | ○  | -   | ○   | -       | -       | ~×1/100  | O/N       | 4°C             | -           | Other                        | ○                |              |   |
|                         |             |                                |              | MoAb      | Mo          | -                  | -  | -  | -  | ○   | -   | -       | ~×1/500 | O/N      | 4°C       | -               | Nerve       | ○                            |                  |              |   |
| Phospho-Histone H3      | -           | Cell Signaling Technology      | 9701         | PoAb      | Rb          | ○                  | ○  | -  | -  | -   | -   | -       | -       | ~×1/200  | O/N       | 4°C             | -           | Placenta                     | ○                |              |   |
| Phospho-Histone H2A.X   | Ser139/20E3 | Cell Signaling Technology      | 9718         | MoAb      | Rb          | ○                  | -  | -  | -  | -   | -   | -       | -       | ~×1/100  | O/N       | 4°C             | -           | Liver                        | ○                |              |   |
| PMP70                   | -           | Abcam plc                      | ab3421       | PoAb      | Rb          | ○                  | -  | -  | -  | -   | -   | -       | -       | ~×1/1000 | ~30m      | RT              | -           | Liver                        | ○                |              |   |
| Pneumocystis            | -           | Santa Cruz Biotechnology, Inc. | sc-71915     | MoAb      | Mo          | -                  | -  | -  | -  | -   | -   | -       | ○       | ~×1/100  | O/N       | 4°C             | -           | Pneumocystis infected tissue | ○                |              |   |
| Podoplanin              | HG-19       | AngioBio, Inc.                 | 11-035       | MoAb      | Mo          | ○                  | -  | -  | -  | -   | -   | -       | -       | ~×1/500  | O/N       | 4°C             | -           | Liver                        | ○                |              |   |
|                         |             | SIGMA                          | P1995        | PoAb      | Rb          | ○                  | -  | -  | -  | -   | -   | -       | -       | ~×1/1600 | ~60m      | RT              | -           | Other                        | ○                |              |   |
| Prosurfactant Protein C |             | Abcam plc                      | ab90716      | PoAb      | Rb          | -                  | ○  | -  | -  | -   | -   | -       | -       | ~×1/500  | O/N       | 4°C             | -           | Lung                         | ○                |              |   |
|                         |             |                                |              | PoAb      | Rb          | ○                  | -  | -  | -  | -   | -   | -       | -       | -        | ~×1/1000  | O/N             | 4°C         | -                            | Lung             | ○            |   |
| Progesteron Receptor    | 16          | Leica Biosystems               | NCL-PGR-312  | MoAb      | Mo          | ○                  | -  | -  | -  | -   | -   | -       | -       | ~×1/500  | O/N       | 4°C             | -           | Other                        | ○                |              |   |

Supplementary Table 10-2 Immunological properties of primary antibodies and their respective IHC staining conditions

| Antibody                | Primary antibody |             |           |                          |                |                 |                          |                        |                 |                                                              |               |
|-------------------------|------------------|-------------|-----------|--------------------------|----------------|-----------------|--------------------------|------------------------|-----------------|--------------------------------------------------------------|---------------|
|                         | Fixing solution  | Fixing time | Embedding | Antigen retrieval method |                | Solution        | Concentration/pH/reagent | Incubation temperature | Incubation time | Blocking                                                     |               |
|                         |                  |             |           | Method                   |                |                 |                          |                        |                 | Blocking solution                                            | Blocking time |
| p40                     | 10% For          | ~60m        | P         | PC                       |                | Citric acid BF  | -                        | 100°C<                 | ~10m            | Goat Serum                                                   | ~1hr          |
|                         | 10% For          | ~60m        | P         | PC                       |                | Citric acid BF  | -                        | 100°C<                 | ~10m            | Goat Serum                                                   | ~1hr          |
| p53                     | 10% For          | ~1w         | P         | AU                       |                | Citric acid BF  | -                        | 100°C<                 | ~10m            | Blocking One                                                 | ~1hr          |
|                         | 10% For          | Unknown     | P         | MW                       |                | Citric acid BF  | -                        | -                      | ~30m            | -                                                            | -             |
| p62/SQSTM1              | 10% For          | Unknown     | P         | MW                       |                | HistoVT One     | -                        | -                      | ~30m            | -                                                            | -             |
|                         | PFA              | ~2d         | P         | AU                       |                | Citric acid BF  | -                        | 100°C<                 | ~10m            | 3% H <sub>2</sub> O <sub>2</sub> /Protein Block              | ~1hr          |
| p63                     | 10% For          | ~O/N        | P         | PC                       |                | Citric acid BF  | -                        | 70~100°C               | ~10m            | VECTASTAIN Elite ABC Kit(mouse)                              | -             |
|                         | 10% For          | ~1w         | P         | AU                       |                | Citric acid BF  | -                        | 100°C<                 | ~30m            | 10% Goat Serum                                               | ~1hr          |
| Paraoxonase 2 (PON2)    | 10% For          | Unknown     | P         | MW                       |                | HistoVT One     | -                        | -                      | ~30m            | -                                                            | -             |
| Parathyroid Hormone     | Unknown          | Unknown     | P         | Boil                     |                | Citric acid BF  | -                        | 70~100°C               | ~30m            | No information                                               | -             |
| Pax-5                   | 10% For          | ~1w         | P         | AU                       |                | Citric acid BF  | -                        | 100°C<                 | ~10m            | Blocking One                                                 | ~1hr          |
|                         | 10% For          | ~1w         | P         | AU                       |                | Citric acid BF  | -                        | 100°C<                 | ~30m            | 10% Goat Serum                                               | ~1hr          |
| Pax-6                   | PFA              | ~1d         | P         | MW                       |                | EDTA            | -                        | 70~100°C               | ~10m            | 3% H <sub>2</sub> O <sub>2</sub> /Rabbit serum/Protein Block | ~1hr          |
| PCNA                    | 10% For          | 1y~         | P         | MW                       |                | Citric acid BF  | -                        | 70~100°C               | ~5m             | 4% Block Ace                                                 | ~1hr          |
|                         | 10% For          | ~1m         | P         | PC                       |                | Tris BF         | -                        | 100°C<                 | ~30m            | Casein                                                       | O/N           |
|                         | 10% For          | ~1w         | P         | Boil                     |                | Distilled water | -                        | 70~100°C               | ~30m            | No information                                               | -             |
|                         | 10% For          | ~1d         | P         | MW                       |                | Citric acid BF  | 0.01 M                   | 70~100°C               | ~30m            | 5% Skim milk in PBS                                          | ~1hr          |
|                         | 10% For          | ~1y         | P         | MW                       |                | Distilled water | -                        | 70~100°C               | ~5m             | -                                                            | -             |
|                         | 10% For          | Unknown     | P         | MW                       |                | Citric acid BF  | -                        | -                      | ~30m            | -                                                            | -             |
|                         | 10% For          | ~1m         | P         | AU or MW                 |                | Citric acid BF  | pH6.0                    | 100°C<                 | ~30m            | Goat Serum                                                   | ~1hr          |
|                         | 10% For          | ~1m         | P         | AU or MW                 |                | Citric acid BF  | pH6.0                    | 100°C<                 | ~30m            | Goat Serum                                                   | ~1hr          |
|                         | 10% For          | ~1w         | P         | AU                       |                | Tris BF         | -                        | 100°C<                 | ~10m            | Blocking One                                                 | ~1hr          |
|                         | 10% For          | ~1w         | P         | MW                       |                | Distilled water | -                        | 100°C<                 | ~10m            | 2% BSA/PBS                                                   | ~1hr          |
|                         | 10% For          | ~1y         | P         | PC                       |                | Citric acid BF  | -                        | 100°C<                 | ~5m             | Skim milk                                                    | ~1hr          |
|                         | 10% For          | ~2d         | P         | AU                       |                | Citric acid BF  | pH6.0                    | 70~100°C               | ~60m            | BSA                                                          | ~1hr          |
|                         | DA               | Unknown     | P         | MW                       |                | Citric acid BF  | -                        | Unknown                | ~30m            | Block Ace                                                    | ~1hr          |
|                         | 10% For          | ~1w         | P         | MW                       |                | Citric acid BF  | 0.01M                    | 70~100°C               | ~30m            | No information                                               | -             |
|                         | 10% For          | ~O/N        | P         | MW                       |                | Citric acid BF  | -                        | 70~100°C               | ~30m            | No information                                               | -             |
|                         | 10% For          | ~1d         | P         | Boil                     |                | Citric acid BF  | -                        | 70~100°C               | ~30m            | No information                                               | -             |
| 10% For                 | ~1d              | P           | MW        |                          | Citric acid BF | -               | 70~100°C                 | ~30m                   | Block Ace       | ~1hr                                                         |               |
| PDX1                    | 10% For          | ~O/N        | P         | PC                       |                | Citric acid BF  | -                        | 70~100°C               | ~10m            | VECTASTAIN Elite ABC Kit(rabbit)                             | 30min         |
| Perilipin 1             | 10% For          | ~1w         | P         | AU                       |                | Citric acid BF  | -                        | 100°C<                 | ~30m            | No information                                               | -             |
| PGP-9.5                 | 10% For          | ~O/N        | P         | Not complied             |                | -               | -                        | -                      | -               | Goat Serum                                                   | ~1hr          |
|                         | 10% For          | ~1m         | P         | AU                       |                | Citric acid BF  | pH6.0                    | 70~100°C               | ~30m            | BSA                                                          | ~1hr          |
|                         | 10% For          | Unknown     | P         | MW                       |                | HistoVT One     | -                        | -                      | ~30m            | -                                                            | -             |
|                         | 10% For          | ~O/N        | P         | Boil                     |                | Citric acid BF  | 10mM pH6.0               | 70~100°C               | ~60m            | Skim milk                                                    | ~1hr          |
| Phospho-Histone H3      | 10% For          | ~O/N        | P         | PC                       |                | Citric acid BF  | -                        | 70~100°C               | ~10m            | VECTASTAIN Elite ABC Kit(rabbit)                             | 30min         |
| Phospho-Histone H2A.X   | 10% For          | ~O/N        | P         | PC                       |                | Citric acid BF  | -                        | 70~100°C               | ~10m            | VECTASTAIN Elite ABC Kit(rabbit)                             | 30min         |
| PMP70                   | 10% For          | ~1w         | P         | Boil                     |                | Tris BF         | -                        | 70~100°C               | ~10m            | No information                                               | -             |
| Pneumocystis            | 10% For          | ~1w         | P         | AU                       |                | Citric acid BF  | -                        | 100°C<                 | ~10m            | Blocking One                                                 | ~1hr          |
| Podoplanin              | 10% For          | ~1m         | P         | PC                       |                | Citric acid BF  | -                        | 100°C<                 | ~30m            | Casein                                                       | O/N           |
|                         | 10% For          | ~1m         | P         | Pepsin                   |                | -               | -                        | 37°C                   | ~30m            | Goat Serum                                                   | ~1hr          |
| Prosurfactant Protein C | 10% For          | ~1w         | P         | MW                       |                | EDTA            | 1mM                      | 100°C<                 | ~30m            | 2.5% Normal serum                                            | ~1hr          |
|                         | 10% For          | ~1w         | P         | AU                       |                | Citric acid BF  | -                        | 100°C<                 | ~30m            | No information                                               | -             |
| Progesteron Receptor    | 10% For          | Unknown     | P         | MW                       |                | Citric acid BF  | -                        | -                      | ~30m            | -                                                            | -             |

Supplementary Table 10-3 Immunological properties of primary antibodies and their respective IHC staining conditions

| Primary antibody                         | Secondary antibody                                                                                                                                                                             |                     |                  |                 |             |                 |                 | Supplementary information | Figure No. |
|------------------------------------------|------------------------------------------------------------------------------------------------------------------------------------------------------------------------------------------------|---------------------|------------------|-----------------|-------------|-----------------|-----------------|---------------------------|------------|
| Antibody                                 | Secondary antibody information                                                                                                                                                                 | Supplier            | Catalog No.      | Incubation time | Temperature | Reagent         | Incubation time |                           |            |
|                                          | Product                                                                                                                                                                                        |                     |                  |                 |             |                 |                 |                           |            |
| p40                                      | Histofine Simple Stain Rat MAX-PO(R)                                                                                                                                                           | Nichirei            | 414181           | ~30m            | RT          | DAB             | ~5m             | -                         |            |
|                                          | Histofine Simple Stain Mouse MAX-PO(R)                                                                                                                                                         | Nichirei            | 414341           | ~30m            | RT          | DAB             | ~5m             | -                         |            |
| p53                                      | Histofine Simple Stain MAX-PO(MULTI)                                                                                                                                                           | Nichirei            | 424154           | ~30m            | 37°C        | DAB             | ~3m             | -                         |            |
|                                          | -                                                                                                                                                                                              | -                   | -                | -               | -           | -               | No information  | -                         |            |
| p62/SQSTM1                               | Histofine Simple Stain Rat MAX-PO(R)                                                                                                                                                           | Nichirei            | 414181           | -               | -           | -               | No information  | -                         |            |
|                                          | Histofine Simple Stain Rat MAX-PO(M)                                                                                                                                                           | Nichirei            | 414171           | ~60m            | RT          | DAB             | ~3m             | -                         |            |
| p63                                      | VECTASTAIN Elite ABC Kit(mouse IgG)                                                                                                                                                            | Vector Laboratories | PK-6102          | ~30m            | RT          | DAB             | ~3m             | -                         |            |
|                                          | EnVision+/HRP, Mouse                                                                                                                                                                           | Agilent Technology  | -                | ~30m            | RT          | DAB             | ~3m             | -                         |            |
| Paraoxonase 2 (PON2)                     | Histofine Simple Stain Rat MAX-PO(R)                                                                                                                                                           | Nichirei            | 414181           | -               | -           | -               | No information  | -                         |            |
| Parathyroid Hormone                      | Histofine Simple Stain Rat MAX-PO(MULTI)                                                                                                                                                       | Nichirei            | 414191           | ~30m            | RT          | DAB             | ~10m            | -                         |            |
| Pax-5                                    | Histofine Simple Stain MAX-PO(MULTI)                                                                                                                                                           | Nichirei            | 424154           | ~30m            | 37°C        | DAB             | ~3m             | -                         |            |
|                                          | EnVision+/HRP, Rabbit                                                                                                                                                                          | Agilent Technology  | -                | ~30m            | RT          | DAB             | ~3m             | -                         | 109        |
| Pax-6                                    | Anti rabbit IgG Goat/Biotinylated                                                                                                                                                              | Agilent Technology  | E0432            | ~30m            | RT          | DAB             | ~1m             | -                         |            |
| PCNA                                     | EnVision+/HRP, Mouse                                                                                                                                                                           | Agilent Technology  | -                | ~30m            | 37°C        | DAB             | ~3m             | -                         |            |
|                                          | EnVision+ Dual Link, Single Reagents, HRP                                                                                                                                                      | Agilent Technology  | K4063            | ~30m            | RT          | DAB             | ~3m             | -                         | 110        |
|                                          | Rabbit Anti-Mouse Immunoglobulins/Biotine - Rabbit F(ab)2 (affinity isolated)                                                                                                                  | Agilent Technology  | E0413            | ~30m            | RT          | DAB             | ~5m             | -                         |            |
|                                          | Histofine Simple Stain Rat MAX-PO(M)                                                                                                                                                           | Nichirei            | 414171           | ~60m            | RT          | DAB             | ~10m            | -                         |            |
|                                          | Histofine Simple Stain Rat MAX-PO(M)                                                                                                                                                           | Nichirei            | 414171           | ~30m            | RT          | DAB             | ~5m             | -                         |            |
|                                          | -                                                                                                                                                                                              | -                   | -                | -               | -           | -               | No information  | -                         |            |
|                                          | Histofine MOUSESTAIN KIT                                                                                                                                                                       | Nichirei            | 414321F          | ~30m            | RT          | DAB             | ~1m             | -                         |            |
|                                          | Histofine Simple Stain Rat MAX PO (MULTI)                                                                                                                                                      | Nichirei            | 414191F          | ~30m            | RT          | DAB             | ~1m             | -                         |            |
|                                          | Histofine Simple Stain MAX-PO(MULTI)                                                                                                                                                           | Nichirei            | 424154           | ~30m            | 37°C        | DAB             | ~3m             | -                         |            |
|                                          | Histofine Simple Stain Rat MAX-PO(R) (Histo Stainer)                                                                                                                                           | Nichirei            | 714191           | ~30m            | RT          | DAB             | ~10m            | -                         |            |
|                                          | Histofine SAB- PO(M)                                                                                                                                                                           | Nichirei            | 424022           | ~10m            | RT          | DAB             | ~1m             | -                         |            |
|                                          | Polyclonal Rabbit Anti-Mouse Immunoglobulins and Streptavidin/HRP                                                                                                                              | Agilent Technology  | E0464/P0397      | ~30m            | RT          | DAB             | ~5m             | -                         |            |
|                                          | Histofine Simple Stain Rat MAX-PO(MULTI)                                                                                                                                                       | Nichirei            | 414191           | ~30m            | RT          | DAB             | ~3m             | -                         |            |
|                                          | Rabbit Anti-Mouse Immunoglobulins/Biotine - Rabbit F(ab)2 (affinity isolated)                                                                                                                  | Agilent Technology  | E0413            | ~30m            | RT          | DAB             | ~5m             | -                         |            |
|                                          | Histofine Simple Stain Rat PO(MULTI)/<br>Rabbit Anti-Mouse Immunoglobulins/Biotin-RabbitF(ab)2(affinity isolated)                                                                              | -                   | 414191/<br>E0413 | ~30m            | RT          | DAB             | ~3m             | -                         |            |
|                                          | Histofine Simple Stain Rat MAX-PO(MULTI)                                                                                                                                                       | Nichirei            | 414191           | ~30m            | 37°C        | DAB             | ~10m            | -                         |            |
| Histofine Simple Stain Rat MAX-PO(MULTI) | Nichirei                                                                                                                                                                                       | 414191              | ~30m             | RT              | DAB         | ~3m             | -               |                           |            |
| PDX1                                     | VECTASTAIN Elite ABC Kit(rabbit IgG)                                                                                                                                                           | Vector Laboratories | PK-6101          | ~30m            | RT          | DAB             | ~3m             | -                         |            |
| Perilipin 1                              | VECTASTAIN ABC-HRP Kit, Peroxidase (Guinea pig IgG)                                                                                                                                            | Vector Laboratories | PK-4007          | ~30m            | RT          | DAB             | ~5m             | -                         | 111        |
| PGP-9.5                                  | Histofine Simple Stain MAX-PO(R), Rat: Histofine Simple Stain rat-PO(M)<br>Mouse: Goat anti-Rabbit IgG (H+L) Highly Cross-Adsorbed, Mouse (fluorescence)<br>Histofine Simple Stain mouse PO(M) | Nichirei            | -                | ~30m            | RT          | DAB             | ~5m             | -                         | 112        |
|                                          | Polyclonal Goat Anti-Rabbit Immunoglobulins and Streptavidin/HRP                                                                                                                               | Agilent Technology  | E0432/P0397      | ~30m            | RT          | DAB             | ~5m             | -                         |            |
|                                          | Histofine Simple Stain Rat MAX-PO(M)                                                                                                                                                           | Nichirei            | 414171           | -               | -           | -               | No information  | -                         |            |
|                                          | EnVision+/HRP, Mouse                                                                                                                                                                           | Agilent Technology  | -                | ~60m            | RT          | DAB             | ~5m             | -                         | 113        |
| Phospho-Histone H3                       | VECTASTAIN Elite ABC Kit(rabbit IgG)                                                                                                                                                           | Vector Laboratories | PK-6101          | ~30m            | RT          | DAB             | ~1m             | -                         |            |
| Phospho-Histone H2A.X                    | VECTASTAIN Elite ABC Kit(rabbit IgG)                                                                                                                                                           | Vector Laboratories | PK-6101          | ~30m            | RT          | DAB             | ~1m             | -                         |            |
| PMP70                                    | Histofine Simple Stain Rat MAX-PO(MULTI)                                                                                                                                                       | Nichirei            | 414191           | ~30m            | RT          | DAB             | ~10m            | -                         |            |
| Pneumocystis                             | Histofine Simple Stain MAX-PO(MULTI)                                                                                                                                                           | Nichirei            | 424154           | ~30m            | 37°C        | DAB             | ~3m             | -                         | 114        |
| Podoplanin                               | EnVision+ Dual Link, Single Reagents, HRP                                                                                                                                                      | Agilent Technology  | K4063            | ~30m            | RT          | DAB             | ~3m             | -                         | 115        |
|                                          | Histofine Simple Stain MAX-PO(MULTI)                                                                                                                                                           | Nichirei            | 414131F          | ~30m            | RT          | DAB             | ~1m             | -                         |            |
| Prosurfactant Protein C                  | VECTOR ImmPRESS HRP REAGENT Anti-Rabbit IgG                                                                                                                                                    | Vector Laboratories | MP-7451          | ~30m            | RT          | ImmPACT NovaRED | ~3m             | -                         | 116        |
|                                          | Envision+ / HRP, RUO Rabbit                                                                                                                                                                    | Agilent Technology  | K4002            | ~30m            | RT          | DAB             | ~5m             | -                         |            |
| Progesteron Receptor                     | Histofine Simple Stain Rat MAX-PO(M)                                                                                                                                                           | Nichirei            | 414171           | -               | -           | -               | No information  | -                         |            |

Supplementary Table 11-1 Immunological properties of primary antibodies and their respective IHC staining conditions

|                                                     |                    | Primary antibody                    |              |           |             |                    |    |    |    |     |     |    |          |            |            |                 |                                             |                                    |                                             |            |   |
|-----------------------------------------------------|--------------------|-------------------------------------|--------------|-----------|-------------|--------------------|----|----|----|-----|-----|----|----------|------------|------------|-----------------|---------------------------------------------|------------------------------------|---------------------------------------------|------------|---|
|                                                     |                    | Antibody                            |              |           |             | Species reactivity |    |    |    |     |     |    |          |            | Dilution   | Incubation time | Temperature                                 | Supplementary information          | Positive control                            | Reactivity |   |
| Antigen                                             | Clone              | Supplier                            | Catalog No.  | Clonality | Host animal | Rt                 | Mo | Rb | GP | Pri | Dog | Sw | Other    |            |            |                 |                                             |                                    |                                             |            |   |
| Prohibitin                                          | IL-14-10           | Fitzgerald Industries International | 10R-P140AX   | MoAb      | Mo          | ○                  | -  | -  | -  | -   | -   | -  | -        | ~×1/50     | O/N        | 4°C             | -                                           | Other                              | ○                                           |            |   |
|                                                     | -                  | Proteintech                         | 10787-1-AP   | PoAb      | Rb          | ○                  | ○  | -  | -  | -   | ○   | -  | -        | ~×1/50     | O/N        | 4°C             | -                                           | Other                              | ○                                           |            |   |
|                                                     | -                  | LifeSpan Biosciences (LSBio)        | LS-C288770   | PoAb      | Rb          | ○                  | ○  | -  | ○  | -   | ○   | -  | -        | ~×1/100    | O/N        | 4°C             | -                                           | Other                              | ○                                           |            |   |
| Prolactin                                           | -                  | Santa Cruz Biotechnology, Inc.      | sc-271758    | MoAb      | Mo          | ○                  | -  | -  | -  | -   | -   | -  | -        | ~×1/500    | O/N        | 4°C             | -                                           | Pituitary                          | ○                                           |            |   |
|                                                     | EPR19386           | Abcam plc                           | 183967       | MoAb      | Rb          | ○                  | -  | -  | -  | -   | -   | -  | -        | ~×1/1000   | O/N        | 4°C             | -                                           | Pituitary                          | ○                                           |            |   |
| Pseudorabies Virus                                  | -                  | Abcam plc                           | ab3534       | PoAb      | Rb          | -                  | -  | -  | -  | -   | -   | -  | ○        | ~×1/500    | O/N        | 4°C             | -                                           | Pesudorabies virus infected tissue | ○                                           |            |   |
| Rabbit Macrophage                                   | RAM11              | Agilent Technology                  | M063301-8    | MoAb      | Mo          | -                  | -  | ○  | -  | -   | -   | -  | -        | ~×1/200    | ~60m       | RT              | -                                           | Other                              | ○                                           |            |   |
|                                                     |                    |                                     |              | MoAb      | Mo          | -                  | -  | ○  | -  | -   | -   | -  | -        | -          | -          | ~×1/50          | O/N                                         | 4°C                                | -                                           | Spleen     | ○ |
| Rat Mast Cell Protease II                           | -                  | Moredu Scientific                   | MS-RM4       | MoAb      | Mo          | ○                  | -  | -  | -  | -   | -   | -  | -        | ~×1/500    | ~60m       | RT              | -                                           | Stomach                            | ○                                           |            |   |
| Rhodopsin                                           | RET-P1             | Merck                               | MAB5316      | MoAb      | Mo          | ○                  | -  | -  | -  | -   | -   | -  | -        | ~×1/1000   | O/N        | 4°C             | -                                           | Eye                                | ○                                           |            |   |
| RPE65                                               | -                  | Abcam plc                           | ab77381      | PoAb      | Gt          | ○                  | -  | -  | -  | -   | -   | -  | -        | ~×1/500    | O/N        | 4°C             | -                                           | Eye                                | ○                                           |            |   |
| S100                                                | -                  | Agilent Technology                  | IR50461-2J   | PoAb      | Rb          | ○                  | -  | -  | -  | -   | ○   | -  | -        | Prediluted | ~60m       | RT              | -                                           | Nerve                              | ○                                           |            |   |
|                                                     | PoAb               |                                     |              | Rb        | ○           | -                  | -  | -  | -  | -   | -   | -  | -        | -          | Prediluted | ~60m            | RT                                          | -                                  | Spinal cord                                 | ○          |   |
|                                                     | -                  |                                     | MoAb         | Mo        | -           | -                  | -  | -  | -  | -   | ○   | -  | -        | -          | Prediluted | ~60m            | 37°C                                        | -                                  | Brain                                       | ○          |   |
|                                                     | 4C49               | Abcam plc                           | ab4066       | MoAb      | Mo          | -                  | -  | -  | -  | -   | ○   | -  | -        | ~×1/50     | ~30m       | RT              | -                                           | Intestine                          | ○                                           |            |   |
|                                                     | -                  | Nichirei Biosciences                | 422091       | PoAb      | Rb          | ○                  | -  | -  | -  | -   | ○   | -  | -        | -          | Prediluted | ~60m            | RT                                          | -                                  | Nerve                                       | ○          |   |
| -                                                   | PoAb               | Rb                                  | -            | -         | -           | -                  | -  | -  | ○  | ○   | -   | -  | -        | Prediluted | O/N        | 4°C             | -                                           | Brain                              | ○                                           |            |   |
| S100A9 + Calprotectin (S100A8/A9 complex)           | MAC387             | Abcam plc                           | ab22506      | MoAb      | Mo          | -                  | ○  | ○  | -  | -   | -   | -  | -        | ~×1/1000   | O/N        | 4°C             | -                                           | -                                  | ○                                           |            |   |
| Schwann Cell/Peripheral Myelin                      | Schwann/2E         | Cosmo Bio Co., Ltd.                 | GU01-M01AS-A | MoAb      | Mo          | ○                  | -  | -  | -  | -   | ○   | -  | -        | ~×1/1000   | ~60m       | RT              | -                                           | Nerve                              | ○                                           |            |   |
| Sarcoplasmic/Endoplasmic Reticular Calcium ATPase 2 | -                  | Abcam plc                           | ab3625       | PoAb      | Rb          | ○                  | -  | -  | -  | -   | -   | -  | -        | ~×1/1000   | O/N        | 4°C             | -                                           | Muscle                             | ○                                           |            |   |
| SERCA2 ATPase                                       | IID8               | Abcam plc                           | ab2817       | MoAb      | Mo          | ○                  | -  | -  | -  | -   | -   | -  | -        | ~×1/1000   | ~60m       | RT              | -                                           | Heart                              | ○                                           |            |   |
| Steroidogenic Factor 1                              | N1665              | Perseus Proteomics Inc              | PP-N1665-00  | MoAb      | Mo          | ○                  | -  | -  | -  | -   | -   | -  | -        | ~×1/1000   | O/N        | 4°C             | -                                           | Pituitary                          | ○                                           |            |   |
|                                                     | -                  | Abcam plc                           | ab65815      | PoAb      | Rb          | -                  | -  | -  | -  | ○   | -   | -  | -        | ~×1/500    | ~120m      | RT              | -                                           | Kidney                             | ○                                           |            |   |
| Slow Skeletal Myosin Heavy Chain                    | NOQ7.5.4D          | Abcam plc                           | ab11083      | MoAb      | Mo          | ○                  | -  | -  | -  | -   | -   | -  | -        | ~×1/1000   | ~30m       | RT              | -                                           | Muscle                             | ○                                           |            |   |
| Sox-10                                              | -                  | Santa Cruz Biotechnology, Inc.      | sc-365692    | MoAb      | Mo          | -                  | -  | -  | -  | -   | ○   | -  | -        | ~×1/500    | ~60m       | RT              | -                                           | Eye                                | ○                                           |            |   |
| SP-D                                                | VIF11              | Abcam plc                           | ab15688      | MoAb      | Mo          | ○                  | -  | -  | -  | -   | -   | -  | -        | ~×1/25     | ~60m       | RT              | -                                           | Lung                               | ○                                           |            |   |
|                                                     | PSPD               | Bioss Inc                           | bs-1583R     | PoAb      | Rb          | -                  | ○  | -  | -  | -   | -   | -  | -        | ~×1/25     | O/N        | 4°C             | -                                           | Lung                               | ○                                           |            |   |
| Synaptophysin                                       | DAK-SYNAP          | Agilent Technology                  | M731501-2    | MoAb      | Mo          | -                  | -  | -  | -  | ○   | -   | -  | -        | ~×1/50     | O/N        | 4°C             | -                                           | Pancreas                           | ○                                           |            |   |
| Alpha-synuclein (phospho S129)                      | EP1536Y            | Abcam plc                           | ab51253      | MoAb      | Rb          | -                  | ○  | -  | -  | ○   | -   | -  | -        | ~×1/1000   | O/N        | RT              | -                                           | Bone                               | ○                                           |            |   |
| Talin                                               | 8d4                | Sigma-Aldrich                       | T3287        | MoAb      | Mo          | ○                  | ○  | -  | -  | -   | -   | -  | -        | ~×1/500    | ~60m       | RT              | -                                           | Other                              | ○                                           |            |   |
| TER-119/Erythroid Cells                             | TER-119            | BioLegend                           | 116201       | MoAb      | Rt          | -                  | ○  | -  | -  | -   | -   | -  | -        | ~×1/1000   | ~60m       | RT              | -                                           | Spleen                             | ○                                           |            |   |
| Thyroid Transcription Factor 1                      | 8G7G3/1            | Progen                              | 16108        | MoAb      | Mo          | ○                  | -  | -  | -  | -   | -   | -  | -        | ~×1/25     | ~60m       | RT              | -                                           | Thyroid                            | -                                           |            |   |
|                                                     |                    | Agilent Technology                  | M357501-2    | MoAb      | Mo          | ○                  | ○  | -  | -  | -   | -   | -  | -        | -          | ~×1/100    | ~30m            | RT                                          | -                                  | Lung                                        | ○          |   |
|                                                     | SPT24              | Leica Biosystems                    | PA0364       | MoAb      | Mo          | ○                  | -  | -  | -  | -   | ○   | -  | -        | Prediluted | ~60m       | RT              | -                                           | Lung                               | ○                                           |            |   |
|                                                     | EP1584Y            | Abcam plc                           | ab76013      | MoAb      | Rb          | -                  | ○  | -  | -  | -   | -   | -  | -        | ~×1/100    | O/N        | 4°C             | -                                           | Lung                               | ○                                           |            |   |
| Thyroxine                                           | -                  | Sigma-Aldrich                       | T2652        | PoAb      | Rb          | ○                  | -  | -  | -  | -   | -   | -  | -        | ~×1/500    | ~60m       | RT              | -                                           | Thyroid                            | ○                                           |            |   |
| Tubulin βIII                                        | TUJ1               | BioLegend                           | MMS-435P     | MoAb      | Mo          | ○                  | -  | -  | -  | -   | -   | -  | -        | ~×1/1000   | ~60m       | RT              | -                                           | Eye                                | ○                                           |            |   |
|                                                     | TU-20              | Abcam plc                           | ab7751       | MoAb      | Mo          | ○                  | -  | -  | -  | -   | -   | -  | -        | ~×1/200    | ~60m       | RT              | -                                           | Eye                                | -                                           |            |   |
|                                                     | 5G8                | Promega                             | G7121        | MoAb      | Mo          | -                  | -  | -  | -  | -   | ○   | ○  | -        | ~×1/1000   | O/N        | 4°C             | -                                           | Brain                              | ○                                           |            |   |
| Tyrosine Hydroxylase                                | LNC1               | Merck                               | MAB318       | MoAb      | Mo          | ○                  | -  | -  | -  | -   | -   | -  | -        | ~×1/100    | ~30m       | RT              | Diluted with IMMUNOSHOT immunostaining Fine | Brain                              | ○                                           |            |   |
|                                                     |                    |                                     |              | MoAb      | Mo          | -                  | -  | -  | -  | -   | -   | -  | ○        | ~×1/100    | ~30m       | RT              | -                                           | Brain                              | ○                                           |            |   |
|                                                     |                    |                                     |              | MoAb      | Mo          | -                  | ○  | -  | -  | -   | -   | -  | -        | -          | -          | ~×1/100         | ~30m                                        | RT                                 | Diluted with IMMUNOSHOT immunostaining Fine | Brain      | ○ |
|                                                     |                    |                                     |              | MoAb      | Mo          | -                  | ○  | -  | -  | -   | -   | -  | -        | -          | -          | ~×1/1000        | O/N                                         | 4°C                                | -                                           | Brain      | ○ |
|                                                     | -                  | Abcam plc                           | ab112        | PoAb      | Rb          | ○                  | ○  | -  | -  | ○   | ○   | -  | -        | ~×1/1000   | ~60m       | RT              | -                                           | Brain                              | ○                                           |            |   |
| -                                                   | Enzo Life Sciences | BML-TZ1010-0050                     | PoAb         | Rb        | ○           | -                  | -  | -  | -  | -   | -   | -  | ~×1/1000 | O/N        | 4°C        | -               | Brain                                       | ○                                  |                                             |            |   |

Supplementary Table 11-2 Immunological properties of primary antibodies and their respective IHC staining conditions

| Antibody                                            | Primary antibody |             |           |                          |                                          |           |                          |                        |                                                 |                   |               |
|-----------------------------------------------------|------------------|-------------|-----------|--------------------------|------------------------------------------|-----------|--------------------------|------------------------|-------------------------------------------------|-------------------|---------------|
|                                                     | Fixing solution  | Fixing time | Embedding | Antigen retrieval method |                                          | Solution  | Concentration/pH/reagent | Incubation temperature | Incubation time                                 | Blocking          |               |
|                                                     |                  |             |           | Method                   |                                          |           |                          |                        |                                                 | Blocking solution | Blocking time |
| Prohibitin                                          | 10% For          | Unknown     | P         | MW                       | HistoVT One                              | -         | -                        | ~30m                   | -                                               | -                 |               |
|                                                     | 10% For          | Unknown     | P         | MW                       | HistoVT One                              | -         | -                        | ~30m                   | -                                               | -                 |               |
|                                                     | 10% For          | ~1w         | P         | MW                       | HistoVT One                              | -         | -                        | ~30m                   | -                                               | -                 |               |
| Prolactin                                           | 10% For          | Unknown     | P         | Not complied             | -                                        | -         | -                        | -                      | -                                               | -                 |               |
|                                                     | 10% For          | ~1m         | P         | Proteinase               | -                                        | -         | RT                       | ~10m                   | Goat Serum                                      | ~1hr              |               |
| Pseudorabies Virus                                  | 10% For          | ~1w         | P         | MW                       | Citric acid BF                           | -         | 100°C<                   | ~30m                   | Blocking One                                    | ~1hr              |               |
| Rabbit Macrophage                                   | 10% For          | ~1m         | P         | Not complied             | -                                        | -         | -                        | -                      | Goat Serum                                      | ~1hr              |               |
|                                                     | 10% For          | ~1m         | P         | Not complied             | -                                        | -         | -                        | -                      | BSA                                             | ~1hr              |               |
| Rat Mast Cell Protease II                           | 10% For          | ~1w         | P         | Not complied             | -                                        | -         | -                        | -                      | 3% H <sub>2</sub> O <sub>2</sub> /Protein Block | ~1hr              |               |
| Rhodopsin                                           | DA               | Unknown     | P         | PC                       | EDTA                                     | -         | Unknown                  | ~5m                    | Block Ace                                       | ~1hr              |               |
| RPE65                                               | DA               | Unknown     | P         | MW                       | Citric acid BF                           | -         | Unknown                  | ~10m                   | Block Ace                                       | ~1hr              |               |
| S100                                                | 10% For          | ~1d         | P         | Not complied             | -                                        | -         | -                        | -                      | 5% Skim milk in PBS                             | ~1hr              |               |
|                                                     | 10% For          | ~O/N        | P         | Proteinase               | -                                        | ×1000     | 37°C                     | ~10m                   | VECTASTAIN Elite ABC Kit(rabbit)                | 30min             |               |
|                                                     | 10% For          | ~1w         | P         | AU                       | Citric acid BF                           | -         | 100°C<                   | ~10m                   | Blocking One                                    | ~1hr              |               |
|                                                     | 10% For          | ~1w         | P         | MW                       | Citric acid BF                           | 0.1M      | 100°C<                   | ~30m                   | No information                                  | -                 |               |
|                                                     | 10% For          | ~1d         | P         | Not complied             | -                                        | -         | -                        | -                      | 5% Skim milk in PBS                             | ~1hr              |               |
|                                                     | 10% For          | ~1w         | P         | Not complied             | -                                        | -         | -                        | -                      | 10% Goat Serum                                  | ~1hr              |               |
| S100A9 + Calprotectin (S100A8/A9 complex)           | 10% For          | Unknown     | P         | MW                       | HistoVT One                              | -         | -                        | ~30m                   | -                                               | -                 |               |
| Schwann Cell/Peripheral Myelin                      | 10% For          | ~1d         | P         | Proteinase               | -                                        | 100ug/ml  | RT                       | ~10m                   | 5% Skim milk in PBS                             | ~1hr              |               |
| Sarcoplasmic/Endoplasmic Reticular Calcium ATPase 2 | 10% For          | ~1w         | P         | Trypsin                  | Not complied                             | -         | 37°C                     | ~30m                   | No information                                  | -                 |               |
| SERCA2 ATPase                                       | 10% For          | ~1w         | P         | Proteinase               | -                                        | -         | RT                       | ~5m                    | No information                                  | -                 |               |
| Steroidogenic Factor 1                              | 10% For          | ~1w         | P         | AU                       | Citric acid BF                           | -         | 100°C<                   | ~30m                   | No information                                  | -                 |               |
|                                                     | 10% For          | ~10d        | P         | AU                       | Citric acid BF                           | 0.01mol/L | 100°C<                   | ~5m                    | 0.5% Casein/PBS                                 | ~1hr              |               |
| Slow Skeletal Myosin Heavy Chain                    | PFA              | ~1w         | P         | PC                       | EDTA                                     | 1mbol/L   | 100°C<                   | ~10m                   | Protein block serum                             | ~1hr              |               |
| Sox-10                                              | 10% For          | ~1w         | P         | PC                       | Citric acid BF                           | -         | 100°C<                   | ~10m                   | Goat Serum                                      | ~1hr              |               |
| SP-D                                                | 10% For          | ~1w         | P         | AU                       | Citric acid BF                           | -         | 100°C<                   | ~30m                   | 3% H <sub>2</sub> O <sub>2</sub> /Protein Block | ~1hr              |               |
|                                                     | 10% For          | Unknown     | P         | Proteinase               | -                                        | -         | RT                       | ~5m                    | Block Ace                                       | ~1hr              |               |
| Synaptophysin                                       | 10% For          | ~1w         | P         | AU                       | Tris BF                                  | -         | 100°C<                   | ~10m                   | Blocking One                                    | ~1hr              |               |
| Alpha-synuclein (phospho S129)                      | 10% For          | ~1y         | P         | AU                       | Citric acid BF                           | 0.01mol/L | 100°C<                   | ~10m                   | 10% BoVine Serum/PBS                            | ~1hr              |               |
| Talin                                               | PFA              | Unknown     | P         | Not complied             | -                                        | -         | -                        | -                      | -                                               | -                 |               |
| TER-119/Erythroid Cells                             | 10% For          | ~1w         | P         | MW                       | Distilled water                          | -         | 70~100°C                 | ~30m                   | No information                                  | -                 |               |
| Thyroid Transcription Factor 1                      | Unknown          | Unknown     | P         | MW                       | Immunosaver                              | -         | 70~100°C                 | ~30m                   | No information                                  | -                 |               |
|                                                     | 10% For          | ~1m         | P         | Boil                     | Citric acid BF                           | -         | 70~100°C                 | ~120m                  | -                                               | -                 |               |
|                                                     | 10% For          | ~1d         | P         | MW                       | Tris-EDTA (10 mM Tris/1 mM EDTA, pH 9.0) | 1mM       | 70~100°C                 | ~30m                   | 5% Skim milk in PBS                             | ~1hr              |               |
|                                                     | 10% For          | ~1w         | P         | AU                       | Citric acid BF                           | -         | 100°C<                   | ~30m                   | No information                                  | -                 |               |
| Thyroxin                                            | 10% For          | ~O/N        | P         | Not complied             | -                                        | -         | -                        | -                      | VECTASTAIN Elite ABC Kit(rabbit)                | 30min             |               |
| Tubulin βIII                                        | PFA              | ~1d         | P         | AU                       | Citric acid BF                           | -         | 100°C<                   | ~5m                    | 3% H <sub>2</sub> O <sub>2</sub> /Protein Block | ~1hr              |               |
|                                                     | 10% For          | ~1w         | P         | MW                       | Citric acid BF                           | -         | 70~100°C                 | ~30m                   | No information                                  | -                 |               |
|                                                     | 10% For          | ~1w         | P         | AU                       | Citric acid BF                           | -         | 100°C<                   | ~30m                   | 10% Goat Serum                                  | ~1hr              |               |
| Tyrosine Hydroxylase                                | 10% For          | ~1w         | P         | PC                       | -                                        | -         | 100°C<                   | ~10m                   | Block Ace                                       | ~1hr              |               |
|                                                     | 10% For          | ~1w         | P         | PC                       | -                                        | -         | 100°C<                   | ~10m                   | Block Ace                                       | ~1hr              |               |
|                                                     | 10% For          | ~1w         | P         | PC                       | -                                        | -         | 100°C<                   | ~10m                   | Block Ace                                       | ~1hr              |               |
|                                                     | 10% For          | Unknown     | P         | Boil                     | Citric acid BF                           | -         | Unknown                  | ~10m                   | Block Ace                                       | ~1hr              |               |
|                                                     | 10% For          | ~2m         | P         | Not complied             | -                                        | -         | -                        | -                      | 3% H <sub>2</sub> O <sub>2</sub> /Protein Block | ~1hr              |               |
|                                                     | 10% For          | ~O/N        | P         | Not complied             | -                                        | -         | -                        | -                      | VECTASTAIN Elite ABC Kit(rabbit)                | 30min             |               |



Supplementary Table 11-3 Immunological properties of primary antibodies and their respective IHC staining conditions

| Primary antibody                                    | Secondary antibody                                                           |  |                     |             |                 |             |         | Supplementary information | Figure No.                        |                 |
|-----------------------------------------------------|------------------------------------------------------------------------------|--|---------------------|-------------|-----------------|-------------|---------|---------------------------|-----------------------------------|-----------------|
| Antibody                                            | Secondary antibody information                                               |  | Supplier            | Catalog No. | Incubation time | Temperature | Reagent |                           |                                   | Incubation time |
|                                                     | Product                                                                      |  |                     |             |                 |             |         |                           |                                   |                 |
| Prohibitin                                          | Histofine Simple Stain Rat MAX-PO(M)                                         |  | Nichirei            | 414171      | ~30m            | RT          | DAB     | ~3m                       | -                                 |                 |
|                                                     | Histofine Simple Stain Rat MAX-PO(R)                                         |  | Nichirei            | 414181      | ~30m            | RT          | DAB     | ~5m                       | -                                 |                 |
|                                                     | Histofine Simple Stain Rat MAX-PO(R)                                         |  | Nichirei            | 414181      | -               | -           | DAB     | ~3m                       | -                                 |                 |
| Prolactin                                           | Histofine Simple Stain Rat MAX-PO(MULTI)                                     |  | Nichirei            | 414191      | -               | -           | -       | No information            | -                                 |                 |
|                                                     | Histofine Simple Stain Rat MAX-PO(MULTI)                                     |  | Nichirei            | 414191F     | ~30m            | RT          | DAB     | ~1m                       | -                                 |                 |
| Pseudorabies Virus                                  | Histofine Simple Stain MAX-PO(MULTI)                                         |  | Nichirei            | 424154      | ~30m            | 37°C        | DAB     | ~3m                       | -                                 |                 |
| Rabbit Macrophage                                   | Histofine Simple Stain Rat MAX-PO(MULTI)                                     |  | Nichirei            | 414191F     | ~30m            | RT          | DAB     | ~1m                       | -                                 |                 |
|                                                     | Polyclonal Rabbit Anti-Mouse Immunoglobulins and Streptavidin/HRP            |  | Agilent Technology  | E0464/P0397 | ~30m            | RT          | DAB     | ~1m                       | -                                 |                 |
| Rat Mast Cell Protease II                           | Histofine Simple Stain Rat MAX-PO(M)                                         |  | Nichirei            | 414171      | ~30m            | RT          | DAB     | ~20s                      | -                                 |                 |
| Rhodopsin                                           | Histofine Simple Stain Rat MAX-PO(MULTI)                                     |  | Nichirei            | 414191      | ~30m            | RT          | DAB     | ~3m                       | -                                 |                 |
| RPE65                                               | Histofine Simple Stain Rat MAX-PO(G)                                         |  | Nichirei            | 414331      | ~30m            | RT          | DAB     | ~3m                       | -                                 |                 |
| S100                                                | Histofine Simple Stain Rat MAX-PO(R)                                         |  | Nichirei            | 414181      | ~60m            | RT          | DAB     | ~10m                      | -                                 |                 |
|                                                     | VECTASTAIN Elite ABC Kit(rabbit IgG)                                         |  | Vector Laboratories | PK-6101     | ~30m            | RT          | DAB     | ~3m                       | -                                 |                 |
|                                                     | Histofine Simple Stain MAX-PO(MULTI)                                         |  | Nichirei            | 424154      | ~30m            | 37°C        | DAB     | ~3m                       | -                                 |                 |
|                                                     | Histofine Simple Stain MAX-PO(M)                                             |  | Nichirei            | 424131      | ~30m            | RT          | DAB     | ~10m                      | -                                 |                 |
|                                                     | Histofine Simple Stain Rat MAX-PO(R)                                         |  | Nichirei            | 414181      | ~60m            | RT          | DAB     | ~10m                      | -                                 |                 |
|                                                     | EnVision+/HRP, Rabbit                                                        |  | Agilent Technology  | -           | ~30m            | RT          | DAB     | ~3m                       | -                                 |                 |
| S100A9 + Calprotectin (S100A8/A9 complex)           | Histofine Simple Stain Rat MAX-PO(MULTI)                                     |  | Nichirei            | 414191      | ~30m            | RT          | DAB     | ~1m                       | -                                 |                 |
| Schwann Cell/Peripheral Myelin                      | Histofine Simple Stain Rat MAX-PO(M)                                         |  | Nichirei            | 414171      | ~60m            | RT          | DAB     | ~10m                      | -                                 |                 |
| Sarcoplasmic/Endoplasmic Reticular Calcium ATPase 2 | VECTASTAIN Elite ABC Kit(rabbit IgG)                                         |  | Vector Laboratories | PK-6101     | ~30m            | RT          | DAB     | ~5m                       | -                                 |                 |
| SERCA2 ATPase                                       | Rabbit Anti-Mouse Immunoglobulins/Biotin - Rabbit F(ab)2 (affinity isolated) |  | Agilent Technology  | E0413       | ~30m            | RT          | DAB     | ~5m                       | -                                 |                 |
| Steroidogenic Factor 1                              | Histofine Simple Stain Rat MAX-PO(M)                                         |  | Nichirei            | 414171      | ~30m            | RT          | DAB     | ~3m                       | -                                 |                 |
|                                                     | Histofine Simple Stain MAX-PO(R)                                             |  | Nichirei            | 424141      | ~30m            | RT          | DAB     | ~3m                       | -                                 |                 |
| Slow Skeletal Myosin Heavy Chain                    | Histofine Simple Stain Rat MAX-PO(MULTI)                                     |  | Nichirei            | 414191      | ~30m            | RT          | DAB     | ~30s                      | -                                 |                 |
| Sox-10                                              | Histofine Simple Stain Rat MAX-PO(M)                                         |  | Nichirei            | 414171      | ~30m            | RT          | DAB     | ~5m                       | -                                 |                 |
|                                                     | Histofine Simple Stain Rat MAX-PO(M)                                         |  | Nichirei            | 414171      | ~30m            | RT          | DAB     | ~5m                       | -                                 |                 |
| SP-D                                                | Histofine Simple Stain Mouse MAX-PO(R)                                       |  | Nichirei            | 414341      | ~30m            | RT          | DAB     | ~3m                       | -                                 |                 |
|                                                     | Histofine Simple Stain Rat MAX-PO(M)                                         |  | Nichirei            | 414171      | ~30m            | RT          | DAB     | ~5m                       | -                                 |                 |
| Synaptophysin                                       | Histofine Simple Stain MAX-PO(MULTI)                                         |  | Nichirei            | 424154      | ~30m            | 37°C        | DAB     | ~3m                       | -                                 |                 |
| Alpha-synuclein (phospho S129)                      | VECTOR Biotin anti-rabbitIgG +ABC standard Kit(PK4000)                       |  | Vector Laboratories | PK4000      | ~120m           | RT          | DAB     | 20m<                      | -                                 |                 |
| Talin                                               | -                                                                            |  | -                   | -           | -               | -           | -       | No information            | For fluorescent antibody method   |                 |
| TER-119/Erythroid Cells                             | Discontinued                                                                 |  | -                   | -           | -               | -           | DAB     | ~5m                       | -                                 |                 |
| Thyroid Transcription Factor 1                      | Histofine Simple Stain Rat MAX-PO(MULTI)                                     |  | Nichirei            | 414191      | ~30m            | RT          | DAB     | ~10m                      | -                                 |                 |
|                                                     | Histofine Simple Stain Rat MAX-PO(M)                                         |  | Nichirei            | 414171      | ~30m            | RT          | DAB     | ~5m                       | -                                 |                 |
|                                                     | Histofine Simple Stain Rat MAX-PO(M)                                         |  | Nichirei            | 414171      | ~60m            | RT          | DAB     | ~10m                      | -                                 |                 |
|                                                     | Envision+ / HRP, RUO Rabbit                                                  |  | Agilent Technology  | K4002       | ~30m            | RT          | DAB     | ~5m                       | -                                 |                 |
| Thyroxin                                            | VECTASTAIN Elite ABC Kit(rabbit IgG)                                         |  | Vector Laboratories | PK-6101     | ~30m            | RT          | DAB     | ~30s                      | -                                 |                 |
|                                                     | Envision+ / HRP, RUO Mouse                                                   |  | Agilent Technology  | K4001       | ~30m            | RT          | DAB     | ~1m                       | -                                 |                 |
| Tubulin βIII                                        | Histofine Simple Stain Rat MAX-PO(MULTI)                                     |  | Nichirei            | 414191      | ~30m            | RT          | DAB     | ~5m                       | Eyes fixed by Davidson's fixative |                 |
|                                                     | EnVision+ / HRP, RUO Rabbit                                                  |  | Agilent Technology  | -           | ~30m            | RT          | DAB     | ~3m                       | -                                 |                 |
|                                                     | Histofine Simple Stain Rat MAX-PO(MULTI)                                     |  | Nichirei            | 414191      | ~30m            | RT          | DAB     | ~10m                      | -                                 |                 |
| Tyrosine Hydroxylase                                | Histofine Simple Stain Rat MAX-PO(MULTI)                                     |  | Nichirei            | 414191      | ~30m            | RT          | DAB     | ~10m                      | -                                 |                 |
|                                                     | Histofine Simple Stain Rat MAX-PO(MULTI)                                     |  | Nichirei            | 414191      | ~30m            | RT          | DAB     | ~10m                      | -                                 |                 |
|                                                     | Histofine Simple Stain Mouse MAX-PO(R)                                       |  | Nichirei            | 414341      | ~10m            | RT          | DAB     | ~10m                      | -                                 |                 |
|                                                     | Histofine Simple Stain Rat MAX-PO(R)                                         |  | Nichirei            | 414181      | ~10m            | RT          | DAB     | ~10m                      | -                                 |                 |
|                                                     | Envision+ / HRP, RUO Rabbit                                                  |  | Agilent Technology  | K4003       | ~30m            | RT          | DAB     | ~1m                       | -                                 |                 |
|                                                     | VECTASTAIN Elite ABC Kit(rabbit IgG)                                         |  | Vector Laboratories | PK-6101     | ~30m            | RT          | DAB     | ~1m                       | -                                 |                 |

Supplementary Table 12-1 Immunological properties of primary antibodies and their respective IHC staining conditions

| Primary antibody                     |                  |                                |                                |           |                    |    |    |    |    |     |     |    |          |            |                 |             |                           |                  |            |        |   |
|--------------------------------------|------------------|--------------------------------|--------------------------------|-----------|--------------------|----|----|----|----|-----|-----|----|----------|------------|-----------------|-------------|---------------------------|------------------|------------|--------|---|
| Antibody                             |                  |                                |                                |           | Species reactivity |    |    |    |    |     |     |    |          | Dilution   | Incubation time | Temperature | Supplementary information | Positive control | Reactivity |        |   |
| Antigen                              | Clone            | Supplier                       | Catalog No.                    | Clonality | Host animal        | Rt | Mo | Rb | GP | Pri | Dog | Sw | Other    |            |                 |             |                           |                  |            |        |   |
| Tyrosine Tubulin                     | TUB-1A2          | Sigma-Aldrich                  | T9028                          | MoAb      | Mo                 | ○  | -  | -  | -  | -   | -   | -  | -        | ~×1/1000   | O/N             | 4°C         | -                         | Testis           | ○          |        |   |
| Uroplakin III                        | AU1              | Progen                         | 651108                         | MoAb      | Mo                 | ○  | -  | -  | -  | -   | -   | -  | -        | Prediluted | O/N             | 4°C         | -                         | Kidney           | ○          |        |   |
|                                      |                  |                                |                                | MoAb      | Mo                 | -  | -  | -  | -  | -   | -   | -  | -        | -          | ~×1/10          | ~60m        | 37°C                      | -                | Urinary    | ○      |   |
|                                      |                  |                                |                                | MoAb      | Mo                 | ○  | -  | -  | -  | -   | -   | -  | -        | -          | -               | Prediluted  | ~60m                      | RT               | -          | Kidney | ○ |
| Uteroglobin                          | EOR19846         | Abcam plc                      | ab213203                       | MoAb      | Rb                 | ○  | -  | -  | -  | -   | -   | -  | ~×1/5000 | ~30m       | RT              | -           | Lung                      | ○                |            |        |   |
| VC1.1 (HNK-1/N-CAM)                  | VC1.1            | Sigma-Aldrich                  | C6680                          | MoAb      | Mo                 | ○  | -  | -  | -  | -   | -   | -  | -        | ~×1/100    | ~60m            | RT          | -                         | Eye              | ○          |        |   |
| VE-Cadherin                          | -                | Abcam plc                      | ab33168                        | PoAb      | Rb                 | -  | -  | ○  | -  | -   | -   | -  | -        | ~×1/1000   | O/N             | 4°C         | -                         | Vessel           | ○          |        |   |
| Vascular Endothelial Growth Factor A | -                | Aviva Systems Biology Corp.    | ARP60981_P050                  | PoAb      | Rb                 | -  | -  | -  | -  | -   | ○   | -  | -        | ~×1/500    | ~60m            | RT          | -                         | Hemangiosarcoma  | ○          |        |   |
| Vimentin                             | V9               | Agilent Technology             | IR63061-2J                     | MoAb      | Mo                 | ○  | -  | ○  | -  | -   | ○   | -  | -        | Prediluted | ~60m            | RT          | ~×1/5                     | -                | ○          |        |   |
|                                      |                  |                                |                                | MoAb      | Mo                 | ○  | -  | -  | -  | -   | -   | -  | Marmoset | Prediluted | ~60m            | RT          | -                         | Kidney           | ○          |        |   |
|                                      |                  |                                |                                | MoAb      | Mo                 | -  | -  | -  | -  | -   | -   | ○  | ○        | -          | Prediluted      | O/N         | 4°C                       | -                | Skin       | ○      |   |
|                                      |                  |                                |                                | MoAb      | Mo                 | -  | -  | -  | -  | -   | -   | ○  | ○        | -          | Prediluted      | ~60m        | 37°C                      | -                | Lung       | ○      |   |
|                                      |                  |                                |                                | MoAb      | Mo                 | -  | -  | -  | -  | -   | -   | ○  | -        | Cow        | Prediluted      | ~30m        | RT                        | -                | Intestine  | ○      |   |
|                                      |                  |                                | Merck                          | IF 01     | MoAb               | Mo | ○  | -  | ○  | -   | ○   | -  | -        | ~×1/100    | ~60m            | RT          | -                         | Eye              | ○          |        |   |
|                                      |                  | D21H3                          | Cell Signaling Technology      | 5741      | MoAb               | Rb | -  | ○  | -  | -   | -   | -  | -        | ~×1/500    | O/N             | 4°C         | -                         | Skin             | ○          |        |   |
|                                      |                  | -                              | Santa Cruz Biotechnology, Inc. | sc-7557   | PoAb               | Rb | -  | ○  | -  | -   | -   | -  | -        | ~×1/500    | O/N             | 4°C         | -                         | Skin             | ○          |        |   |
|                                      | EPR3776          | Abcam plc                      | ab92547                        | MoAb      | Rb                 | ○  | ○  | -  | -  | -   | ○   | -  | Cat      | ~×1/1000   | ~60m            | RT          | -                         | Liver            | ○          |        |   |
| Vinculin                             | V284             | Merck                          | 05-386                         | MoAb      | Mo                 | ○  | ○  | ○  | -  | -   | -   | -  | -        | ~×1/100    | ~60m            | RT          | -                         | Other            | ○          |        |   |
| Von Willebrand Factor                | F8/86            | Agilent Technology             | M061601-2                      | MoAb      | Mo                 | -  | -  | -  | -  | -   | ○   | -  | -        | ~×1/50     | O/N             | 4°C         | -                         | Spleen           | ○          |        |   |
|                                      | -                | Abcam plc                      | ab6994                         | PoAb      | Rb                 | ○  | -  | -  | -  | -   | -   | -  | -        | ~×1/1000   | O/N             | 4°C         | -                         | Liver            | ○          |        |   |
|                                      | -                |                                |                                | PoAb      | Rb                 | ○  | -  | -  | -  | -   | ○   | -  | -        | -          | ~×1/1000        | ~60m        | RT                        | -                | Vessel     | ○      |   |
|                                      | -                |                                |                                | PoAb      | Rb                 | ○  | -  | -  | -  | -   | -   | -  | -        | -          | ~×1/1000        | O/N         | 4°C                       | -                | Vessel     | ○      |   |
|                                      | -                |                                |                                | PoAb      | Rb                 | -  | ○  | -  | -  | -   | -   | -  | -        | -          | -               | ~×1/1000    | ~60m                      | RT               | -          | Liver  | ○ |
|                                      | -                |                                |                                | PoAb      | Rb                 | ○  | -  | -  | -  | -   | -   | -  | -        | -          | -               | ~×1/1000    | ~60m                      | RT               | -          | Liver  | ○ |
| Willms' Tumor 1                      | -                | Santa Cruz Biotechnology, Inc. | SC-192                         | PoAb      | Rb                 | -  | -  | -  | -  | -   | ○   | ○  | -        | ~×1/500    | O/N             | 4°C         | -                         | Nephroblastoma   | ○          |        |   |
|                                      | -                |                                |                                | PoAb      | Rb                 | ○  | -  | -  | -  | -   | -   | -  | -        | ~×1/1000   | O/N             | 4°C         | -                         | Kidney           | ○          |        |   |
|                                      | 6F-H2            | Agilent Technology             | IS05530-2                      | MoAb      | Mo                 | ○  | -  | -  | -  | -   | -   | -  | -        | ~×1/50     | ~60m            | RT          | -                         | Kidney           | ○          |        |   |
|                                      | CAN-R9(IHC)-56-2 | Abcam plc                      | ab89901                        | MoAb      | Rb                 | -  | ○  | -  | -  | -   | -   | -  | -        | ~×1/500    | O/N             | 4°C         | -                         | Kidney           | ○          |        |   |
|                                      | -                | Abcam plc                      | ab15249                        | PoAb      | Rb                 | -  | ○  | -  | -  | -   | -   | -  | -        | ~×1/1000   | O/N             | 4°C         | -                         | Kidney           | ○          |        |   |
|                                      | 6F-H2            | Thermo Fisher Scientific       | MS-1837                        | MoAb      | Mo                 | ○  | -  | -  | -  | -   | ○   | -  | -        | ~×1/500    | ~60m            | RT          | -                         | Kidney           | ○          |        |   |
| YM1/Chitinase 3-like 3               | 281926           | R&D Systems                    | MAB2446                        | MoAb      | Rt                 | -  | ○  | -  | -  | -   | -   | -  | -        | ~×1/200    | ~60m            | RT          | -                         | Liver            | ○          |        |   |
| ZO-1                                 | -                | Thermo Fisher Scientific       | 61-7300                        | PoAb      | Rb                 | ○  | -  | -  | -  | -   | -   | -  | -        | ~×1/50     | O/N             | 4°C         | -                         | Other            | ○          |        |   |
| γH2AX                                | -                | Bethyl Laboratories, Inc.      | IHC-00059                      | PoAb      | Rb                 | -  | ○  | -  | -  | -   | -   | -  | -        | ~×1/500    | O/N             | 4°C         | -                         | Other            | △          |        |   |

Supplementary Table 12-2 Immunological properties of primary antibodies and their respective IHC staining conditions

| Antibody                             | Primary antibody |             |           |                          |                |                          |                        |                 |                                                 |               |
|--------------------------------------|------------------|-------------|-----------|--------------------------|----------------|--------------------------|------------------------|-----------------|-------------------------------------------------|---------------|
|                                      | Fixing solution  | Fixing time | Embedding | Antigen retrieval method | Solution       | Concentration/pH/reagent | Incubation temperature | Incubation time | Blocking                                        |               |
|                                      |                  |             |           | Method                   |                |                          |                        |                 | Blocking solution                               | Blocking time |
| Tyrosine Tubulin                     | 10% For          | Unknown     | P         | Not complied             | -              | -                        | -                      | -               | -                                               | -             |
| Uroplakin III                        | 10% For          | ~1w         | P         | AU                       | Citric acid BF | -                        | 100°C<                 | ~30m            | Protein block serum                             | ~1hr          |
|                                      | 10% For          | ~1w         | P         | MW                       | Citric acid BF | -                        | 100°C<                 | ~30m            | Blocking One                                    | ~1hr          |
|                                      | 10% For          | ~1m         | P         | AU                       | Citric acid BF | pH6.0                    | 100°C<                 | ~10m            | Goat Serum                                      | ~1hr          |
| Uteroglobin                          | 10% For          | ~1m         | P         | Boil                     | Citric acid BF | -                        | 70~100°C               | ~30m            | -                                               | -             |
| VC1.1 (HNK-1/N-CAM)                  | PFA              | ~1d         | P         | AU                       | Citric acid BF | -                        | 100°C<                 | ~5m             | 3% H <sub>2</sub> O <sub>2</sub> /Protein Block | ~1hr          |
| VE-Cadherin                          | 10% For          | ~1m         | P         | AU                       | Citric acid BF | pH6.0                    | 70~100°C               | ~30m            | Block Ace                                       | ~1hr          |
| Vascular Endothelial Growth Factor A | 10% For          | ~1w         | P         | AU                       | Citric acid BF | -                        | 100°C<                 | ~10m            | Blocking One                                    | ~1hr          |
| Vimentin                             | 10% For          | ~1d         | P         | MW                       | Citric acid BF | 0.01 M                   | 70~100°C               | ~30m            | 5% Skim milk in PBS                             | ~1hr          |
|                                      | 10% For          | ~10d        | P         | PC                       | Citric acid BF | 10mM                     | 100°C<                 | ~10m            | Block Ace                                       | ~1hr          |
|                                      | 10% For          | ~1w         | P         | AU                       | Citric acid BF | -                        | 100°C<                 | ~30m            | 10% Goat Serum                                  | ~1hr          |
|                                      | 10% For          | ~1w         | P         | MW                       | Citric acid BF | -                        | 100°C<                 | ~30m            | Blocking One                                    | ~1hr          |
|                                      | 10% For          | ~1w         | P         | MW                       | Citric acid BF | 0.1M                     | 100°C<                 | ~30m            | No information                                  | -             |
|                                      | 10% For          | ~1w         | P         | Not complied             | -              | -                        | -                      | -               | 2% BSA/PBS                                      | ~1hr          |
|                                      | 10% For          | ~1w         | P         | PC                       | Citric acid BF | 0.01M                    | 100°C<                 | ~5m             | 3% H <sub>2</sub> O <sub>2</sub>                | ~1hr          |
|                                      | 10% For          | ~1m         | P         | AU                       | Citric acid BF | pH6.0                    | 100°C<                 | ~30m            | Goat Serum                                      | ~1hr          |
|                                      | 10% For          | ~1w         | P         | Boil                     | EDTA           | -                        | 100°C<                 | ~10m            | Goat Serum                                      | ~1hr          |
| Vinculin                             | PFA              | Unknown     | -         | Not complied             | -              | -                        | -                      | -               | -                                               |               |
| Von Willebrand Factor                | 10% For          | ~1w         | P         | AU                       | Citric acid BF | -                        | 100°C<                 | ~30m            | -                                               | -             |
|                                      | 10% For          | ~1m         | P         | Proteinase               | -              | 0.4mg/mL                 | -                      | -               | Casein                                          | O/N           |
|                                      | 10% For          | ~1d         | P         | Proteinase               | -              | 100ug/ml                 | RT                     | ~10m            | 5% Skim milk in PBS                             | ~1hr          |
|                                      | 10% For          | ~O/N        | P         | Proteinase               | -              | ×1000                    | 37°C                   | ~10m            | VECTASTAIN Elite ABC Kit(rabbit)                | 30min         |
|                                      | 10% For          | ~1w         | P         | Proteinase               | -              | -                        | RT                     | ~5m             | No information                                  | -             |
|                                      | 10% For          | ~1w         | P         | Proteinase               | -              | -                        | RT                     | ~5m             | No information                                  | -             |
| Willms' Tumor 1                      | 10% For          | ~1w         | P         | AU                       | Citric acid BF | -                        | 100°C<                 | ~30m            | 10% Goat Serum                                  | ~1hr          |
|                                      | 10% For          | ~1y         | P         | AU                       | Citric acid BF | 0.01mol/L                | 100°C<                 | ~5m             | 0.5% Casein/PBS                                 | ~1hr          |
|                                      | 10% For          | ~O/N        | P         | PC                       | Citric acid BF | -                        | 70~100°C               | ~10m            | VECTASTAIN Elite ABC Kit(mouse)                 | 30min         |
|                                      | 10% For          | ~1w         | P         | MW                       | EDTA           | 1mM                      | 100°C<                 | ~30m            | 2.5% Normal serum                               | ~1hr          |
|                                      | 10% For          | ~1m         | P         | AU                       | Citric acid BF | pH6.0                    | 100°C<                 | ~10m            | Goat Serum                                      | ~1hr          |
| YM1/Chitinase 3-like 3               | 10% For          | ~O/N        | P         | PC                       | EDTA           | -                        | 100°C<                 | ~10m            | Goat Serum                                      | ~1hr          |
| ZO-1                                 | 10% For          | Unknown     | P         | MW                       | HistoVT One    | -                        | -                      | ~30m            | -                                               | -             |
| γH2AX                                | F, Sli, 10% For  | ~1hr        | F         | Not complied             | -              | -                        | -                      | -               | Swine serum(x500)                               | ~1hr          |

Supplementary Table 12-3 Immunological properties of primary antibodies and their respective IHC staining conditions

| Primary antibody                     | Secondary antibody                                       |  |                     |             |                 |             |                 | Supplementary information       | Figure No. |                 |
|--------------------------------------|----------------------------------------------------------|--|---------------------|-------------|-----------------|-------------|-----------------|---------------------------------|------------|-----------------|
| Antibody                             | Secondary antibody information                           |  | Supplier            | Catalog No. | Incubation time | Temperature | Reagent         |                                 |            | Incubation time |
|                                      | Product                                                  |  |                     |             |                 |             |                 |                                 |            |                 |
| Tyrosine Tubulin                     | Histofine Simple Stain Rat MAX-PO(MULTI)                 |  | Nichirei            | 414191      | ~30m            | RT          | DAB             | ~1m                             | -          |                 |
| Uroplakin III                        | Envision+ / HRP, RUO Mouse                               |  | Agilent Technology  | K4001       | ~30m            | RT          | DAB             | ~5m                             | 130        |                 |
|                                      | Histofine Simple Stain MAX-PO(MULTI)                     |  | Nichirei            | 424154      | ~30m            | 37°C        | DAB             | ~3m                             | -          |                 |
| Uteroglobin                          | Histofine Simple Stain MAX-PO(MULTI)                     |  | Nichirei            | 414131F     | ~30m            | RT          | DAB             | ~1m                             | -          |                 |
|                                      | Histofine Simple Stain Rat MAX-PO(MULTI)                 |  | Nichirei            | 414191      | ~30m            | RT          | DAB             | ~5m                             | -          |                 |
| VC1.1 (HNK-1/N-CAM)                  | Envision+ / HRP, RUO Mouse                               |  | Agilent Technology  | K4001       | ~30m            | RT          | DAB             | ~3m                             | -          |                 |
| VE-Cadherin                          | Histofine Simple Stain Rat MAX-PO(R)                     |  | Nichirei            | 414181      | ~30m            | RT          | DAB             | ~3m                             | -          |                 |
| Vascular Endothelial Growth Factor A | Histofine Simple Stain MAX-PO(MULTI)                     |  | Nichirei            | 424154      | ~30m            | 37°C        | DAB             | ~3m                             | -          |                 |
|                                      | Histofine Simple Stain Rat MAX-PO(M)                     |  | Nichirei            | 414171      | ~60m            | RT          | DAB             | ~10m                            | -          |                 |
| Vimentin                             | Histofine Simple Stain Rat MAX-PO(MULTI)                 |  | Nichirei            | 414191      | ~30m            | RT          | DAB             | ~3m                             | -          |                 |
|                                      | EnVision+/HRP, Mouse                                     |  | Agilent Technology  | -           | ~30m            | RT          | DAB             | ~3m                             | 131        |                 |
|                                      | Histofine Simple Stain MAX-PO(MULTI)                     |  | Nichirei            | 424154      | ~30m            | 37°C        | DAB             | ~3m                             | -          |                 |
|                                      | Histofine Simple Stain MAX-PO(M)                         |  | Nichirei            | 424131      | ~30m            | RT          | DAB             | ~10m                            | -          |                 |
|                                      | Histofine Simple Stain Rat MAX-PO(MULTI) (Histo Stainer) |  | Nichirei            | 714191      | ~30m            | RT          | DAB             | ~10m                            | -          |                 |
|                                      | EnVision+ Dual Link, Single Reagents, HRP                |  | Agilent Technology  | K4063       | ~30m            | RT          | DAB             | ~3m                             | 132        |                 |
|                                      | Histofine Simple Stain Rat MAX-PO(MULTI)                 |  | Nichirei            | 414191F     | ~30m            | RT          | DAB             | ~1m                             | -          |                 |
|                                      | Histofine Simple Stain Rat MAX-PO(R)                     |  | Nichirei            | 414181      | ~30m            | RT          | DAB             | ~5m                             | 133        |                 |
| Vinculin                             | -                                                        |  | -                   | -           | -               | -           | No information  | For fluorescent antibody method | -          |                 |
| Von Willebrand Factor                | LSAB Kits, Universal, HRP, Rabbit/Mouse                  |  | Agilent Technology  | K0675       | ~10m            | RT          | DAB             | ~10s                            | -          |                 |
|                                      | EnVision+ Dual Link, Single Reagents, HRP                |  | Agilent Technology  | K4063       | ~30m            | RT          | DAB             | ~3m                             | -          |                 |
|                                      | Histofine Simple Stain Rat MAX-PO(R)                     |  | Nichirei            | 414181      | ~60m            | RT          | DAB             | ~10m                            | 134        |                 |
|                                      | VECTASTAIN Elite ABC Kit(rabbit IgG)                     |  | Vector Laboratories | PK-6101     | ~30m            | RT          | DAB             | ~1m                             | -          |                 |
|                                      | Histofine Simple Stain Mouse MAX-PO(R) (Histo Stainer)   |  | Nichirei            | 714341      | ~30m            | RT          | DAB             | ~5m                             | -          |                 |
|                                      | Histofine Simple Stain Rat MAX-PO(MULTI) (Histo Stainer) |  | Nichirei            | 714191      | ~30m            | RT          | DAB             | ~5m                             | -          |                 |
| Willms' Tumor 1                      | EnVision+/HRP, Rabbit                                    |  | Agilent Technology  | -           | ~30m            | RT          | DAB             | ~3m                             | 135        |                 |
|                                      | Histofine Simple Stain Rat MAX-PO(MULTI)                 |  | Nichirei            | 414191      | ~30m            | RT          | DAB             | ~3m                             | -          |                 |
|                                      | VECTASTAIN Elite ABC Kit(mouse IgG)                      |  | Vector Laboratories | PK-6102     | ~30m            | RT          | DAB             | ~3m                             | -          |                 |
|                                      | VECTOR ImmPRESS HRP REAGENT Anti-Rabbit IgG              |  | Vector Laboratories | MP-7451     | ~30m            | RT          | ImmPACT NovaRED | ~3m                             | -          |                 |
|                                      | Histofine Simple Stain Rat MAX-PO(MULTI)                 |  | Nichirei            | 414191F     | ~30m            | RT          | DAB             | ~1m                             | -          |                 |
| YM1/Chitinase 3-like 3               | Histofine Simple Stain Rat MAX-PO(M)                     |  | Nichirei            | 414171      | ~60m            | RT          | DAB             | ~10m                            | -          |                 |
|                                      | Histofine Simple Stain Rat MAX-PO(Rat)                   |  | Nichirei            | 414311      | ~30m            | RT          | DAB             | ~5m                             | 136        |                 |
| ZO-1                                 | Histofine Simple Stain Rat MAX-PO(R)                     |  | Nichirei            | 414181      | -               | -           | -               | No information                  | -          |                 |
| γH2AX                                | Rabbit IgG (H+L), Alexa488                               |  | -                   | A11008      | ~30m            | 37°C        | Other           | No information                  | -          |                 |

-: Not applicable or implementec

|                          |                                                                                                                                                                         |
|--------------------------|-------------------------------------------------------------------------------------------------------------------------------------------------------------------------|
| Clonality                | MoAb, Monoclonal ; PoAb, Polyclonal                                                                                                                                     |
| Animal species           | Rt, Rat; Mo, Mouse; Rb, Rabbit; GP, Guinea pig; Pri, Primate; Dog, Dog; Sw, Swine; Other, Other.                                                                        |
| Reactivity               | ○, good; △, conditional; ×, inappropriate                                                                                                                               |
| Fixing solution          | For, Buffered formalin; PFA, Paraformaldehyde; Zinc For, Zinc formalin; DA, Davidson; PLP, Periodate lysine paraformaldehyde; F, Sli, Frozen, Slice; Bo, Bouin Solution |
| Embedding                | F, Frozen; P, Paraffin                                                                                                                                                  |
| Antigen retrieval method | MW, Microwave; AU, Autoclave; PC, Pressure cooker; Boil, Boiling                                                                                                        |
| Solution                 | BF, Buffer                                                                                                                                                              |
| Time                     | s, second; m, minute; hr, hour; o/n, over night; d, day; w, week; m, month; y, year.                                                                                    |
| Blocking                 | H <sub>2</sub> O <sub>2</sub> , Hydrogen peroxide; BSA, Bovine serum albumin; PBS, Phosphate buffered salt                                                              |
| Temperature              | RT, Room temperature.                                                                                                                                                   |
| Coloring Reagent         | NF, New Fuchsin; DAB, Diaminobenzidine; FITC, Fluorescein isothiocyanate                                                                                                |
